# Supplementary material for: Relative Influence of Management and Site Factors on the Cost of Poor Quality: A Fuzzy AHP Study of Egyptian Construction Projects
Source: Research Square preprint supplement (doi:10.21203/rs.3.rs-8452378/v1), 2026-02-23
Supplement: Supplementary file 1 [file e2631821bcd5f72fa16eccee.xlsx]

## Sheet: نتيجة الاستبيان
	اسم الشركة	نوع الشركة	هل معتمدة ب ISO9000	تخصص الشركة	سنة التأسيس	المنصب	الدرجة العلمية الحاصل عليها	سنوات الخبرة في مجال العمل	عدد المشاريع المنفذة خلال الخمس سنوات الماضية	قيمة المشاريع المنفذة خلال الخمس سنوات الماضية (مليون جنيه مصرى)	قيمة المشروع الحالي	هل تطبق الشركة التي تعمل بها مفاهيم إدارة المشاريع ولديها نظام إدارة الجودة (QMS)	هل لديك أي علاقة بأنشطة إدارة الجودة ؟	1- طريقة تسليم المشروع أي الأجراء المحدد لإنهاء الخدمة التي يختارها العميل مثل ((Design-bid-build(DBB)/Design-build (DB)/Construction Manager at risk(CMAR)/Job order contracting /Fast track)	2- نوع العقد أي طريقة التعاقد بين الجهات المعنيه مثل (Unit price/ Lumpsum/ Cost plus fixed fee / Cost plus percentage fee/ Target cost / Other contract)	3- فئة المقاول أي درجة تصنيف المقاول طبقا لنظام تصنيف المقاولين مثل (درجة أولي - درجة ثانية - أخرى )	4- مدة المشروع أي التأخير عن الجدول الزمني المخطط لتسليم المشروع	5- موقع المشروع أي تأثير الاختيار الامثل لمكان المشروع	1- عدم متابعة العمل من قبل المشاركين في المشروع ( أي عدم قيام أطرف المشروع بمتابعه الاعمال بشكل دوري وعمل تقارير حول ما تم إنجازه )	2- عدم كفايه مواد البناء والمعدات وقطع الغيار ( أي النقص في الموارد المطلوبة وأعمال الصيانة )	3- عدم خبرة مديرين المشاريع، وفريق الإشراف في تحديد الاحتياجات ومتطلبات العمل ( أي عدم القدرة علي تحقيق التوازن بين مختلف المصالح والاحتياجات لأفراد فريق المشروع وأصحاب المصلحة )	4- عدم معرفةمدير مشروع بالتقنيات المناسبة ( أي هل تؤثر عدم معرفةمدير مشروع بالمهارات الفنية والتقنية علي تكلفة الجودة الرديئة ام معرفته بالمهارات الإدارية فقط )	5- المشاكل المتعلقة بالبيئه المحيطه للمشروع ( أي المشاكل المتعلقة بنظام البيئة مثل الهواء والماء والتربة وما إلي ذلك التي نشأت نتيجة للتدخل البشري أو سوء معاملة الأرض )	6- الخلافات والنزاعات بين المشاركين في المشروع ( أي الخلاف بين طرفي العقد بخصوص عقد المشروع او أحدي وثائقه )	7- ضعف تقنيات التخطيط والرقابة ( أي عدم تحقيق الأهداف المرسومة في ظل تحقيق الكفاءة في استخدام الموارد المتاحة )	8- عدم التنسيق بين المصممين والمقاولين ( أي عدم التنسيق بين الأطراف المشاركة لضمان التنفيذ الناجح لجميع المراحل وفقاً للأهداف المخططة )	9- عدم سرعة اتخاذ القرار بمشاركة جميع أطراف المشروع ( أي عدم القدرة علي رؤية الاختيارات المتاحة بوضوح )	10- نقص في تدريب الموارد البشرية على المهارات التي يتطلبها المشروع ( أي قله تدريب و تعزيز مهارات الموظفين لتطوير مهاراتهم وإمكانيتهم )	11- عدم التزام الإدارة بالتحسين المستمر للجودة ( أي قلة العمل علي تطوير العمليات والأنشطة المتعلقة بالالأت و المواد والأفراد وطرق الأنتاج بشكل مستمر )	12- عدم حساب تكلفة الجودة المخططة للمشروع ( أي عدم حساب التكاليف التي تتكبدها الشركة للتأكد من أن منتجاتها أو خدمتها تلبي معايير الجودة المطلوبة )	13- عدم خبرة فريق الإشراف ( أي عدم كفاءة التوجيه والإشراف علي الأعمال )	14- ترددمدير مشروع في اتخاذ القرار المالي ( أي عدم قدرةمدير مشروع في اي تغيير او تعديل علي سبيل المثال تغيير الميزانية المقدرة للمشروع )	15- التردد في اتخاذ القرار في الوقت المناسب من قبلمدير مشروع ( أي المماطلة المزمنة عند إتخاذ القرارات )	16- ضعف الإشراف ومتابعة العمل خلال ساعات العمل الإضافية ( أي ضعف تتبع ساعات نظام العمل الإضافي )	17- عدم مطابقة أهداف الجودة للمعايير والمواصفات ( أي عدم المطابقة لمتطلبات و مواصفات او خصائص معينة قادرة علي الوفاء بالمعايير والمتطلبات المتعارف عليها في المؤسسات المماثلة )	18- ضعف القيادة الفعالة لإدارة المشروع ( أي عدم القدرة علي توجيه وتحفيز الأفراد لتحقيق أهداف محددة )	19- عدم استخدام القوى العاملة الماهرة في التنفيذ ( أي تعيين عمالة بخبرات ضعيفة في أعمال التنفيذ )	20- عدم تخطيط التدفق النقدي ( أي عدم تطبيق نظام لمتابعة حركة الأموال داخل الشركة كل شهر اوخلال فترة معينة )	21- عدم وضوح الهيكل التنظيمي للعاملين بالمشروع ( أي عدم توضيح التنظيم والهيكل الإدراي للمؤسسة وتوزيع المهامات بفاعلية )	22- عدم استخدام أنظمة المشتريات المتكاملة ( أي ضعف ادارة عملية الشراء وعدم تحديد اهم احتياجات المنظمة )	23- ضعف التركيز علي عملية النفقات والمشتريات ( أي عدم متابعة الميزانية والتدفق النقدي )	24- ضعف الإنتاجية ( أي عدم إيجاد نظم وحلول جديدة لاستغلال الموارد المتاحة لتحقيق اعلي جودة في أفضل وقت وبأقل تكاليف ممكنة )	25- ضعف جودة الموارد المستخدمة ( أي عدم مطابقة الموارد للمواصفات و المعايير الفنية )	26- الفجوة بين الجدول الزمني المخطط والفعلي ( أي وجود فرق بين الوقت المخطط والوقت الفعلي المستغرق لإتمام المشروع )	27- الفجوة بين التكلفة المخططة والتكلفة الفعلية ( أي وجود فرق بين التكلفة المخططة والتكلفة الفعلية لإتمام المشروع )	28- الفجوة بين الهدف المخطط والفعلي ( أي وجود اختلاف بين الأداء الفعلي و الأداء المتوقع مستقبليأ للمؤسسة )	1- إهدار الموارد في الموقع ( أي إستخدام الموارد سواء مواد او ومعدات او عمالة بشكل غير جيد )	2- نقص الخبرة والموارد الفنية والمهنية لأداء المهمة ( أي ضعف المهارات لتقييم متطلبات المشروع وتحقيق النتايج المطلوبة )	3- عدم الوعي بالجودة لفريق المشروع ( أي عدم فهم قيمة الجودة والدقة في العمل لتقديم الخدمة بأفضل طريقة )
1	شركة العبد للمقاولات	خاصة	نعم	مقاول	1917	مدير المشروع	ماجيستير	من 10 إلي 15سنة	من 10 إلي أقل من 20	أكثر من 500	750 مليون جنية مصري	نعم	نعم	4	4	5	5	3	4	4	5	3	3	4	3	3	3	4	3	5	4	3	3	2	4	4	3	4	2	3	3	4	4	3	3	3	4	4	3
2	مكه للتطوير العقاري	خاصة	لا	مقاول	1999	مدير المشروع	بكالوريوس	من 5 إلي 10 سنوات	من 10 إلي أقل من 20	من 50 إلي أقل من 100	80 مليون	لا	نعم	5	5	2	2	2	2	2	2	2	2	3	1	1	1	1	1	1	1	1	1	1	1	1	1	1	1	1	1	1	1	1	1	1	3	1	1
3	Samco national Egypt	خاصة	نعم	مقاول	2000	مهندس مكتب	بكالوريوس	من 3 إلي أقل من 5 سنوات	من 5 إلي أقل من 10	أكثر من 500	789000000	نعم	نعم	4	4	4	2	4	1	2	1	2	3	2	3	3	2	2	2	2	2	3	2	2	2	2	2	2	2	2	2	2	2	2	2	2	1	1	1
4	شركه قصور الحمد للمقاولات	خاصة	نعم	مقاول	2004	مهندس مكتب	بكالوريوس	من 3 إلي أقل من 5 سنوات	من 5 إلي أقل من 10	من 50 إلي أقل من 100	٨٠ مليون	نعم	نعم	4	4	3	4	3	1	1	1	1	1	1	1	1	1	1	1	1	1	1	1	1	1	1	1	1	1	1	1	1	1	1	1	1	1	1	1
5	Nature for engineering consultancy	خاصة	نعم	استشاري	2018	مهندس مكتب	بكالوريوس	من 5 إلي 10 سنوات	من 5 إلي أقل من 10	أكثر من 500	2.5 مليار	نعم	نعم	2	3	5	5	3	5	4	5	5	3	2	4	5	2	4	3	3	5	3	5	4	2	3	2	3	5	5	3	2	4	3	2	4	4	4	4
6	Shaker consultancy group	خاصة	نعم	استشاري	1970	مدير المشروع	دكتوراه	أكثر من 20 سنة	من 10 إلي أقل من 20	من 300 إلي أقل من 500	مليون10	نعم	لا	4	4	5	4	5	3	5	2	5	4	4	3	2	2	4	3	3	4	2	4	4	4	3	3	3	1	3	5	2	1	3	4	2	5	2	2
7	شركه انجاز	خاصة	لا	مقاول	2018	مدير المشروع	بكالوريوس	من 5 إلي 10 سنوات	من 5 إلي أقل من 10	من 50 إلي أقل من 100	مليون 60	لا	نعم	2	3	5	5	3	5	4	5	5	3	2	4	5	2	4	3	3	5	3	5	4	2	3	2	3	5	1	1	4	5	2	4	2	4	5	4
8	الشركة المصرية لنقل الكهرباء	عامة	نعم	مقاول	2000	مدير المشروع	ماجيستير	من 10 إلي 15سنة	من 5 إلي أقل من 10	أكثر من 500	١٠٠ مليون دولار	نعم	نعم	4	3	5	5	1	3	2	2	2	2	4	4	5	5	3	3	4	2	4	3	4	2	4	2	4	4	2	4	4	2	4	4	4	3	2	2
9	المقاولون العرب	عامة	نعم	مقاول	1940	مدير المشروع	ماجيستير	أكثر من 20 سنة	أكثر من 20	أكثر من 500	650مليون	نعم	نعم	4	4	5	5	4	3	3	4	4	3	5	4	5	5	4	4	4	4	4	4	5	3	5	5	4	5	3	2	3	5	4	3	3	4	4	5
10	لافينسترا	خاصة	نعم	مقاول	2001	مدير المشروع	بكالوريوس	من 5 إلي 10 سنوات	أكثر من 20	من 300 إلي أقل من 500	80	نعم	نعم	2	4	3	5	5	5	3	2	3	3	5	4	5	3	4	3	4	3	3	5	3	3	3	2	1	1	1	1	1	1	2	1	2	1	2	1
11	بتروجيت	عامة	نعم	مقاول	1975	مدير المشروع	بكالوريوس	من 5 إلي 10 سنوات	من 5 إلي أقل من 10	من 300 إلي أقل من 500	70 مليون	نعم	نعم	5	5	5	1	5	1	1	1	1	3	2	1	2	1	2	1	2	2	3	1	1	1	2	1	2	2	1	2	1	2	2	2	2	3	2	1
12	Concrete Plus	خاصة	لا	مقاول	1995	مهندس مكتب	بكالوريوس	من 5 إلي 10 سنوات	من 5 إلي أقل من 10	من 300 إلي أقل من 500	190000000	نعم	لا	4	4	4	3	3	4	3	3	4	4	4	4	5	5	4	5	4	4	4	4	4	4	4	4	4	4	4	4	4	4	4	4	4	4	4	4
13	سكوب	خاصة	نعم	مقاول	2020	مهندس مكتب	بكالوريوس	من 3 إلي أقل من 5 سنوات	من 5 إلي أقل من 10	من 100 إلي أقل من 300	150 مليون	نعم	نعم	3	1	1	3	2	4	5	4	4	5	4	4	5	4	3	4	5	4	4	4	5	3	5	5	4	5	5	5	4	5	3	4	5	4	4	5
14	العبد للمقاولات	عامة	نعم	مقاول	1951	مهندس مكتب	بكالوريوس	من 5 إلي 10 سنوات	أكثر من 20	أكثر من 500	500	نعم	لا	3	1	1	5	5	1	1	1	5	5	5	5	3	5	5	5	5	4	5	3	1	5	3	2	5	5	3	5	3	3	5	5	5	5	2	3
15	المتحده للخدمات الهندسيه	خاصة	نعم	مقاول	من زمان	مدير المشروع	بكالوريوس	من 5 إلي 10 سنوات	أكثر من 20	أكثر من 500	٤ مليون دينار كويتي	نعم	نعم	4	5	3	4	5	1	1	1	1	1	1	1	1	1	1	1	1	1	1	1	1	1	1	1	1	1	1	1	1	1	1	1	1	1	1	1
16	E construct	خاصة	نعم	استشاري	2000	مهندس مكتب	دكتوراه	أكثر من 20 سنة	من 5 إلي أقل من 10	من 300 إلي أقل من 500	50	نعم	نعم	4	3	3	3	4	4	3	3	4	4	2	3	3	3	3	4	4	3	4	4	3	4	2	4	3	3	4	3	3	4	3	3	4	3	4	3
17	Rowad modern engineering	خاصة	نعم	مقاول	1998	مهندس مكتب	بكالوريوس	من 5 إلي 10 سنوات	من 10 إلي أقل من 20	أكثر من 500	Cost plus projects ( more than 5 billion )	نعم	لا	5	3	1	1	1	1	1	2	2	3	1	2	2	2	3	3	2	2	1	2	2	1	2	1	1	2	1	1	1	1	1	1	2	2	2	2
18	ACO construction	خاصة	نعم	مقاول	2017	مدير المشروع	بكالوريوس	من 5 إلي 10 سنوات	من 5 إلي أقل من 10	من 50 إلي أقل من 100	75 million	نعم	نعم	3	3	3	3	2	4	4	4	4	3	3	4	3	3	4	4	4	4	4	4	3	4	3	3	3	2	2	2	4	4	3	3	3	5	5	3
19	المليحى لمقاولات البناء	خاصة	نعم	مقاول	2018	مدير المشروع	بكالوريوس	من 5 إلي 10 سنوات	من 5 إلي أقل من 10	من 100 إلي أقل من 300	230 مليون	نعم	نعم	3	5	3	2	4	1	2	2	2	2	2	2	3	2	2	3	2	3	2	2	2	2	2	2	2	2	2	2	2	2	2	3	2	2	3	2
20	Elnegily Office	خاصة	لا	مقاول	2019	مهندس مكتب	ماجيستير	من 3 إلي أقل من 5 سنوات	من 5 إلي أقل من 10	أقل من 50	16million	نعم	لا	5	1	4	3	4	4	4	5	3	3	4	3	4	4	3	2	3	5	4	3	2	4	5	4	2	3	5	3	5	3	5	4	5	3	5	5
21	كونكريت للتطوير العقاري	خاصة	لا	مقاول	2014	مدير المشروع	بكالوريوس	من 5 إلي 10 سنوات	أكثر من 20	من 300 إلي أقل من 500	100	نعم	نعم	4	4	3	2	5	5	4	1	1	2	2	3	2	2	2	2	2	2	2	2	2	2	2	2	2	2	2	2	2	2	1	1	1	1	1	1
22	المقاولون العرب	خاصة	نعم	مقاول	1940	مدير المشروع	بكالوريوس	من 5 إلي 10 سنوات	من 5 إلي أقل من 10	أكثر من 500	1.7 مليون دولار	نعم	نعم	1	1	1	1	1	1	1	1	3	1	1	1	1	1	1	1	1	1	1	2	2	1	1	1	1	1	1	5	5	2	2	2	2	2	2	2
23	الرواد للانشاءت الهنسية	خاصة	نعم	مقاول	............	مدير المشروع	دكتوراه	من 10 إلي 15سنة	من 5 إلي أقل من 10	أكثر من 500	3 مليار	نعم	نعم	2	2	2	2	2	2	2	2	1	1	1	1	1	1	1	2	2	2	2	2	2	2	2	2	2	2	3	4	4	4	2	4	1	2	1	2
24	البدير للانشاءات	خاصة	لا	مقاول	2008	مدير المشروع	دكتوراه	أكثر من 20 سنة	من 10 إلي أقل من 20	أكثر من 500	40مليون دولار	نعم	نعم	1	1	1	1	1	1	1	1	1	1	1	1	1	1	1	1	1	1	1	1	1	1	1	1	1	1	1	4	4	3	4	3	1	1	1	1
25	مكتب effect للاستشارات الهندسية	خاصة	لا	استشاري	2012	مدير المشروع	بكالوريوس	أكثر من 20 سنة	من 10 إلي أقل من 20	أكثر من 500	1.5مليار جنية مصرى	لا	نعم	5	5	3	2	4	3	2	4	4	4	4	3	3	4	4	2	2	2	4	4	4	3	3	4	4	4	3	2	3	5	5	3	5	4	5	5
26	نيتش الاستشارية	خاصة	نعم	استشاري	.......	مدير المشروع	بكالوريوس	من 15 إلي 20 سنة	من 10 إلي أقل من 20	أكثر من 500	8مليار جنية مصرى	نعم	نعم	1	3	5	2	1	3	4	2	5	2	2	2	2	2	2	2	1	1	1	2	2	1	1	1	1	1	1	4	4	5	4	5	3	5	2	5
27	سمارت	خاصة	لا	مقاول	2006	مدير المشروع	بكالوريوس	أكثر من 20 سنة	من 10 إلي أقل من 20	أكثر من 500	35مليون دولار	نعم	لا	5	1	1	4	5	2	4	2	4	5	4	2	3	2	3	2	2	2	3	4	3	3	2	2	4	4	2	2	3	5	5	3	5	4	5	5
28	ابناء المهندس محمود حنفي سهمود	خاصة	لا	مقاول	1989	المدير/نائب المدير	بكالوريوس	من 5 إلي 10 سنوات	من 5 إلي أقل من 10	أكثر من 500	150مليون جنيه	لا	نعم	4	2	4	4	2	4	4	4	3	2	2	2	4	4	2	4	4	4	3	4	3	2	2	2	2	2	2	4	3	5	5	1	3	2	2	2
29	نيتشر للاستشارات الهندسية	خاصة	نعم	استشاري	.......	مدير المشروع	بكالوريوس	أكثر من 20 سنة	من 5 إلي أقل من 10	أكثر من 500	400مليون	نعم	نعم	5	3	2	3	5	4	3	3	4	4	5	4	5	5	5	4	4	4	4	3	4	3	3	5	5	4	3	4	4	5	5	4	3	3	4	4
30	امجاد الاستشاريةACG	خاصة	لا	استشاري	1996	مدير المشروع	بكالوريوس	من 10 إلي 15سنة	من 5 إلي أقل من 10	أكثر من 500	750مليون	نعم	لا	1	1	1	1	1	2	1	2	1	2	1	2	1	1	1	1	2	2	2	1	1	2	2	1	1	1	2	2	4	3	5	5	5	3	2	3
31	الخالدية للاستشارات الهندسية	خاصة	لا	استشاري	1997	مدير المشروع	بكالوريوس	من 10 إلي 15سنة	من 5 إلي أقل من 10	أكثر من 500	20مليون جنية	نعم	نعم	2	1	2	1	2	2	2	2	3	2	1	2	2	1	1	2	2	3	3	1	2	1	2	1	1	1	1	5	5	5	1	5	1	1	1	1
32	Concrete Plus	خاصة	لا	مقاول	1980	مدير المشروع	دكتوراه	أكثر من 20 سنة	من 5 إلي أقل من 10	أكثر من 500	350مليون جنيه	نعم	نعم	4	4	4	4	4	4	4	4	4	4	4	4	4	4	4	4	4	4	4	4	4	4	4	4	4	4	4	4	4	4	3	3	4	3	3	4
33	عز جروب للمقاولات العامة	خاصة	لا	مقاول	2006	مدير المشروع	بكالوريوس	من 10 إلي 15سنة	من 10 إلي أقل من 20	أكثر من 500	44 مليون جنية	نعم	لا	5	5	5	4	5	3	4	5	4	4	5	3	5	5	4	4	3	5	4	4	3	5	4	4	5	4	3	3	1	1	3	2	4	5	4	4
34	شركة المقاولون العرب عثماناحمد عثمان وشركاه	عامة	نعم	مقاول	1955	مدير المشروع	دكتوراه	من 15 إلي 20 سنة	أكثر من 20	أكثر من 500	4.5 مليار دولار	نعم	لا	5	3	5	3	3	5	5	5	5	2	3	1	3	3	5	5	5	5	5	5	5	5	1	1	5	3	5	3	1	1	5	5	1	1	1	5
35	سنتراد للتطوير العقارى	خاصة	لا	مقاول	2013	مدير المشروع	دكتوراه	من 10 إلي 15سنة	أكثر من 20	أكثر من 500	مليار	نعم	لا	1	1	1	1	1	1	1	1	1	1	1	1	1	1	1	1	1	1	1	1	1	1	1	1	1	1	1	4	5	3	4	5	1	1	1	1
36	الغنيمي للمقاولات العامة والتنمية العقارية	خاصة	لا	مقاول	2002	مدير المشروع	بكالوريوس	أكثر من 20 سنة	أكثر من 20	أكثر من 500	970مليون	نعم	نعم	3	4	3	3	4	3	3	4	3	4	3	4	4	3	3	4	3	4	2	4	3	4	4	3	4	4	3	4	3	3	3	4	4	3	3	4
37	شركة المليجي	خاصة	لا	مقاول	2021	مدير المشروع	بكالوريوس	من 5 إلي 10 سنوات	من 10 إلي أقل من 20	من 100 إلي أقل من 300	90مليون	لا	لا	4	4	5	5	3	4	4	5	3	3	4	3	3	3	4	3	5	4	3	3	2	4	4	3	4	2	1	1	1	1	1	1	1	3	1	1
38	شركة العبد للمقاولات	خاصة	نعم	مقاول	1917	مهندس مكتب	بكالوريوس	من 3 إلي أقل من 5 سنوات	من 10 إلي أقل من 20	أكثر من 500	750 مليون جنية مصري	نعم	نعم	4	4	4	2	4	1	2	1	2	3	2	3	3	2	2	2	2	2	3	2	2	2	2	2	2	2	1	1	1	1	1	1	1	1	1	1
39	Samco national Egypt	خاصة	نعم	مقاول	2000	مدير المشروع	دكتوراه	أكثر من 20 سنة	من 5 إلي أقل من 10	أكثر من 500	2 مليار	نعم	نعم	2	3	5	5	3	5	4	5	5	3	2	4	5	2	4	3	3	5	3	5	4	2	3	2	3	5	3	5	2	1	3	4	2	5	2	2
40	Nature for engineering consultancy	خاصة	نعم	استشاري	2018	مدير المشروع	دكتوراه	أكثر من 20 سنة	من 5 إلي أقل من 10	أكثر من 500	7 مليار	نعم	نعم	2	3	5	5	3	5	4	5	5	3	2	4	5	2	4	3	3	5	3	5	4	2	3	2	3	5	2	4	4	2	4	4	4	3	2	2
41	howeedy consultant	خاصة	نعم	استشاري	1971	مدير المشروع	دكتوراه	من 10 إلي 15سنة	أكثر من 20	أكثر من 500	40 مليون	نعم	نعم	4	4	5	5	4	3	3	4	4	3	5	4	5	5	4	4	4	4	4	4	5	3	5	5	4	5	1	1	1	1	2	1	2	1	2	1
42	المقاولون العرب	عامة	نعم	مقاول	1940	مهندس مكتب	ماجيستير	أكثر من 20 سنة	أكثر من 20	أكثر من 500	650مليون	نعم	نعم	5	5	5	1	5	1	1	1	1	3	2	1	2	1	2	1	2	2	3	1	1	1	2	1	2	2	4	4	4	4	4	4	4	4	4	4
43	بتروجيت	عامة	نعم	مقاول	1975	مهندس مكتب	بكالوريوس	من 5 إلي 10 سنوات	من 5 إلي أقل من 10	من 300 إلي أقل من 500	70 مليون	نعم	نعم	3	1	1	3	2	4	5	4	4	5	4	4	5	4	3	4	5	4	4	4	5	3	5	5	4	5	3	5	3	3	5	5	5	5	2	3
44	سكوب	خاصة	نعم	مقاول	2020	مدير المشروع	بكالوريوس	من 10 إلي 15سنة	من 5 إلي أقل من 10	من 100 إلي أقل من 300	150 مليون	نعم	نعم	4	5	3	4	5	1	1	1	1	1	1	1	1	1	1	1	1	1	1	1	1	1	1	1	1	1	4	3	3	4	3	3	4	3	4	3
45	العبد للمقاولات	عامة	نعم	مقاول	1951	مدير المشروع	بكالوريوس	من 10 إلي 15سنة	أكثر من 20	أكثر من 500	500	نعم	لا	5	3	1	1	1	1	1	2	2	3	1	2	2	2	3	3	2	2	1	2	2	1	2	1	1	2	2	2	4	4	3	3	3	5	5	3
46	E construct	خاصة	نعم	استشاري	2000	المدير/نائب المدير	ماجيستير	من 15 إلي 20 سنة	من 5 إلي أقل من 10	من 300 إلي أقل من 500	80	نعم	نعم	3	5	3	2	4	1	2	2	2	2	2	2	3	2	2	3	2	3	2	2	2	2	2	2	2	2	5	3	5	3	5	4	5	3	5	5
47	ACO construction	خاصة	نعم	مقاول	2017	مدير المشروع	ماجيستير	من 10 إلي 15سنة	من 5 إلي أقل من 10	من 50 إلي أقل من 100	50 million	نعم	نعم	2	1	1	1	1	1	1	2	2	2	2	1	1	1	1	1	1	2	2	1	1	1	1	4	2	1	1	5	3	1	1	1	1	1	2	2
48	المقاولون العرب	خاصة	نعم	مقاول	1940	مدير المشروع	ماجيستير	من 5 إلي 10 سنوات	من 5 إلي أقل من 10	أكثر من 500	مليون ونص دولار	نعم	نعم	2	2	2	4	4	3	3	3	5	5	3	3	3	3	3	3	4	3	3	4	4	3	3	4	4	4	4	3	3	3	3	2	4	4	4	4
49	الشمس للاستشارات الهندسية	خاصة	لا	استشاري	2008	مدير المشروع	دكتوراه	أكثر من 20 سنة	من 10 إلي أقل من 20	أكثر من 500	1مليار	نعم	نعم	2	2	2	2	2	2	3	2	2	3	2	2	2	4	2	2	2	2	2	2	2	2	3	2	2	3	2	3	5	3	2	4	1	2	2	2
50	شركة السويفي	خاصة	نعم	مقاول	2005	مدير المشروع	بكالوريوس	من 5 إلي 10 سنوات	من 5 إلي أقل من 10	من 300 إلي أقل من 500	4 مليون دولار	نعم	نعم	3	5	3	5	3	5	4	5	3	5	5	2	4	4	5	2	3	2	1	4	2	5	3	3	2	4	3	5	1	4	3	4	4	4	5	3
51	مصر للانشاءات المتطورة	خاصة	لا	مقاول	2018	مدير المشروع	بكالوريوس	من 15 إلي 20 سنة	من 10 إلي أقل من 20	من 100 إلي أقل من 300	550مليون دولار	نعم	نعم	4	5	4	5	3	3	3	3	4	3	4	3	2	3	4	3	4	3	4	5	3	2	3	3	3	3	4	5	3	4	3	4	3	4	5	3
52	ابناء المهندس محمود حنفي سهمود	خاصة	لا	مقاول	1989	مهندس موقع	بكالوريوس	من 5 إلي 10 سنوات	من 5 إلي أقل من 10	أكثر من 500	150مليون جنيه	لا	نعم	5	2	2	2	2	1	1	1	1	1	1	1	1	1	1	1	3	1	1	1	1	1	2	1	1	1	5	2	2	2	2	3	1	1	1	1
53	شركة الحوفي للمقاولات العامة	خاصة	لا	مقاول	2002	مدير المشروع	دكتوراه	من 15 إلي 20 سنة	من 10 إلي أقل من 20	من 100 إلي أقل من 300	80مليون	نعم	لا	4	2	1	1	3	3	2	2	2	2	2	2	2	2	2	2	1	1	1	1	2	2	2	2	2	3	4	4	4	2	2	2	3	2	2	3
54	سمارت	خاصة	لا	مقاول	2006	مهندس موقع	بكالوريوس	من 10 إلي 15سنة	من 10 إلي أقل من 20	أكثر من 500	35مليون دولار	نعم	لا	4	4	1	1	1	1	1	1	1	1	1	1	1	1	1	1	1	1	1	1	1	1	1	1	1	1	4	3	3	1	1	1	1	1	1	1
55	شركة المغربل للمقاولات	خاصة	نعم	مقاول	1970	مدير المشروع	بكالوريوس	أكثر من 20 سنة	من 5 إلي أقل من 10	أكثر من 500	مليار	نعم	نعم	3	5	5	5	3	4	2	3	5	5	2	2	5	3	4	2	4	4	3	4	2	4	4	3	4	3	2	5	3	4	5	2	5	4	3	3
56	شركة الاهرام للمقاولات العامة	خاصة	لا	مقاول	2020	مدير المشروع	بكالوريوس	من 15 إلي 20 سنة	من 5 إلي أقل من 10	من 100 إلي أقل من 300	تقريبا 65 مليون	نعم	لا	4	4	3	2	4	3	2	3	4	4	4	3	1	5	1	4	5	2	2	2	1	1	2	1	1	1	4	5	5	5	5	4	2	4	3	2
57	Concrete Plus	خاصة	لا	مقاول	1980	مدير المشروع	دكتوراه	من 15 إلي 20 سنة	من 5 إلي أقل من 10	أكثر من 500	150مليون جنيه	نعم	نعم	4	5	5	5	3	4	2	3	5	5	2	2	5	1	5	4	4	4	3	3	2	3	3	2	4	2	2	5	3	4	5	2	5	4	3	3
58	مكتب الرائد للاستشارات الهندسية	خاصة	لا	استشاري	2020	مدير المشروع	دكتوراه	أكثر من 20 سنة	من 10 إلي أقل من 20	من 100 إلي أقل من 300	200مليون جنية	نعم	نعم	3	5	3	2	2	4	5	3	2	3	2	2	4	4	2	4	3	2	4	2	4	3	3	2	2	2	4	5	1	2	2	4	5	3	4	4
59	شركة المقاولون العرب عثمان احمد عثمان وشركاه	عامة	نعم	مقاول	1955	مدير المشروع	بكالوريوس	أكثر من 20 سنة	أكثر من 20	أكثر من 500	80مليون	نعم	لا	4	5	3	4	3	4	5	4	4	4	3	5	5	2	5	3	4	5	5	5	4	4	4	3	5	3	4	5	4	3	4	5	5	4	4	4
60	الاخوة للمقاولات العامة	خاصة	لا	مقاول	2014	مدير المشروع	بكالوريوس	من 10 إلي 15سنة	من 10 إلي أقل من 20	أكثر من 500	30 مليون جنية	نعم	لا	4	5	5	2	3	4	3	3	3	5	3	2	1	1	1	1	1	1	1	1	2	2	1	2	1	2	2	3	5	3	3	5	5	4	4	3
61	الغنيمي للمقاولات العامة والتنمية العقارية	خاصة	لا	مقاول	2002	مهندس مكتب	بكالوريوس	من 5 إلي 10 سنوات	أكثر من 20	أكثر من 500	مليون ونص	نعم	نعم	5	1	1	1	3	1	1	1	2	1	1	1	2	2	2	2	3	1	2	1	2	3	2	2	1	1	5	5	5	1	1	2	2	2	2	3
62	سمارت سكيب للمقاولات	خاصة	لا	مقاول	2017	مدير المشروع	ماجيستير	أكثر من 20 سنة	أكثر من 20	أكثر من 500	90 مليون	نعم	لا	4	3	4	3	4	4	5	5	4	4	4	4	4	4	4	4	4	4	4	4	4	4	4	4	4	4	4	4	3	3	4	4	5	4	4	4
63	Shaker consultancy group	خاصة	نعم	استشاري	1970	مهندس موقع	بكالوريوس	من 5 إلي 10 سنوات	من 10 إلي أقل من 20	من 300 إلي أقل من 500	مليون7	نعم	لا	1	3	4	4	5	4	4	4	4	4	3	5	5	5	5	4	4	5	5	4	3	4	3	4	5	3	3	1	2	5	4	4	5	3	5	4
64	المقاولون العرب	عامة	نعم	مقاول	1940	مهندس مكتب	ماجيستير	أكثر من 20 سنة	أكثر من 20	أكثر من 500	650مليون	نعم	نعم	1	5	1	1	5	5	5	5	4	3	5	2	5	5	3	5	5	3	3	5	5	5	5	1	5	5	3	1	5	1	5	5	3	5	5	5
65	المتحده للخدمات الهندسيه	خاصة	نعم	مقاول	من زمان	مهندس موقع	بكالوريوس	من 5 إلي 10 سنوات	أكثر من 20	أكثر من 500	٤ مليون دينار كويتي	نعم	نعم	5	4	1	1	1	1	1	1	1	1	1	1	1	1	1	1	1	1	1	1	1	1	1	1	1	1	4	3	5	1	1	1	1	1	1	1
66	Rowad modern engineering	خاصة	نعم	مقاول	1998	مهندس موقع	بكالوريوس	من 5 إلي 10 سنوات	من 5 إلي أقل من 10	أكثر من 500	Cost plus projects ( more than 5 billion )	نعم	لا	3	3	4	3	4	3	3	4	3	4	4	4	3	3	4	3	3	3	4	3	3	2	3	4	4	3	4	3	4	3	4	2	3	3	4	4
67	ريدكون لانشاءات	خاصة	نعم	مقاول	2014	مدير المشروع	دكتوراه	من 10 إلي 15سنة	من 5 إلي أقل من 10	من 50 إلي أقل من 100	83 مليون	نعم	نعم	3	1	1	2	3	2	2	3	2	2	1	1	2	1	1	1	2	2	1	1	1	2	1	1	2	1	5	1	1	1	2	1	2	3	2	1
68	المقاولون العرب	خاصة	نعم	مقاول	1940	مدير المشروع	دكتوراه	أكثر من 20 سنة	من 10 إلي أقل من 20	أكثر من 500	750 مليون جنية مصري	نعم	نعم	3	3	4	4	3	4	3	4	4	4	4	3	2	2	4	3	5	3	3	3	4	3	4	3	4	4	3	3	2	4	4	3	3	4	4	4
69	مكتب النور للمقاولات	خاصة	لا	مقاول	2020	المدير/نائب المدير	بكالوريوس	من 5 إلي 10 سنوات	من 10 إلي أقل من 20	من 100 إلي أقل من 300	1.5مليون	لا	لا	5	2	1	2	2	2	2	3	3	2	2	2	2	2	2	3	2	2	2	2	2	2	2	3	2	2	3	3	4	2	2	2	3	2	2	2
70	الصفا للتسويق العقارى	خاصة	نعم	مقاول	2021	مدير المشروع	بكالوريوس	من 10 إلي 15سنة	من 5 إلي أقل من 10	من 100 إلي أقل من 300	35مليون	نعم	نعم	1	3	4	5	3	3	4	2	5	3	4	4	3	3	3	4	3	5	4	5	3	1	2	3	2	3	5	4	4	4	3	4	4	3	3	4
71	ابناء المهندس محمود حنفي سهمود	خاصة	لا	مقاول	1989	مدير المشروع	ماجيستير	أكثر من 20 سنة	أكثر من 20	أكثر من 500	190مليون جنيه	لا	نعم	4	5	3	4	3	4	3	4	5	3	2	4	4	3	4	3	3	4	1	3	5	3	2	2	3	3	4	5	4	5	3	3	3	3	4	3
72	سمكريت للاستشارات الهندسية	خاصة	نعم	استشاري	1974	مدير المشروع	دكتوراه	أكثر من 20 سنة	من 10 إلي أقل من 20	أكثر من 500	1.5 مليار	نعم	نعم	5	2	2	2	2	3	1	1	1	1	1	1	1	1	1	1	1	1	1	1	1	1	2	1	1	1	5	2	2	2	2	1	1	1	1	1
73	Elnegily Office	خاصة	لا	مقاول	1980	مدير المشروع	بكالوريوس	من 10 إلي 15سنة	من 5 إلي أقل من 10	أكثر من 500	150مليون جنيه	نعم	نعم	4	4	4	2	2	2	3	2	2	3	2	2	2	2	2	2	2	1	1	1	2	2	2	2	2	2	4	2	1	1	3	3	2	2	2	2
74	المصرية الهندسية للمقاولات	خاصة	نعم	مقاول	2009	مدير المشروع	بكالوريوس	أكثر من 20 سنة	من 10 إلي أقل من 20	من 300 إلي أقل من 500	45 مليون	نعم	نعم	4	3	3	1	1	1	1	1	1	1	1	1	1	1	1	1	1	1	1	1	1	1	1	1	1	1	4	4	1	1	1	1	1	1	1	1
75	سمكريت للاستشارات الهندسية	خاصة	نعم	استشاري	1974	مهندس موقع	بكالوريوس	من 15 إلي 20 سنة	من 5 إلي أقل من 10	أكثر من 500	10 مليار	نعم	نعم	2	5	3	4	5	2	5	4	3	3	4	3	3	5	2	3	4	4	3	4	2	2	4	3	4	4	3	5	5	5	3	4	2	3	5	5
76	سيكتورز للانشاءات	خاصة	لا	مقاول	2010	مدير المشروع	دكتوراه	أكثر من 20 سنة	أكثر من 20	من 300 إلي أقل من 500	700مليون جنية	نعم	نعم	4	5	5	5	5	4	2	4	3	2	4	3	3	3	2	3	2	2	2	2	2	1	2	1	1	1	4	4	3	2	4	3	2	3	4	4
77	Rowad modern engineering	خاصة	لا	مقاول	1980	مدير المشروع	بكالوريوس	من 15 إلي 20 سنة	أكثر من 20	أكثر من 500	150مليون جنيه	نعم	نعم	2	5	3	4	5	2	5	4	3	3	4	3	3	1	4	2	2	5	2	2	2	2	4	3	2	4	3	5	5	5	3	4	2	3	5	5
78	المصرية للمقاولات العامة	خاصة	لا	مقاول	1987	مدير المشروع	دكتوراه	من 10 إلي 15سنة	أكثر من 20	أكثر من 500	20 مليون	لا	لا	4	5	1	2	2	4	5	3	4	4	4	4	4	2	4	4	4	2	2	4	4	4	4	2	2	2	3	5	3	2	2	4	5	3	2	3
79	شركة المقاولون العرب	عامة	نعم	مقاول	1955	مدير المشروع	ماجيستير	أكثر من 20 سنة	من 10 إلي أقل من 20	أكثر من 500	مليار	نعم	لا	4	5	4	3	4	5	5	4	4	4	5	5	4	3	3	4	3	4	4	5	4	4	3	3	5	4	4	5	3	4	3	4	5	4	4	4
80	ORASCOM CONSTRUCTION	عامة	نعم	مقاول	1976	مدير المشروع	بكالوريوس	أكثر من 20 سنة	أكثر من 20	من 300 إلي أقل من 500	67 مليون	نعم	نعم	2	3	5	3	3	5	5	4	4	3	3	3	1	1	1	2	2	2	2	1	1	2	1	2	1	1	4	5	5	2	3	4	3	3	3	5
81	الغنيمي للمقاولات العامة والتنمية العقارية	خاصة	لا	مقاول	2002	مهندس مكتب	ماجيستير	من 3 إلي أقل من 5 سنوات	أكثر من 20	أكثر من 500	مليون ونص	نعم	نعم	5	5	5	1	1	2	2	2	2	3	1	2	2	1	1	2	2	2	2	1	2	3	1	1	1	1	5	1	1	1	3	1	1	1	2	1
82	شركة شاكر الاستشارية	خاصة	لا	استشاري	2017	مدير المشروع	ماجيستير	من 15 إلي 20 سنة	من 10 إلي أقل من 20	من 300 إلي أقل من 500	73 مليون	لا	لا	4	4	3	3	4	4	5	4	4	4	4	4	4	4	4	4	4	4	4	4	4	4	4	4	4	4	4	3	4	3	4	4	5	5	4	4
83	شركة العبد للمقاولات	خاصة	نعم	مقاول	1917	مهندس موقع	بكالوريوس	من 5 إلي 10 سنوات	من 10 إلي أقل من 20	أكثر من 500	750 مليون جنية مصري	نعم	نعم	3	1	2	5	4	4	5	3	5	4	5	5	4	5	4	3	5	4	3	5	4	5	4	5	4	4	1	3	4	4	5	4	4	4	4	4
84	Samco national Egypt	خاصة	نعم	مقاول	2000	مهندس مكتب	بكالوريوس	من 3 إلي أقل من 5 سنوات	من 5 إلي أقل من 10	أكثر من 500	1.5 مليار	نعم	نعم	3	1	5	1	5	5	3	5	5	5	1	3	5	3	3	5	5	2	1	3	5	5	5	5	1	3	1	5	1	1	5	5	5	5	4	3
85	Nature for engineering consultancy	خاصة	نعم	استشاري	2018	مهندس موقع	بكالوريوس	من 5 إلي 10 سنوات	من 5 إلي أقل من 10	أكثر من 500	مليار	نعم	نعم	4	3	5	1	1	1	1	1	1	1	1	1	1	1	1	1	1	1	1	1	1	1	1	1	1	1	5	4	1	1	1	1	1	1	1	1
86	العفيفي للاستشارات الهندسية	خاصة	نعم	استشاري	1976	مدير المشروع	دكتوراه	أكثر من 20 سنة	أكثر من 20	من 300 إلي أقل من 500	81 مليون	نعم	نعم	4	3	4	3	4	2	3	3	4	4	3	2	3	4	3	3	4	4	4	3	4	4	4	4	3	4	3	3	4	3	4	3	3	4	3	4
87	المقاولون العرب	عامة	نعم	مقاول	1940	مهندس مكتب	بكالوريوس	من 3 إلي أقل من 5 سنوات	أكثر من 20	أكثر من 500	1.7 مليون دولار	نعم	نعم	5	1	1	1	2	1	2	3	2	1	2	2	1	1	1	1	2	2	1	1	1	2	1	1	4	1	3	1	1	2	3	2	2	3	2	2
88	بتروجيت	عامة	نعم	مقاول	1975	مدير المشروع	بكالوريوس	من 5 إلي 10 سنوات	من 5 إلي أقل من 10	من 100 إلي أقل من 300	مليار	نعم	نعم	3	3	2	4	4	3	3	4	4	4	3	3	3	2	4	3	3	5	3	3	3	3	4	3	4	4	3	3	4	4	3	4	3	4	4	4
89	سكوب	خاصة	نعم	مقاول	2020	مهندس موقع	دكتوراه	من 15 إلي 20 سنة	من 5 إلي أقل من 10	من 100 إلي أقل من 300	150 مليون	نعم	نعم	3	3	4	2	2	2	3	2	2	2	2	2	2	2	2	2	2	3	2	4	2	2	2	2	2	3	5	2	1	2	2	2	2	3	3	2
90	العبد للمقاولات	عامة	نعم	مقاول	1951	مهندس مكتب	بكالوريوس	من 5 إلي 10 سنوات	أكثر من 20	أكثر من 500	500	نعم	لا	5	4	4	4	3	4	4	3	3	4	2	5	2	5	5	5	5	5	2	4	2	2	4	5	3	4	1	3	4	5	3	3	4	2	5	3
91	E construct	خاصة	نعم	استشاري	2000	مهندس مكتب	بكالوريوس	من 5 إلي 10 سنوات	من 5 إلي أقل من 10	من 300 إلي أقل من 500	170	نعم	نعم	5	2	1	2	2	2	2	3	3	2	2	2	2	2	2	3	2	2	2	2	2	2	2	3	2	2	3	3	4	2	2	2	3	2	2	2
92	future consulte	خاصة	لا	استشاري	2014	مدير المشروع	ماجيستير	أكثر من 20 سنة	من 10 إلي أقل من 20	أكثر من 500	63 مليون	نعم	لا	4	4	5	5	3	4	4	5	3	3	4	3	3	3	4	3	5	4	3	3	2	4	4	3	4	2	3	3	4	4	3	3	3	4	4	3
93	شركة البنا للمقاولات	خاصة	لا	مقاول	2012	مدير المشروع	بكالوريوس	من 10 إلي 15سنة	من 10 إلي أقل من 20	من 100 إلي أقل من 300	43 ملبون	لا	لا	5	5	2	2	2	2	2	2	2	2	3	1	1	1	1	1	1	1	1	1	1	1	1	1	1	1	1	1	1	1	1	1	1	3	1	1
94	Samco national Egypt	خاصة	نعم	مقاول	2000	مهندس موقع	بكالوريوس	من 10 إلي 15سنة	من 5 إلي أقل من 10	أكثر من 500	789000000	نعم	نعم	4	4	4	2	4	1	2	1	2	3	2	3	3	2	2	2	2	2	3	2	2	2	2	2	2	2	2	2	2	2	2	2	2	1	1	1
95	Nature for engineering consultancy	خاصة	نعم	استشاري	2018	مهندس مكتب	بكالوريوس	من 5 إلي 10 سنوات	من 5 إلي أقل من 10	أكثر من 500	2.5 مليار	نعم	نعم	2	3	5	5	3	5	4	5	5	3	2	4	5	2	4	3	3	5	3	5	4	2	3	2	3	5	5	3	2	4	3	2	4	4	4	4
96	sadco engineering works	خاصة	لا	استشاري	2005	مدير المشروع	بكالوريوس	من 10 إلي 15سنة	من 10 إلي أقل من 20	من 100 إلي أقل من 300	46 مليون	لا	نعم	2	3	5	5	3	5	4	5	5	3	2	4	5	2	4	3	3	5	3	5	4	2	3	2	3	5	1	1	4	5	2	4	2	4	5	4
97	شركة اوراسكم	عامة	نعم	مقاول	1976	مدير المشروع	ماجيستير	من 10 إلي 15سنة	من 10 إلي أقل من 20	أكثر من 500	2مليون دولار	نعم	نعم	4	3	5	5	1	3	2	2	2	2	4	4	5	5	3	3	4	2	4	3	4	2	4	2	4	4	2	4	4	2	4	4	4	3	2	2
98	المقاولون العرب	عامة	نعم	مقاول	1940	مدير المشروع	ماجيستير	أكثر من 20 سنة	أكثر من 20	أكثر من 500	100 مليون	نعم	نعم	4	4	5	5	4	3	3	4	4	3	5	4	5	5	4	4	4	4	4	4	5	3	5	5	4	5	3	2	3	5	4	3	3	4	4	5
99	البراء للمقاولات العامة	خاصة	لا	مقاول	2003	مدير المشروع	بكالوريوس	من 10 إلي 15سنة	أكثر من 20	من 100 إلي أقل من 300	20 مليون	نعم	لا	2	4	3	5	5	5	3	2	3	3	5	4	5	3	4	3	4	3	3	5	3	3	3	2	1	1	1	1	1	1	2	1	2	1	2	1
100	معمار للاستشارات الهندسية	خاصة	نعم	استشاري	2000	مدير المشروع	ماجيستير	من 10 إلي 15سنة	من 10 إلي أقل من 20	من 300 إلي أقل من 500	1 مليار	نعم	نعم	4	3	4	3	4	2	3	3	4	4	3	2	3	4	3	3	4	4	4	3	4	4	4	4	3	4	3	3	4	3	4	3	3	4	3	4
101	بتروجيت	عامة	نعم	مقاول	1975	مدير المشروع	بكالوريوس	من 5 إلي 10 سنوات	من 5 إلي أقل من 10	من 100 إلي أقل من 300	900 مليون	نعم	نعم	3	3	2	4	4	3	3	4	4	4	3	3	3	2	4	3	3	5	3	3	3	3	4	3	4	4	3	3	4	4	3	4	3	4	4	4
102	الشركة الهندسية للمقاولات العامة	خاصة	لا	مقاول	2019	مدير المشروع	بكالوريوس	من 10 إلي 15سنة	من 10 إلي أقل من 20	من 300 إلي أقل من 500	54 مليون	لا	لا	4	5	4	3	4	5	5	4	4	4	5	5	4	3	3	4	3	4	4	5	4	4	3	3	5	4	4	5	3	4	3	4	5	4	4	4
103	كونسبت للاستشارات الهندسية	خاصة	نعم	استشاري	2017	مدير المشروع	بكالوريوس	من 10 إلي 15سنة	من 10 إلي أقل من 20	من 100 إلي أقل من 300	25مليون	نعم	لا	2	3	5	3	3	5	5	4	4	3	3	3	1	1	1	2	2	2	2	1	1	2	1	2	1	1	4	5	5	2	3	4	3	3	3	5
104	بيت الخبرة (د مصطفي قرشي)	خاصة	نعم	استشاري	2015	مدير المشروع	دكتوراه	من 10 إلي 15سنة	من 10 إلي أقل من 20	من 300 إلي أقل من 500	154 مليون	نعم	نعم	4	4	3	3	4	4	5	4	4	4	4	4	4	4	4	4	4	4	4	4	4	4	4	4	4	4	4	3	4	3	4	4	5	5	4	4
105	سمارت	خاصة	لا	مقاول	2006	مهندس مكتب	بكالوريوس	من 10 إلي 15سنة	من 10 إلي أقل من 20	أكثر من 500	35مليون دولار	نعم	لا	4	4	1	1	1	1	1	1	1	1	1	1	1	1	1	1	1	1	1	1	1	1	1	1	1	1	4	3	3	1	1	1	1	1	1	1
106	الاقصي للمقاولات	خاصة	لا	مقاول	1996	مدير المشروع	بكالوريوس	أكثر من 20 سنة	من 5 إلي أقل من 10	أكثر من 500	270.000.000	نعم	لا	3	5	5	5	3	4	2	3	5	5	2	2	5	3	4	2	4	4	3	4	2	4	4	3	4	3	2	5	3	4	5	2	5	4	3	3
107	احمد عبد الحفيظ للمقاولات العامة	خاصة	لا	مقاول	1980	مدير المشروع	بكالوريوس	من 15 إلي 20 سنة	من 10 إلي أقل من 20	أكثر من 500	150مليون جنيه	نعم	نعم	4	5	5	5	3	4	2	3	5	5	2	2	5	1	5	4	4	4	3	3	2	3	3	2	4	2	2	5	3	4	5	2	5	4	3	3
108	مصر للاستشارات	خاصة	لا	استشاري	2017	مدير المشروع	دكتوراه	أكثر من 20 سنة	أكثر من 20	من 300 إلي أقل من 500	2 مليار	نعم	نعم	3	5	3	2	2	4	5	3	2	3	2	2	4	4	2	4	3	2	4	2	4	3	3	2	2	2	4	5	1	2	2	4	5	3	4	4
109	EHAF consulting	خاصة	نعم	استشاري	2014	مدير المشروع	بكالوريوس	من 10 إلي 15سنة	أكثر من 20	من 300 إلي أقل من 500	79 مليون	نعم	نعم	4	5	3	4	3	4	5	4	4	4	3	5	5	2	5	3	4	5	5	5	4	4	4	3	5	3	4	5	4	3	4	5	5	4	4	4
110	بناء للتشييد والتطوير	خاصة	نعم	مقاول	2014	مدير المشروع	دكتوراه	من 10 إلي 15سنة	من 10 إلي أقل من 20	من 300 إلي أقل من 500	8مليار	نعم	نعم	4	2	1	1	3	3	2	2	2	2	2	2	2	2	2	2	1	1	1	1	2	2	2	2	2	3	4	4	4	2	2	2	3	2	2	3
111	ايروب جروب للاستشارات الهندسية	خاصة	لا	استشاري	2004	مدير المشروع	بكالوريوس	أكثر من 20 سنة	من 10 إلي أقل من 20	أكثر من 500	25مليون دولار	نعم	لا	4	4	1	1	1	1	1	1	1	1	1	1	1	1	1	1	1	1	1	1	1	1	1	1	1	1	4	3	3	1	1	1	1	1	1	1
112	سمكريت للاستشارات الهندسية	خاصة	نعم	استشاري	1974	مهندس مكتب	دكتوراه	أكثر من 20 سنة	من 5 إلي أقل من 10	أكثر من 500	6 مليار	نعم	نعم	3	5	5	5	3	4	2	3	5	5	2	2	5	3	4	2	4	4	3	4	2	4	4	3	4	3	2	5	3	4	5	2	5	4	3	3
113	الصرح الهندسي	خاصة	نعم	مقاول	2010	مدير المشروع	ماجيستير	أكثر من 20 سنة	من 10 إلي أقل من 20	أكثر من 500	تقريبا مليار	نعم	نعم	4	4	3	2	4	3	2	3	4	4	4	3	1	5	1	4	5	2	2	2	1	1	2	1	1	1	4	5	5	5	5	4	2	4	3	2
114	احمد عبد الحفيظ للمقاولات العامة	خاصة	لا	مقاول	1980	مهندس موقع	بكالوريوس	من 5 إلي 10 سنوات	من 5 إلي أقل من 10	أكثر من 500	150مليون جنيه	نعم	نعم	4	5	5	5	3	4	2	3	5	5	2	2	5	1	5	4	4	4	3	3	2	3	3	2	4	2	2	5	3	4	5	2	5	4	3	3
115	شركة الفهد للمقاولات	خاصة	لا	مقاول	2020	مدير المشروع	ماجيستير	أكثر من 20 سنة	من 5 إلي أقل من 10	من 50 إلي أقل من 100	20مليون جنية	نعم	نعم	3	5	3	2	2	4	5	3	2	3	2	2	4	4	2	4	3	2	4	2	4	3	3	2	2	2	4	5	1	2	2	4	5	3	4	4
116	النيل للاستشارات الهندسية	خاصة	نعم	استشاري	2012	مدير المشروع	بكالوريوس	من 15 إلي 20 سنة	من 10 إلي أقل من 20	أكثر من 500	86 مليون	نعم	نعم	4	5	3	4	3	4	5	4	4	4	3	5	5	2	5	3	4	5	5	5	4	4	4	3	5	3	4	5	4	3	4	5	5	4	4	4
117	شركة النصر للانشاءات	خاصة	نعم	مقاول	1998	مدير المشروع	دكتوراه	أكثر من 20 سنة	من 10 إلي أقل من 20	من 300 إلي أقل من 500	170 مليون	نعم	نعم	5	5	2	2	2	2	2	2	2	2	3	1	1	1	1	1	1	1	1	1	1	1	1	1	1	1	1	1	1	1	1	1	1	3	1	1
118	شركه قصور الحمد للمقاولات	خاصة	نعم	مقاول	2004	مدير المشروع	ماجيستير	من 15 إلي 20 سنة	من 5 إلي أقل من 10	من 50 إلي أقل من 100	٨٠ مليون	نعم	نعم	4	4	3	4	3	1	1	1	1	1	1	1	1	1	1	1	1	1	1	1	1	1	1	1	1	1	1	1	1	1	1	1	1	1	1	1
119	Shaker consultancy group	خاصة	نعم	استشاري	1970	مهندس مكتب	بكالوريوس	من 5 إلي 10 سنوات	من 10 إلي أقل من 20	من 300 إلي أقل من 500	مليون10	نعم	لا	4	4	5	4	5	3	5	2	5	4	4	3	2	2	4	3	3	4	2	4	4	4	3	3	3	1	3	5	2	1	3	4	2	5	2	2
120	الشركة المصرية لنقل الكهرباء	عامة	نعم	مقاول	2000	مهندس مكتب	ماجيستير	من 10 إلي 15سنة	أقل من 5	أكثر من 500	١٠٠ مليون دولار	نعم	نعم	4	3	5	5	1	3	2	2	2	2	4	4	5	5	3	3	4	2	4	3	4	2	4	2	4	4	2	4	4	2	4	4	4	3	2	2
121	ارامكو للمقاولات	خاصة	لا	مقاول	2017	مدير المشروع	ماجيستير	من 5 إلي 10 سنوات	من 10 إلي أقل من 20	من 100 إلي أقل من 300	100	نعم	لا	2	4	3	5	5	5	3	2	3	3	5	4	5	3	4	3	4	3	3	5	3	3	3	2	1	1	1	1	1	1	2	1	2	1	2	1
122	مجموعة النوبي للانشاءات	خاصة	لا	مقاول	2000	مدير المشروع	بكالوريوس	من 10 إلي 15سنة	من 10 إلي أقل من 20	من 100 إلي أقل من 300	120 مليون	لا	لا	5	5	2	2	2	2	2	2	2	2	3	1	1	1	1	1	1	1	1	1	1	1	1	1	1	1	1	1	1	1	1	1	1	3	1	1
123	دالبيدا للهندسة والمقاولات	خاصة	لا	مقاول	2020	مدير المشروع	بكالوريوس	من 10 إلي 15سنة	من 5 إلي أقل من 10	من 50 إلي أقل من 100	45 مليون	لا	نعم	2	3	5	5	3	5	4	5	5	3	2	4	5	2	4	3	3	5	3	5	4	2	3	2	3	5	1	1	4	5	2	4	2	4	5	4
124	المقاولون العرب	عامة	نعم	مقاول	1940	مدير المشروع	دكتوراه	من 5 إلي 10 سنوات	أكثر من 20	أكثر من 500	مليار	نعم	نعم	4	4	5	5	4	3	3	4	4	3	5	4	5	5	4	4	4	4	4	4	5	3	5	5	4	5	3	2	3	5	4	3	3	4	4	5
[truncated: 16 more columns]

## Sheet: N (OK)
	اسم الشركة	نوع الشركة	هل معتمدة ب ISO9000	تخصص الشركة	سنة التأسيس	المنصب	الدرجة العلمية الحاصل عليها	سنوات الخبرة في مجال العمل	عدد المشاريع المنفذة خلال الخمس سنوات الماضية	قيمة المشاريع المنفذة خلال الخمس سنوات الماضية (مليون جنيه مصرى)	قيمة المشروع الحالي	هل تطبق الشركة التي تعمل بها مفاهيم إدارة المشاريع ولديها نظام إدارة الجودة (QMS)	هل لديك أي علاقة بأنشطة إدارة الجودة ؟	1- طريقة تسليم المشروع أي الأجراء المحدد لإنهاء الخدمة التي يختارها العميل مثل ((Design-bid-build(DBB)/Design-build (DB)/Construction Manager at risk(CMAR)/Job order contracting /Fast track)	2- نوع العقد أي طريقة التعاقد بين الجهات المعنيه مثل (Unit price/ Lumpsum/ Cost plus fixed fee / Cost plus percentage fee/ Target cost / Other contract)	3- فئة المقاول أي درجة تصنيف المقاول طبقا لنظام تصنيف المقاولين مثل (درجة أولي - درجة ثانية - أخرى )	4- مدة المشروع أي التأخير عن الجدول الزمني المخطط لتسليم المشروع	5- موقع المشروع أي تأثير الاختيار الامثل لمكان المشروع	1- عدم متابعة العمل من قبل المشاركين في المشروع ( أي عدم قيام أطرف المشروع بمتابعه الاعمال بشكل دوري وعمل تقارير حول ما تم إنجازه )	2- عدم كفايه مواد البناء والمعدات وقطع الغيار ( أي النقص في الموارد المطلوبة وأعمال الصيانة )	3- عدم خبرة مديرين المشاريع، وفريق الإشراف في تحديد الاحتياجات ومتطلبات العمل ( أي عدم القدرة علي تحقيق التوازن بين مختلف المصالح والاحتياجات لأفراد فريق المشروع وأصحاب المصلحة )	4- عدم معرفةمدير مشروع بالتقنيات المناسبة ( أي هل تؤثر عدم معرفةمدير مشروع بالمهارات الفنية والتقنية علي تكلفة الجودة الرديئة ام معرفته بالمهارات الإدارية فقط )	5- المشاكل المتعلقة بالبيئه المحيطه للمشروع ( أي المشاكل المتعلقة بنظام البيئة مثل الهواء والماء والتربة وما إلي ذلك التي نشأت نتيجة للتدخل البشري أو سوء معاملة الأرض )	6- الخلافات والنزاعات بين المشاركين في المشروع ( أي الخلاف بين طرفي العقد بخصوص عقد المشروع او أحدي وثائقه )	7- ضعف تقنيات التخطيط والرقابة ( أي عدم تحقيق الأهداف المرسومة في ظل تحقيق الكفاءة في استخدام الموارد المتاحة )	8- عدم التنسيق بين المصممين والمقاولين ( أي عدم التنسيق بين الأطراف المشاركة لضمان التنفيذ الناجح لجميع المراحل وفقاً للأهداف المخططة )	9- عدم سرعة اتخاذ القرار بمشاركة جميع أطراف المشروع ( أي عدم القدرة علي رؤية الاختيارات المتاحة بوضوح )	10- نقص في تدريب الموارد البشرية على المهارات التي يتطلبها المشروع ( أي قله تدريب و تعزيز مهارات الموظفين لتطوير مهاراتهم وإمكانيتهم )	11- عدم التزام الإدارة بالتحسين المستمر للجودة ( أي قلة العمل علي تطوير العمليات والأنشطة المتعلقة بالالأت و المواد والأفراد وطرق الأنتاج بشكل مستمر )	12- عدم حساب تكلفة الجودة المخططة للمشروع ( أي عدم حساب التكاليف التي تتكبدها الشركة للتأكد من أن منتجاتها أو خدمتها تلبي معايير الجودة المطلوبة )	13- عدم خبرة فريق الإشراف ( أي عدم كفاءة التوجيه والإشراف علي الأعمال )	14- ترددمدير مشروع في اتخاذ القرار المالي ( أي عدم قدرةمدير مشروع في اي تغيير او تعديل علي سبيل المثال تغيير الميزانية المقدرة للمشروع )	15- التردد في اتخاذ القرار في الوقت المناسب من قبلمدير مشروع ( أي المماطلة المزمنة عند إتخاذ القرارات )	16- ضعف الإشراف ومتابعة العمل خلال ساعات العمل الإضافية ( أي ضعف تتبع ساعات نظام العمل الإضافي )	17- عدم مطابقة أهداف الجودة للمعايير والمواصفات ( أي عدم المطابقة لمتطلبات و مواصفات او خصائص معينة قادرة علي الوفاء بالمعايير والمتطلبات المتعارف عليها في المؤسسات المماثلة )	18- ضعف القيادة الفعالة لإدارة المشروع ( أي عدم القدرة علي توجيه وتحفيز الأفراد لتحقيق أهداف محددة )	19- عدم استخدام القوى العاملة الماهرة في التنفيذ ( أي تعيين عمالة بخبرات ضعيفة في أعمال التنفيذ )	20- عدم تخطيط التدفق النقدي ( أي عدم تطبيق نظام لمتابعة حركة الأموال داخل الشركة كل شهر اوخلال فترة معينة )	21- عدم وضوح الهيكل التنظيمي للعاملين بالمشروع ( أي عدم توضيح التنظيم والهيكل الإدراي للمؤسسة وتوزيع المهامات بفاعلية )	22- عدم استخدام أنظمة المشتريات المتكاملة ( أي ضعف ادارة عملية الشراء وعدم تحديد اهم احتياجات المنظمة )	23- ضعف التركيز علي عملية النفقات والمشتريات ( أي عدم متابعة الميزانية والتدفق النقدي )	24- ضعف الإنتاجية ( أي عدم إيجاد نظم وحلول جديدة لاستغلال الموارد المتاحة لتحقيق اعلي جودة في أفضل وقت وبأقل تكاليف ممكنة )	25- ضعف جودة الموارد المستخدمة ( أي عدم مطابقة الموارد للمواصفات و المعايير الفنية )	26- الفجوة بين الجدول الزمني المخطط والفعلي ( أي وجود فرق بين الوقت المخطط والوقت الفعلي المستغرق لإتمام المشروع )	27- الفجوة بين التكلفة المخططة والتكلفة الفعلية ( أي وجود فرق بين التكلفة المخططة والتكلفة الفعلية لإتمام المشروع )	28- الفجوة بين الهدف المخطط والفعلي ( أي وجود اختلاف بين الأداء الفعلي و الأداء المتوقع مستقبليأ للمؤسسة )	1- إهدار الموارد في الموقع ( أي إستخدام الموارد سواء مواد او ومعدات او عمالة بشكل غير جيد )	2- نقص الخبرة والموارد الفنية والمهنية لأداء المهمة ( أي ضعف المهارات لتقييم متطلبات المشروع وتحقيق النتايج المطلوبة )	3- عدم الوعي بالجودة لفريق المشروع ( أي عدم فهم قيمة الجودة والدقة في العمل لتقديم الخدمة بأفضل طريقة )
1	شركة العبد للمقاولات	خاصة	نعم	مقاول	1917	مدير المشروع	ماجيستير	من 10 إلي 15سنة	من 10 إلي أقل من 20	أكثر من 500	750 مليون جنية مصري	نعم	نعم	4	4	5	5	3	4	4	5	3	3	4	3	3	3	4	3	5	4	3	3	2	4	4	3	4	2	3	3	4	4	3	3	3	4	4	3
													1	X1	X2	X3	X4	X5	X6	X7	X8	X9	X10	X11	X12	X13	X14	X15	X16	X17	X18	X19	X20	X21	X22	X23	X24	X25	X26	X27	X28	X29	X30	X31	X32	X33	X34	X35	X36
														4	4	5	5	3	4	4	5	3	3	4	3	3	3	4	3	5	4	3	3	2	4	4	3	4	2	3	3	4	4	3	3	3	4	4	3
	X1			X2			X3			X4			X5			X6			X7			X8			X9			X10			X11			X12			X13			X14			X15			X16			X17
X1	1	1	1	1	1	1	1	2	3	1	2	3	1	0.5	0.333333	1	1	1	1	1	1	1	2	3	1	0.5	0.333333	1	0.5	0.333333	1	1	1	1	0.5	0.333333	1	0.5	0.333333	1	0.5	0.333333	1	1	1	1	0.5	0.333333	1
X2	1	1	1	1	1	1	1	2	3	1	2	3	1	0.5	0.333333	1	1	1	1	1	1	1	2	3	1	0.5	0.333333	1	0.5	0.333333	1	1	1	1	0.5	0.333333	1	0.5	0.333333	1	0.5	0.333333	1	1	1	1	0.5	0.333333	1
X3	0.333333	0.5	1	0.333333	0.5	1	1	1	1	1	1	1	0.5	0.333333	0.25	1	0.5	0.333333	1	0.5	0.333333	1	1	1	0.5	0.333333	0.25	0.5	0.333333	0.25	1	0.5	0.333333	0.5	0.333333	0.25	0.5	0.333333	0.25	0.5	0.333333	0.25	1	0.5	0.333333	0.5	0.333333	0.25	1
X4	0.333333	0.5	1	0.333333	0.5	1	1	1	1	1	1	1	0.5	0.333333	0.25	1	0.5	0.333333	1	0.5	0.333333	1	1	1	0.5	0.333333	0.25	0.5	0.333333	0.25	1	0.5	0.333333	0.5	0.333333	0.25	0.5	0.333333	0.25	0.5	0.333333	0.25	1	0.5	0.333333	0.5	0.333333	0.25	1
X5	1	2	3	1	2	3	2	3	4	2	3	4	1	1	1	1	2	3	1	2	3	2	3	4	1	1	1	1	1	1	1	2	3	1	1	1	1	1	1	1	1	1	1	2	3	1	1	1	2
X6	1	1	1	1	1	1	1	2	3	1	2	3	0.333333	0.5	1	1	1	1	1	1	1	1	2	3	1	0.5	0.333333	1	0.5	0.333333	1	1	1	1	0.5	0.333333	1	0.5	0.333333	1	0.5	0.333333	1	1	1	1	0.5	0.333333	1
X7	1	1	1	1	1	1	1	2	3	1	2	3	0.333333	0.5	1	1	1	1	1	1	1	1	2	3	1	0.5	0.333333	1	0.5	0.333333	1	1	1	1	0.5	0.333333	1	0.5	0.333333	1	0.5	0.333333	1	1	1	1	0.5	0.333333	1
X8	0.333333	0.5	1	0.333333	0.5	1	1	1	1	1	1	1	0.25	0.333333	0.5	0.333333	0.5	1	0.333333	0.5	1	1	1	1	0.5	0.333333	0.25	0.5	0.333333	0.25	1	0.5	0.333333	0.5	0.333333	0.25	0.5	0.333333	0.25	0.5	0.333333	0.25	1	0.5	0.333333	0.5	0.333333	0.25	1
X9	1	2	3	1	2	3	2	3	4	2	3	4	1	1	1	1	2	3	1	2	3	2	3	4	1	1	1	1	1	1	1	2	3	1	1	1	1	1	1	1	1	1	1	2	3	1	1	1	2
X10	1	2	3	1	2	3	2	3	4	2	3	4	1	1	1	1	2	3	1	2	3	2	3	4	1	1	1	1	1	1	1	2	3	1	1	1	1	1	1	1	1	1	1	2	3	1	1	1	2
X11	1	1	1	1	1	1	1	2	3	1	2	3	0.333333	0.5	1	1	1	1	1	1	1	1	2	3	0.333333	0.5	1	0.333333	0.5	1	1	1	1	1	0.5	0.333333	1	0.5	0.333333	1	0.5	0.333333	1	1	1	1	0.5	0.333333	1
X12	1	2	3	1	2	3	2	3	4	2	3	4	1	1	1	1	2	3	1	2	3	2	3	4	1	1	1	1	1	1	1	2	3	1	1	1	1	1	1	1	1	1	1	2	3	1	1	1	2
X13	1	2	3	1	2	3	2	3	4	2	3	4	1	1	1	1	2	3	1	2	3	2	3	4	1	1	1	1	1	1	1	2	3	1	1	1	1	1	1	1	1	1	1	2	3	1	1	1	2
X14	1	2	3	1	2	3	2	3	4	2	3	4	1	1	1	1	2	3	1	2	3	2	3	4	1	1	1	1	1	1	1	2	3	1	1	1	1	1	1	1	1	1	1	2	3	1	1	1	2
X15	1	1	1	1	1	1	1	2	3	1	2	3	0.333333	0.5	1	1	1	1	1	1	1	1	2	3	0.333333	0.5	1	0.333333	0.5	1	1	1	1	0.333333	0.5	1	0.333333	0.5	1	0.333333	0.5	1	1	1	1	1	0.5	0.333333	1
X16	1	2	3	1	2	3	2	3	4	2	3	4	1	1	1	1	2	3	1	2	3	2	3	4	1	1	1	1	1	1	1	2	3	1	1	1	1	1	1	1	1	1	1	2	3	1	1	1	2
X17	0.333333	0.5	1	0.333333	0.5	1	1	1	1	1	1	1	0.25	0.333333	0.5	0.333333	0.5	1	0.333333	0.5	1	1	1	1	0.25	0.333333	0.5	0.25	0.333333	0.5	0.333333	0.5	1	0.25	0.333333	0.5	0.25	0.333333	0.5	0.25	0.333333	0.5	0.333333	0.5	1	0.25	0.333333	0.5	1
X18	1	1	1	1	1	1	1	2	3	1	2	3	0.333333	0.5	1	1	1	1	1	1	1	1	2	3	0.333333	0.5	1	0.333333	0.5	1	1	1	1	0.333333	0.5	1	0.333333	0.5	1	0.333333	0.5	1	1	1	1	0.333333	0.5	1	1
X19	1	2	3	1	2	3	2	3	4	2	3	4	1	1	1	1	2	3	1	2	3	2	3	4	1	1	1	1	1	1	1	2	3	1	1	1	1	1	1	1	1	1	1	2	3	1	1	1	2
X20	1	2	3	1	2	3	2	3	4	2	3	4	1	1	1	1	2	3	1	2	3	2	3	4	1	1	1	1	1	1	1	2	3	1	1	1	1	1	1	1	1	1	1	2	3	1	1	1	2
X21	2	3	4	2	3	4	3	4	5	3	4	5	1	2	3	2	3	4	2	3	4	3	4	5	1	2	3	1	2	3	2	3	4	1	2	3	1	2	3	1	2	3	2	3	4	1	2	3	3
X22	1	1	1	1	1	1	1	2	3	1	2	3	1	2	3	1	1	1	1	1	1	1	2	3	0.333333	0.5	1	0.333333	0.5	1	1	1	1	0.333333	0.5	1	0.333333	0.5	1	0.333333	0.5	1	1	1	1	0.333333	0.5	1	1
X23	1	1	1	1	1	1	1	2	3	1	2	3	0.333333	0.5	1	1	1	1	1	1	1	1	2	3	0.333333	0.5	1	0.333333	0.5	1	1	1	1	0.333333	0.5	1	0.333333	0.5	1	0.333333	0.5	1	1	1	1	0.333333	0.5	1	1
X24	1	2	3	1	2	3	2	3	4	2	3	4	1	1	1	1	2	3	1	2	3	2	3	4	1	1	1	1	1	1	1	2	3	1	1	1	1	1	1	1	1	1	1	2	3	1	1	1	2
X25	1	1	1	1	1	1	1	2	3	1	2	3	0.333333	0.5	1	1	1	1	1	1	1	1	2	3	0.333333	0.5	1	0.333333	0.5	1	1	1	1	0.333333	0.5	1	0.333333	0.5	1	0.333333	0.5	1	1	1	1	0.333333	0.5	1	1
X26	2	3	4	2	3	4	3	4	5	3	4	5	1	2	3	2	3	4	2	3	4	3	4	5	1	2	3	1	2	3	2	3	4	1	2	3	1	2	3	1	2	3	2	3	4	1	2	3	3
X27	1	2	3	1	2	3	2	3	4	2	3	4	1	1	1	1	2	3	1	2	3	2	3	4	1	1	1	1	1	1	1	2	3	1	1	1	1	1	1	1	1	1	1	2	3	1	1	1	2
X28	1	2	3	1	2	3	2	3	4	2	3	4	1	1	1	1	2	3	1	2	3	2	3	4	1	1	1	1	1	1	1	2	3	1	1	1	1	1	1	1	1	1	1	2	3	1	1	1	2
X29	1	1	1	1	1	1	1	2	3	1	2	3	0.333333	0.5	1	1	1	1	1	1	1	1	2	3	0.333333	0.5	1	0.333333	0.5	1	1	1	1	0.333333	0.5	1	0.333333	0.5	1	0.333333	0.5	1	1	1	1	0.333333	0.5	1	1
X30	1	1	1	1	1	1	1	2	3	1	2	3	0.333333	0.5	1	1	1	1	1	1	1	1	2	3	0.333333	0.5	1	0.333333	0.5	1	1	1	1	0.333333	0.5	1	0.333333	0.5	1	0.333333	0.5	1	1	1	1	0.333333	0.5	1	1
X31	1	2	3	1	2	3	2	3	4	2	3	4	1	1	1	1	2	3	1	2	3	2	3	4	1	1	1	1	1	1	1	2	3	1	1	1	1	1	1	1	1	1	1	2	3	1	1	1	2
X32	1	2	3	1	2	3	2	3	4	2	3	4	1	1	1	1	2	3	1	2	3	2	3	4	1	1	1	1	1	1	1	2	3	1	1	1	1	1	1	1	1	1	1	2	3	1	1	1	2
X33	1	2	3	1	2	3	2	3	4	2	3	4	1	1	1	1	2	3	1	2	3	2	3	4	1	1	1	1	1	1	1	2	3	1	1	1	1	1	1	1	1	1	1	2	3	1	1	1	2
X34	1	1	1	1	1	1	1	2	3	1	2	3	0.333333	0.5	1	1	1	1	1	1	1	1	2	3	0.333333	0.5	1	0.333333	0.5	1	1	1	1	0.333333	0.5	1	0.333333	0.5	1	0.333333	0.5	1	1	1	1	0.333333	0.5	1	1
X35	1	1	1	1	1	1	1	2	3	1	2	3	0.333333	0.5	1	1	1	1	1	1	1	1	2	3	0.333333	0.5	1	0.333333	0.5	1	1	1	1	0.333333	0.5	1	0.333333	0.5	1	0.333333	0.5	1	1	1	1	0.333333	0.5	1	1
X36	1	2	3	1	2	3	2	3	4	2	3	4	1	1	1	1	2	3	1	2	3	2	3	4	1	1	1	1	1	1	1	2	3	1	1	1	1	1	1	1	1	1	1	2	3	1	1	1	2
X37	3	4	5	3	4	5	4	5	6	4	5	6	2	3	4	3	4	5	3	4	5	4	5	6	2	3	4	2	3	4	3	4	5	2	3	4	2	3	4	2	3	4	3	4	5	2	3	4	4
X38	1	1	1	1	1	1	1	2	3	1	2	3	0.333333	0.5	1	1	1	1	1	1	1	1	2	3	0.333333	0.5	1	0.333333	0.5	1	1	1	1	0.333333	0.5	1	0.333333	0.5	1	0.333333	0.5	1	1	1	1	0.333333	0.5	1	1
X39	1	2	3	1	2	3	2	3	4	2	3	4	1	1	1	1	2	3	1	2	3	2	3	4	1	1	1	1	1	1	1	2	3	1	1	1	1	1	1	1	1	1	1	2	3	1	1	1	2
X40	0.333333	0.5	1	0.333333	0.5	1	1	1	1	1	1	1	0.25	0.333333	0.5	0.333333	0.5	1	0.333333	0.5	1	1	1	1	0.25	0.333333	0.5	0.25	0.333333	0.5	0.333333	0.5	1	0.25	0.333333	0.5	0.25	0.333333	0.5	0.25	0.333333	0.5	0.333333	0.5	1	0.25	0.333333	0.5	1
X41	0.333333	0.5	1	0.333333	0.5	1	1	1	1	1	1	1	0.25	0.333333	0.5	0.333333	0.5	1	0.333333	0.5	1	1	1	1	0.25	0.333333	0.5	0.25	0.333333	0.5	0.333333	0.5	1	0.25	0.333333	0.5	0.25	0.333333	0.5	0.25	0.333333	0.5	0.333333	0.5	1	0.25	0.333333	0.5	1
X42	1	2	3	1	2	3	2	3	4	2	3	4	1	1	1	1	2	3	1	2	3	2	3	4	1	1	1	1	1	1	1	2	3	1	1	1	1	1	1	1	1	1	1	2	3	1	1	1	2
X43	1	2	3	1	2	3	2	3	4	2	3	4	1	1	1	1	2	3	1	2	3	2	3	4	1	1	1	1	1	1	1	2	3	1	1	1	1	1	1	1	1	1	1	2	3	1	1	1	2
X44	2	3	4	2	3	4	3	4	5	3	4	5	1	2	3	2	3	4	2	3	4	3	4	5	1	2	3	1	2	3	2	3	4	1	2	3	1	2	3	1	2	3	2	3	4	1	2	3	3
X45	2	3	4	2	3	4	3	4	5	3	4	5	1	2	3	2	3	4	2	3	4	3	4	5	1	2	3	1	2	3	2	3	4	1	2	3	1	2	3	1	2	3	2	3	4	1	2	3	3
X46	1	2	3	1	2	3	2	3	4	2	3	4	1	1	1	1	2	3	1	2	3	2	3	4	1	1	1	1	1	1	1	2	3	1	1	1	1	1	1	1	1	1	1	2	3	1	1	1	2
X47	2	3	4	2	3	4	3	4	5	3	4	5	1	2	3	2	3	4	2	3	4	3	4	5	1	2	3	1	2	3	2	3	4	1	2	3	1	2	3	1	2	3	2	3	4	1	2	3	3
X48	1	2	3	1	2	3	2	3	4	2	3	4	1	1	1	1	2	3	1	2	3	2	3	4	1	1	1	1	1	1	1	2	3	1	1	1	1	1	1	1	1	1	1	2	3	1	1	1	2
X49	1	2	3	1	2	3	2	3	4	2	3	4	1	1	1	1	2	3	1	2	3	2	3	4	1	1	1	1	1	1	1	2	3	1	1	1	1	1	1	1	1	1	1	2	3	1	1	1	2
X50	1	2	3	1	2	3	2	3	4	2	3	4	1	1	1	1	2	3	1	2	3	2	3	4	1	1	1	1	1	1	1	2	3	1	1	1	1	1	1	1	1	1	1	2	3	1	1	1	2
X51	1	2	3	1	2	3	2	3	4	2	3	4	1	1	1	1	2	3	1	2	3	2	3	4	1	1	1	1	1	1	1	2	3	1	1	1	1	1	1	1	1	1	1	2	3	1	1	1	2
X52	1	2	3	1	2	3	2	3	4	2	3	4	1	1	1	1	2	3	1	2	3	2	3	4	1	1	1	1	1	1	1	2	3	1	1	1	1	1	1	1	1	1	1	2	3	1	1	1	2
		Geometric Mean					Fuzzy Weights			Average	Normalization
	X1	0.915966	0.680069	0.567983		X1	#REF!	#REF!	#REF!	#REF!	#REF!
	X2	0.915966	0.680069	0.567983		X2	#REF!	#REF!	#REF!	#REF!	#REF!
	X3	0.601822	0.409682	0.32292		X3	#REF!	#REF!	#REF!	#REF!	#REF!
	X4	0.601822	0.409682	0.32292		X4	#REF!	#REF!	#REF!	#REF!	#REF!
	X5	1.06892	1.23649	1.35299		X5	#REF!	#REF!	#REF!	#REF!	#REF!
	X6	0.896817	0.680069	0.58011		X6	#REF!	#REF!	#REF!	#REF!	#REF!
	X7	0.896817	0.680069	0.58011		X7	#REF!	#REF!	#REF!	#REF!	#REF!
	X8	0.569283	0.409682	0.341377		X8	#REF!	#REF!	#REF!	#REF!	#REF!
	X9	1.06892	1.26989	1.41138		X9	#REF!	#REF!	#REF!	#REF!	#REF!
	X10	1.06892	1.26989	1.41138		X10	#REF!	#REF!	#REF!	#REF!	#REF!
	X11	0.859712	0.680069	0.605148		X11	#REF!	#REF!	#REF!	#REF!	#REF!
	X12	1.06892	1.26989	1.41138		X12	#REF!	#REF!	#REF!	#REF!	#REF!
	X13	1.06892	1.26989	1.41138		X13	#REF!	#REF!	#REF!	#REF!	#REF!
	X14	1.06892	1.26989	1.41138		X14	#REF!	#REF!	#REF!	#REF!	#REF!
	X15	0.806913	0.680069	0.644744		X15	#REF!	#REF!	#REF!	#REF!	#REF!
	X16	1.06892	1.26989	1.41138		X16	#REF!	#REF!	#REF!	#REF!	#REF!
	X17	0.503783	0.409682	0.385762		X17	#REF!	#REF!	#REF!	#REF!	#REF!
	X18	0.790044	0.680069	0.658511		X18	#REF!	#REF!	#REF!	#REF!	#REF!
	X19	1.06892	1.26989	1.41138		X19	#REF!	#REF!	#REF!	#REF!	#REF!
	X20	1.06892	1.26989	1.41138		X20	#REF!	#REF!	#REF!	#REF!	#REF!
	X21	1.3864	2.21838	2.98216		X21	#REF!	#REF!	#REF!	#REF!	#REF!
	X22	0.763286	0.698443	0.711014		X22	#REF!	#REF!	#REF!	#REF!	#REF!
	X23	0.747329	0.680069	0.69615		X23	#REF!	#REF!	#REF!	#REF!	#REF!
	X24	1.04657	1.26989	1.44152		X24	#REF!	#REF!	#REF!	#REF!	#REF!
	X25	0.731705	0.680069	0.711014		X25	#REF!	#REF!	#REF!	#REF!	#REF!
	X26	1.3864	2.21838	2.98216		X26	#REF!	#REF!	#REF!	#REF!	#REF!
	X27	1.02469	1.26989	1.4723		X27	#REF!	#REF!	#REF!	#REF!	#REF!
	X28	1.01904	1.26003	1.4723		X28	#REF!	#REF!	#REF!	#REF!	#REF!
	X29	0.692144	0.680069	0.751654		X29	#REF!	#REF!	#REF!	#REF!	#REF!
	X30	0.695984	0.685393	0.751654		X30	#REF!	#REF!	#REF!	#REF!	#REF!
	X31	1.02469	1.26989	1.4723		X31	#REF!	#REF!	#REF!	#REF!	#REF!			تقيمم fuzzy ahp		تقييم الاستبيان
	X32	1.02469	1.26989	1.4723		X32	#REF!	#REF!	#REF!	#REF!	#REF!			1		1
	X33	1.01904	1.26003	1.4723		X33	#REF!	#REF!	#REF!	#REF!	#REF!			3		2
	X34	0.649636	0.680069	0.800837		X34	#REF!	#REF!	#REF!	#REF!	#REF!			5		3
	X35	0.65324	0.685393	0.800837		X35	#REF!	#REF!	#REF!	#REF!	#REF!			7		4
	X36	1.04657	1.3042	1.4723		X36	#REF!	#REF!	#REF!	#REF!	#REF!			9		5
	X37	2.18901	3.14548	4.23391		X37	#REF!	#REF!	#REF!	#REF!	#REF!
	X38	0.633332	0.685393	0.826011		X38	#REF!	#REF!	#REF!	#REF!	#REF!
	X39	1.00124	1.25308	1.49205		X39	#REF!	#REF!	#REF!	#REF!	#REF!
	X40	0.354695	0.409682	0.547908		X40	#REF!	#REF!	#REF!	#REF!	#REF!
	X41	0.358197	0.41518	0.547908		X41	#REF!	#REF!	#REF!	#REF!	#REF!
	X42	1.01113	1.26989	1.49205		X42	#REF!	#REF!	#REF!	#REF!	#REF!
	X43	1.03272	1.28693	1.49205		X43	#REF!	#REF!	#REF!	#REF!	#REF!
	X44	1.35741	2.21838	3.04584		X44	#REF!	#REF!	#REF!	#REF!	#REF!
	X45	1.32904	2.18901	3.04584		X45	#REF!	#REF!	#REF!	#REF!	#REF!
	X46	0.989988	1.28693	1.55645		X46	#REF!	#REF!	#REF!	#REF!	#REF!
	X47	1.32904	2.18901	3.04584		X47	#REF!	#REF!	#REF!	#REF!	#REF!
	X48	0.949028	1.26989	1.58968		X48	#REF!	#REF!	#REF!	#REF!	#REF!
	X49	0.949028	1.26989	1.58968		X49	#REF!	#REF!	#REF!	#REF!	#REF!
	X50	0.949028	1.26989	1.58968		X50	#REF!	#REF!	#REF!	#REF!	#REF!
	X51	0.949028	1.26989	1.58968		X51	#REF!	#REF!	#REF!	#REF!	#REF!
	X52	#REF!	1.29332	1.58968		X52	#REF!	#REF!	#REF!	#REF!	#REF!
	Sum	#REF!	58.6468	68.9587		Total Average				#REF!	#REF!
	Inverse	#REF!	0.0170512	0.0145014
	Arrange	#REF!	#REF!	#REF!
[truncated: 107 more columns]

## Sheet: N (1)
	اسم الشركة	نوع الشركة	هل معتمدة ب ISO9000	تخصص الشركة	سنة التأسيس	المنصب	الدرجة العلمية الحاصل عليها	سنوات الخبرة في مجال العمل	عدد المشاريع المنفذة خلال الخمس سنوات الماضية	قيمة المشاريع المنفذة خلال الخمس سنوات الماضية (مليون جنيه مصرى)	قيمة المشروع الحالي	هل تطبق الشركة التي تعمل بها مفاهيم إدارة المشاريع ولديها نظام إدارة الجودة (QMS)	هل لديك أي علاقة بأنشطة إدارة الجودة ؟	1- طريقة تسليم المشروع أي الأجراء المحدد لإنهاء الخدمة التي يختارها العميل مثل ((Design-bid-build(DBB)/Design-build (DB)/Construction Manager at risk(CMAR)/Job order contracting /Fast track)	2- نوع العقد أي طريقة التعاقد بين الجهات المعنيه مثل (Unit price/ Lumpsum/ Cost plus fixed fee / Cost plus percentage fee/ Target cost / Other contract)	3- فئة المقاول أي درجة تصنيف المقاول طبقا لنظام تصنيف المقاولين مثل (درجة أولي - درجة ثانية - أخرى )	4- مدة المشروع أي التأخير عن الجدول الزمني المخطط لتسليم المشروع	5- موقع المشروع أي تأثير الاختيار الامثل لمكان المشروع	1- عدم متابعة العمل من قبل المشاركين في المشروع ( أي عدم قيام أطرف المشروع بمتابعه الاعمال بشكل دوري وعمل تقارير حول ما تم إنجازه )	2- عدم كفايه مواد البناء والمعدات وقطع الغيار ( أي النقص في الموارد المطلوبة وأعمال الصيانة )	3- عدم خبرة مديرين المشاريع، وفريق الإشراف في تحديد الاحتياجات ومتطلبات العمل ( أي عدم القدرة علي تحقيق التوازن بين مختلف المصالح والاحتياجات لأفراد فريق المشروع وأصحاب المصلحة )	4- عدم معرفةمدير مشروع بالتقنيات المناسبة ( أي هل تؤثر عدم معرفةمدير مشروع بالمهارات الفنية والتقنية علي تكلفة الجودة الرديئة ام معرفته بالمهارات الإدارية فقط )	5- المشاكل المتعلقة بالبيئه المحيطه للمشروع ( أي المشاكل المتعلقة بنظام البيئة مثل الهواء والماء والتربة وما إلي ذلك التي نشأت نتيجة للتدخل البشري أو سوء معاملة الأرض )	6- الخلافات والنزاعات بين المشاركين في المشروع ( أي الخلاف بين طرفي العقد بخصوص عقد المشروع او أحدي وثائقه )	7- ضعف تقنيات التخطيط والرقابة ( أي عدم تحقيق الأهداف المرسومة في ظل تحقيق الكفاءة في استخدام الموارد المتاحة )	8- عدم التنسيق بين المصممين والمقاولين ( أي عدم التنسيق بين الأطراف المشاركة لضمان التنفيذ الناجح لجميع المراحل وفقاً للأهداف المخططة )	9- عدم سرعة اتخاذ القرار بمشاركة جميع أطراف المشروع ( أي عدم القدرة علي رؤية الاختيارات المتاحة بوضوح )	10- نقص في تدريب الموارد البشرية على المهارات التي يتطلبها المشروع ( أي قله تدريب و تعزيز مهارات الموظفين لتطوير مهاراتهم وإمكانيتهم )	11- عدم التزام الإدارة بالتحسين المستمر للجودة ( أي قلة العمل علي تطوير العمليات والأنشطة المتعلقة بالالأت و المواد والأفراد وطرق الأنتاج بشكل مستمر )	12- عدم حساب تكلفة الجودة المخططة للمشروع ( أي عدم حساب التكاليف التي تتكبدها الشركة للتأكد من أن منتجاتها أو خدمتها تلبي معايير الجودة المطلوبة )	13- عدم خبرة فريق الإشراف ( أي عدم كفاءة التوجيه والإشراف علي الأعمال )	14- ترددمدير مشروع في اتخاذ القرار المالي ( أي عدم قدرةمدير مشروع في اي تغيير او تعديل علي سبيل المثال تغيير الميزانية المقدرة للمشروع )	15- التردد في اتخاذ القرار في الوقت المناسب من قبلمدير مشروع ( أي المماطلة المزمنة عند إتخاذ القرارات )	16- ضعف الإشراف ومتابعة العمل خلال ساعات العمل الإضافية ( أي ضعف تتبع ساعات نظام العمل الإضافي )	17- عدم مطابقة أهداف الجودة للمعايير والمواصفات ( أي عدم المطابقة لمتطلبات و مواصفات او خصائص معينة قادرة علي الوفاء بالمعايير والمتطلبات المتعارف عليها في المؤسسات المماثلة )	18- ضعف القيادة الفعالة لإدارة المشروع ( أي عدم القدرة علي توجيه وتحفيز الأفراد لتحقيق أهداف محددة )	19- عدم استخدام القوى العاملة الماهرة في التنفيذ ( أي تعيين عمالة بخبرات ضعيفة في أعمال التنفيذ )	20- عدم تخطيط التدفق النقدي ( أي عدم تطبيق نظام لمتابعة حركة الأموال داخل الشركة كل شهر اوخلال فترة معينة )	21- عدم وضوح الهيكل التنظيمي للعاملين بالمشروع ( أي عدم توضيح التنظيم والهيكل الإدراي للمؤسسة وتوزيع المهامات بفاعلية )	22- عدم استخدام أنظمة المشتريات المتكاملة ( أي ضعف ادارة عملية الشراء وعدم تحديد اهم احتياجات المنظمة )	23- ضعف التركيز علي عملية النفقات والمشتريات ( أي عدم متابعة الميزانية والتدفق النقدي )	24- ضعف الإنتاجية ( أي عدم إيجاد نظم وحلول جديدة لاستغلال الموارد المتاحة لتحقيق اعلي جودة في أفضل وقت وبأقل تكاليف ممكنة )	25- ضعف جودة الموارد المستخدمة ( أي عدم مطابقة الموارد للمواصفات و المعايير الفنية )	26- الفجوة بين الجدول الزمني المخطط والفعلي ( أي وجود فرق بين الوقت المخطط والوقت الفعلي المستغرق لإتمام المشروع )	27- الفجوة بين التكلفة المخططة والتكلفة الفعلية ( أي وجود فرق بين التكلفة المخططة والتكلفة الفعلية لإتمام المشروع )	28- الفجوة بين الهدف المخطط والفعلي ( أي وجود اختلاف بين الأداء الفعلي و الأداء المتوقع مستقبليأ للمؤسسة )	1- إهدار الموارد في الموقع ( أي إستخدام الموارد سواء مواد او ومعدات او عمالة بشكل غير جيد )	2- نقص الخبرة والموارد الفنية والمهنية لأداء المهمة ( أي ضعف المهارات لتقييم متطلبات المشروع وتحقيق النتايج المطلوبة )	3- عدم الوعي بالجودة لفريق المشروع ( أي عدم فهم قيمة الجودة والدقة في العمل لتقديم الخدمة بأفضل طريقة )
1	شركة العبد للمقاولات	خاصة	نعم	مقاول	1917	مدير المشروع	ماجيستير	من 10 إلي 15سنة	من 10 إلي أقل من 20	أكثر من 500	750 مليون جنية مصري	نعم	نعم	4	4	5	5	3	4	4	5	3	3	4	3	3	3	4	3	5	4	3	3	2	4	4	3	4	2	3	3	4	4	3	3	3	4	4	3
													1	X1	X2	X3	X4	X5	X6	X7	X8	X9	X10	X11	X12	X13	X14	X15	X16	X17	X18	X19	X20	X21	X22	X23	X24	X25	X26	X27	X28	X29	X30	X31	X32	X33	X34	X35	X36
														4	4	5	5	3	4	4	5	3	3	4	3	3	3	4	3	5	4	3	3	2	4	4	3	4	2	3	3	4	4	3	3	3	4	4	3
	X1			X2			X3			X4			X5			X6			X7			X8			X9			X10			X11			X12			X13			X14			X15			X16			X17
X1	1	1	1	1	1	1	1	0.5	0.333333	1	0.5	0.333333	1	2	3	1	1	1	1	1	1	1	0.5	0.333333	1	2	3	1	2	3	1	1	1	1	2	3	1	2	3	1	2	3	1	1	1	1	2	3	1
X2	1	1	1	1	1	1	1	0.5	0.333333	1	0.5	0.333333	1	2	3	1	1	1	1	1	1	1	0.5	0.333333	1	2	3	1	2	3	1	1	1	1	2	3	1	2	3	1	2	3	1	1	1	1	2	3	1
X3	1	2	3	1	2	3	1	1	1	1	1	1	2	3	4	1	2	3	1	2	3	1	1	1	2	3	4	2	3	4	1	2	3	2	3	4	2	3	4	2	3	4	1	2	3	2	3	4	1
X4	1	2	3	1	2	3	1	1	1	1	1	1	2	3	4	1	2	3	1	2	3	1	1	1	2	3	4	2	3	4	1	2	3	2	3	4	2	3	4	2	3	4	1	2	3	2	3	4	1
X5	0.333333	0.5	1	0.333333	0.5	1	0.25	0.333333	0.5	0.25	0.333333	0.5	1	1	1	1	0.5	0.333333	1	0.5	0.333333	0.5	0.333333	0.25	1	1	1	1	1	1	1	0.5	0.333333	1	1	1	1	1	1	1	1	1	1	0.5	0.333333	1	1	1	0.5
X6	1	1	1	1	1	1	0.333333	0.5	1	0.333333	0.5	1	1	2	3	1	1	1	1	1	1	1	0.5	0.333333	1	2	3	1	2	3	1	1	1	1	2	3	1	2	3	1	2	3	1	1	1	1	2	3	1
X7	1	1	1	1	1	1	0.333333	0.5	1	0.333333	0.5	1	1	2	3	1	1	1	1	1	1	1	0.5	0.333333	1	2	3	1	2	3	1	1	1	1	2	3	1	2	3	1	2	3	1	1	1	1	2	3	1
X8	1	2	3	1	2	3	1	1	1	1	1	1	2	3	4	1	2	3	1	2	3	1	1	1	2	3	4	2	3	4	1	2	3	2	3	4	2	3	4	2	3	4	1	2	3	2	3	4	1
X9	0.333333	0.5	1	0.333333	0.5	1	0.25	0.333333	0.5	0.25	0.333333	0.5	1	1	1	0.333333	0.5	1	0.333333	0.5	1	0.25	0.333333	0.5	1	1	1	1	1	1	1	0.5	0.333333	1	1	1	1	1	1	1	1	1	1	0.5	0.333333	1	1	1	0.5
X10	0.333333	0.5	1	0.333333	0.5	1	0.25	0.333333	0.5	0.25	0.333333	0.5	1	1	1	0.333333	0.5	1	0.333333	0.5	1	0.25	0.333333	0.5	1	1	1	1	1	1	1	0.5	0.333333	1	1	1	1	1	1	1	1	1	1	0.5	0.333333	1	1	1	0.5
X11	1	1	1	1	1	1	0.333333	0.5	1	0.333333	0.5	1	1	2	3	1	1	1	1	1	1	0.333333	0.5	1	1	2	3	1	2	3	1	1	1	1	2	3	1	2	3	1	2	3	1	1	1	1	2	3	1
X12	0.333333	0.5	1	0.333333	0.5	1	0.25	0.333333	0.5	0.25	0.333333	0.5	1	1	1	0.333333	0.5	1	0.333333	0.5	1	0.25	0.333333	0.5	1	1	1	1	1	1	0.333333	0.5	1	1	1	1	1	1	1	1	1	1	1	0.5	0.333333	1	1	1	0.5
X13	0.333333	0.5	1	0.333333	0.5	1	0.25	0.333333	0.5	0.25	0.333333	0.5	1	1	1	0.333333	0.5	1	0.333333	0.5	1	0.25	0.333333	0.5	1	1	1	1	1	1	0.333333	0.5	1	1	1	1	1	1	1	1	1	1	1	0.5	0.333333	1	1	1	0.5
X14	0.333333	0.5	1	0.333333	0.5	1	0.25	0.333333	0.5	0.25	0.333333	0.5	1	1	1	0.333333	0.5	1	0.333333	0.5	1	0.25	0.333333	0.5	1	1	1	1	1	1	0.333333	0.5	1	1	1	1	1	1	1	1	1	1	1	0.5	0.333333	1	1	1	0.5
X15	1	1	1	1	1	1	0.333333	0.5	1	0.333333	0.5	1	1	2	3	1	1	1	1	1	1	0.333333	0.5	1	1	2	3	1	2	3	1	1	1	1	2	3	1	2	3	1	2	3	1	1	1	1	2	3	1
X16	0.333333	0.5	1	0.333333	0.5	1	0.25	0.333333	0.5	0.25	0.333333	0.5	1	1	1	0.333333	0.5	1	0.333333	0.5	1	0.25	0.333333	0.5	1	1	1	1	1	1	0.333333	0.5	1	1	1	1	1	1	1	1	1	1	0.333333	0.5	1	1	1	1	0.5
X17	1	2	3	1	2	3	1	1	1	1	1	1	2	3	4	1	2	3	1	2	3	1	1	1	2	3	4	2	3	4	1	2	3	2	3	4	2	3	4	2	3	4	1	2	3	2	3	4	1
X18	1	1	1	1	1	1	0.333333	0.5	1	0.333333	0.5	1	1	2	3	1	1	1	1	1	1	0.333333	0.5	1	1	2	3	1	2	3	1	1	1	1	2	3	1	2	3	1	2	3	1	1	1	1	2	3	0.333333
X19	0.333333	0.5	1	0.333333	0.5	1	0.25	0.333333	0.5	0.25	0.333333	0.5	1	1	1	0.333333	0.5	1	0.333333	0.5	1	0.25	0.333333	0.5	1	1	1	1	1	1	0.333333	0.5	1	1	1	1	1	1	1	1	1	1	0.333333	0.5	1	1	1	1	0.25
X20	0.333333	0.5	1	0.333333	0.5	1	0.25	0.333333	0.5	0.25	0.333333	0.5	1	1	1	0.333333	0.5	1	0.333333	0.5	1	0.25	0.333333	0.5	1	1	1	1	1	1	0.333333	0.5	1	1	1	1	1	1	1	1	1	1	0.333333	0.5	1	1	1	1	0.25
X21	0.25	0.333333	0.5	0.25	0.333333	0.5	0.2	0.25	0.333333	0.2	0.25	0.333333	0.333333	0.5	1	0.25	0.333333	0.5	0.25	0.333333	0.5	0.2	0.25	0.333333	0.333333	0.5	1	0.333333	0.5	1	0.25	0.333333	0.5	0.333333	0.5	1	0.333333	0.5	1	0.333333	0.5	1	0.25	0.333333	0.5	0.333333	0.5	1	0.2
X22	1	1	1	1	1	1	0.333333	0.5	1	0.333333	0.5	1	1	2	3	1	1	1	1	1	1	0.333333	0.5	1	1	2	3	1	2	3	1	1	1	1	2	3	1	2	3	1	2	3	1	1	1	1	2	3	0.333333
X23	1	1	1	1	1	1	0.333333	0.5	1	0.333333	0.5	1	1	2	3	1	1	1	1	1	1	0.333333	0.5	1	1	2	3	1	2	3	1	1	1	1	2	3	1	2	3	1	2	3	1	1	1	1	2	3	0.333333
X24	0.333333	0.5	1	0.333333	0.5	1	0.25	0.333333	0.5	0.25	0.333333	0.5	1	1	1	0.333333	0.5	1	0.333333	0.5	1	0.25	0.333333	0.5	1	1	1	1	1	1	0.333333	0.5	1	1	1	1	1	1	1	1	1	1	0.333333	0.5	1	1	1	1	0.25
X25	1	1	1	1	1	1	0.333333	0.5	1	0.333333	0.5	1	1	2	3	1	1	1	1	1	1	0.333333	0.5	1	1	2	3	1	2	3	1	1	1	1	2	3	1	2	3	1	2	3	1	1	1	1	2	3	0.333333
X26	0.25	0.333333	0.5	0.25	0.333333	0.5	0.2	0.25	0.333333	0.2	0.25	0.333333	0.333333	0.5	1	0.25	0.333333	0.5	0.25	0.333333	0.5	0.2	0.25	0.333333	0.333333	0.5	1	0.333333	0.5	1	0.25	0.333333	0.5	0.333333	0.5	1	0.333333	0.5	1	0.333333	0.5	1	0.25	0.333333	0.5	0.333333	0.5	1	0.2
X27	0.333333	0.5	1	0.333333	0.5	1	0.25	0.333333	0.5	0.25	0.333333	0.5	1	1	1	0.333333	0.5	1	0.333333	0.5	1	0.25	0.333333	0.5	1	1	1	1	1	1	0.333333	0.5	1	1	1	1	1	1	1	1	1	1	0.333333	0.5	1	1	1	1	0.25
X28	0.333333	0.5	1	0.333333	0.5	1	0.25	0.333333	0.5	0.25	0.333333	0.5	1	1	1	0.333333	0.5	1	0.333333	0.5	1	0.25	0.333333	0.5	1	1	1	1	1	1	0.333333	0.5	1	1	1	1	1	1	1	1	1	1	0.333333	0.5	1	1	1	1	0.25
X29	1	1	1	1	1	1	0.333333	0.5	1	0.333333	0.5	1	1	2	3	1	1	1	1	1	1	0.333333	0.5	1	1	2	3	1	2	3	1	1	1	1	2	3	1	2	3	1	2	3	1	1	1	1	2	3	0.333333
X30	1	1	1	1	1	1	0.333333	0.5	1	0.333333	0.5	1	1	2	3	1	1	1	1	1	1	0.333333	0.5	1	1	2	3	1	2	3	1	1	1	1	2	3	1	2	3	1	2	3	1	1	1	1	2	3	0.333333
X31	0.333333	0.5	1	0.333333	0.5	1	0.25	0.333333	0.5	0.25	0.333333	0.5	1	1	1	0.333333	0.5	1	0.333333	0.5	1	0.25	0.333333	0.5	1	1	1	1	1	1	0.333333	0.5	1	1	1	1	1	1	1	1	1	1	0.333333	0.5	1	1	1	1	0.25
X32	0.333333	0.5	1	0.333333	0.5	1	0.25	0.333333	0.5	0.25	0.333333	0.5	1	1	1	0.333333	0.5	1	0.333333	0.5	1	0.25	0.333333	0.5	1	1	1	1	1	1	0.333333	0.5	1	1	1	1	1	1	1	1	1	1	0.333333	0.5	1	1	1	1	0.25
X33	0.333333	0.5	1	0.333333	0.5	1	0.25	0.333333	0.5	0.25	0.333333	0.5	1	1	1	0.333333	0.5	1	0.333333	0.5	1	0.25	0.333333	0.5	1	1	1	1	1	1	0.333333	0.5	1	1	1	1	1	1	1	1	1	1	0.333333	0.5	1	1	1	1	0.25
X34	1	1	1	1	1	1	0.333333	0.5	1	0.333333	0.5	1	1	2	3	1	1	1	1	1	1	0.333333	0.5	1	1	2	3	1	2	3	1	1	1	1	2	3	1	2	3	1	2	3	1	1	1	1	2	3	0.333333
X35	1	1	1	1	1	1	0.333333	0.5	1	0.333333	0.5	1	1	2	3	1	1	1	1	1	1	0.333333	0.5	1	1	2	3	1	2	3	1	1	1	1	2	3	1	2	3	1	2	3	1	1	1	1	2	3	0.333333
X36	0.333333	0.5	1	0.333333	0.5	1	0.25	0.333333	0.5	0.25	0.333333	0.5	1	1	1	0.333333	0.5	1	0.333333	0.5	1	0.25	0.333333	0.5	1	1	1	1	1	1	0.333333	0.5	1	1	1	1	1	1	1	1	1	1	0.333333	0.5	1	1	1	1	0.25
X37	0.2	0.25	0.333333	0.2	0.25	0.333333	0.166667	0.2	0.25	0.166667	0.2	0.25	0.25	0.333333	0.5	0.2	0.25	0.333333	0.2	0.25	0.333333	0.166667	0.2	0.25	0.25	0.333333	0.5	0.25	0.333333	0.5	0.2	0.25	0.333333	0.25	0.333333	0.5	0.25	0.333333	0.5	0.25	0.333333	0.5	0.2	0.25	0.333333	0.25	0.333333	0.5	0.166667
X38	1	1	1	1	1	1	0.333333	0.5	1	0.333333	0.5	1	1	2	3	1	1	1	1	1	1	0.333333	0.5	1	1	2	3	1	2	3	1	1	1	1	2	3	1	2	3	1	2	3	1	1	1	1	2	3	0.333333
X39	0.333333	0.5	1	0.333333	0.5	1	0.25	0.333333	0.5	0.25	0.333333	0.5	1	1	1	0.333333	0.5	1	0.333333	0.5	1	0.25	0.333333	0.5	1	1	1	1	1	1	0.333333	0.5	1	1	1	1	1	1	1	1	1	1	0.333333	0.5	1	1	1	1	0.25
X40	1	2	3	1	2	3	1	1	1	1	1	1	2	3	4	1	2	3	1	2	3	1	1	1	2	3	4	2	3	4	1	2	3	2	3	4	2	3	4	2	3	4	1	2	3	2	3	4	1
X41	1	2	3	1	2	3	1	1	1	1	1	1	2	3	4	1	2	3	1	2	3	1	1	1	2	3	4	2	3	4	1	2	3	2	3	4	2	3	4	2	3	4	1	2	3	2	3	4	1
X42	0.333333	0.5	1	0.333333	0.5	1	0.25	0.333333	0.5	0.25	0.333333	0.5	1	1	1	0.333333	0.5	1	0.333333	0.5	1	0.25	0.333333	0.5	1	1	1	1	1	1	0.333333	0.5	1	1	1	1	1	1	1	1	1	1	0.333333	0.5	1	1	1	1	0.25
X43	0.333333	0.5	1	0.333333	0.5	1	0.25	0.333333	0.5	0.25	0.333333	0.5	1	1	1	0.333333	0.5	1	0.333333	0.5	1	0.25	0.333333	0.5	1	1	1	1	1	1	0.333333	0.5	1	1	1	1	1	1	1	1	1	1	0.333333	0.5	1	1	1	1	0.25
X44	0.25	0.333333	0.5	0.25	0.333333	0.5	0.2	0.25	0.333333	0.2	0.25	0.333333	0.333333	0.5	1	0.25	0.333333	0.5	0.25	0.333333	0.5	0.2	0.25	0.333333	0.333333	0.5	1	0.333333	0.5	1	0.25	0.333333	0.5	0.333333	0.5	1	0.333333	0.5	1	0.333333	0.5	1	0.25	0.333333	0.5	0.333333	0.5	1	0.2
X45	0.25	0.333333	0.5	0.25	0.333333	0.5	0.2	0.25	0.333333	0.2	0.25	0.333333	0.333333	0.5	1	0.25	0.333333	0.5	0.25	0.333333	0.5	0.2	0.25	0.333333	0.333333	0.5	1	0.333333	0.5	1	0.25	0.333333	0.5	0.333333	0.5	1	0.333333	0.5	1	0.333333	0.5	1	0.25	0.333333	0.5	0.333333	0.5	1	0.2
X46	0.333333	0.5	1	0.333333	0.5	1	0.25	0.333333	0.5	0.25	0.333333	0.5	1	1	1	0.333333	0.5	1	0.333333	0.5	1	0.25	0.333333	0.5	1	1	1	1	1	1	0.333333	0.5	1	1	1	1	1	1	1	1	1	1	0.333333	0.5	1	1	1	1	0.25
X47	0.25	0.333333	0.5	0.25	0.333333	0.5	0.2	0.25	0.333333	0.2	0.25	0.333333	0.333333	0.5	1	0.25	0.333333	0.5	0.25	0.333333	0.5	0.2	0.25	0.333333	0.333333	0.5	1	0.333333	0.5	1	0.25	0.333333	0.5	0.333333	0.5	1	0.333333	0.5	1	0.333333	0.5	1	0.25	0.333333	0.5	0.333333	0.5	1	0.2
X48	0.333333	0.5	1	0.333333	0.5	1	0.25	0.333333	0.5	0.25	0.333333	0.5	1	1	1	0.333333	0.5	1	0.333333	0.5	1	0.25	0.333333	0.5	1	1	1	1	1	1	0.333333	0.5	1	1	1	1	1	1	1	1	1	1	0.333333	0.5	1	1	1	1	0.25
X49	0.333333	0.5	1	0.333333	0.5	1	0.25	0.333333	0.5	0.25	0.333333	0.5	1	1	1	0.333333	0.5	1	0.333333	0.5	1	0.25	0.333333	0.5	1	1	1	1	1	1	0.333333	0.5	1	1	1	1	1	1	1	1	1	1	0.333333	0.5	1	1	1	1	0.25
X50	0.333333	0.5	1	0.333333	0.5	1	0.25	0.333333	0.5	0.25	0.333333	0.5	1	1	1	0.333333	0.5	1	0.333333	0.5	1	0.25	0.333333	0.5	1	1	1	1	1	1	0.333333	0.5	1	1	1	1	1	1	1	1	1	1	0.333333	0.5	1	1	1	1	0.25
X51	0.333333	0.5	1	0.333333	0.5	1	0.25	0.333333	0.5	0.25	0.333333	0.5	1	1	1	0.333333	0.5	1	0.333333	0.5	1	0.25	0.333333	0.5	1	1	1	1	1	1	0.333333	0.5	1	1	1	1	1	1	1	1	1	1	0.333333	0.5	1	1	1	1	0.25
X52	0.333333	0.5	1	0.333333	0.5	1	0.25	0.333333	0.5	0.25	0.333333	0.5	1	1	1	0.333333	0.5	1	0.333333	0.5	1	0.25	0.333333	0.5	1	1	1	1	1	1	0.333333	0.5	1	1	1	1	1	1	1	1	1	1	0.333333	0.5	1	1	1	1	0.25
		Geometric Mean					Fuzzy Weights			Average	Normalization
	X1	1.09174	1.47044	1.76062		X1	0.0146857	0.0249764	0.0389743	0.0262121	0.0241712
	X2	1.09174	1.47044	1.76062		X2	0.0146857	0.0249764	0.0389743	0.0262121	0.0241712
	X3	1.59287	2.44092	3.2304		X3	0.0214267	0.0414606	0.0715104	0.0447993	0.041311
	X4	1.59287	2.44092	3.2304		X4	0.0214267	0.0414606	0.0715104	0.0447993	0.041311
	X5	0.873225	0.787467	0.759075		X5	0.0117463	0.0133757	0.0168034	0.0139751	0.012887
	X6	1.04657	1.47044	1.8366		X6	0.0140781	0.0249764	0.0406564	0.0265703	0.0245014
	X7	1.04657	1.47044	1.8366		X7	0.0140781	0.0249764	0.0406564	0.0265703	0.0245014
	X8	1.59287	2.44092	3.2304		X8	0.0214267	0.0414606	0.0715104	0.0447993	0.041311
	X9	0.826011	0.787467	0.802462		X9	0.0111112	0.0133757	0.0177639	0.0140836	0.012987
	X10	0.826011	0.787467	0.802462		X10	0.0111112	0.0133757	0.0177639	0.0140836	0.012987
	X11	1.02469	1.47044	1.87582		X11	0.0137838	0.0249764	0.0415245	0.0267616	0.0246778
	X12	0.808743	0.787467	0.819596		X12	0.0108789	0.0133757	0.0181432	0.0141326	0.0130322
	X13	0.808743	0.787467	0.819596		X13	0.0108789	0.0133757	0.0181432	0.0141326	0.0130322
	X14	0.808743	0.787467	0.819596		X14	0.0108789	0.0133757	0.0181432	0.0141326	0.0130322
	X15	1.02469	1.47044	1.87582		X15	0.0137838	0.0249764	0.0415245	0.0267616	0.0246778
	X16	0.791836	0.787467	0.837096		X16	0.0106515	0.0133757	0.0185306	0.0141859	0.0130813
	X17	1.59287	2.44092	3.2304		X17	0.0214267	0.0414606	0.0715104	0.0447993	0.041311
	X18	1.00327	1.47044	1.91587		X18	0.0134956	0.0249764	0.0424111	0.0269611	0.0248618
	X19	0.765016	0.787467	0.866442		X19	0.0102907	0.0133757	0.0191802	0.0142822	0.0131701
	X20	0.765016	0.787467	0.866442		X20	0.0102907	0.0133757	0.0191802	0.0142822	0.0131701
	X21	0.52233	0.450779	0.463059		X21	0.00702618	0.00765678	0.0102506	0.00831119	0.00766405
	X22	1.00327	1.47044	1.91587		X22	0.0134956	0.0249764	0.0424111	0.0269611	0.0248618
	X23	1.00327	1.47044	1.91587		X23	0.0134956	0.0249764	0.0424111	0.0269611	0.0248618
	X24	0.733365	0.787467	0.903838		X24	0.00986495	0.0133757	0.020008	0.0144162	0.0132937
	X25	1.00327	1.47044	1.91587		X25	0.0134956	0.0249764	0.0424111	0.0269611	0.0248618
	X26	0.491363	0.450779	0.492242		X26	0.00660963	0.00765678	0.0108966	0.00838768	0.00773458
	X27	0.718033	0.787467	0.923136		X27	0.00965872	0.0133757	0.0204352	0.0144899	0.0133616
	X28	0.718033	0.793632	0.923136		X28	0.00965872	0.0134804	0.0204352	0.0145248	0.0133938
	X29	1.00327	1.47044	1.91587		X29	0.0134956	0.0249764	0.0424111	0.0269611	0.0248618
	X30	1.00327	1.45902	1.91587		X30	0.0134956	0.0247824	0.0424111	0.0268964	0.0248021
	X31	0.688325	0.787467	0.962978		X31	0.00925909	0.0133757	0.0213172	0.0146506	0.0135099			تقيمم fuzzy ahp		تقييم الاستبيان
	X32	0.688325	0.787467	0.962978		X32	0.00925909	0.0133757	0.0213172	0.0146506	0.0135099			1		1
	X33	0.688325	0.793632	0.962978		X33	0.00925909	0.0134804	0.0213172	0.0146856	0.0135421			3		2
	X34	1.00327	1.47044	1.91587		X34	0.0134956	0.0249764	0.0424111	0.0269611	0.0248618			5		3
	X35	1.00327	1.45902	1.91587		X35	0.0134956	0.0247824	0.0424111	0.0268964	0.0248021			7		4
	X36	0.659847	0.766751	1.00454		X36	0.00887601	0.0130238	0.0222372	0.0147123	0.0135668			9		5
	X37	0.291021	0.317916	0.361001		X37	0.00391471	0.00540002	0.00799137	0.0057687	0.00531953
	X38	1.00327	1.45902	1.91587		X38	0.0134956	0.0247824	0.0424111	0.0268964	0.0248021
	X39	0.646052	0.798034	1.02599		X39	0.00869045	0.0135552	0.022712	0.0149859	0.013819
	X40	1.59287	2.44092	3.2304		X40	0.0214267	0.0414606	0.0715104	0.0447993	0.041311
	X41	1.59287	2.4086	3.2304		X41	0.0214267	0.0409116	0.0715104	0.0446163	0.0411423
	X42	0.629056	0.787467	1.05371		X42	0.00846183	0.0133757	0.0233257	0.0150544	0.0138822
	X43	0.629056	0.77704	1.05371		X43	0.00846183	0.0131986	0.0233257	0.0149954	0.0138278
	X44	0.372688	0.450779	0.648985		X44	0.00501326	0.00765678	0.0143664	0.00901215	0.00831043
	X45	0.372688	0.456828	0.648985		X45	0.00501326	0.00775953	0.0143664	0.0090464	0.00834201
	X46	0.629056	0.77704	1.05371		X46	0.00846183	0.0131986	0.0233257	0.0149954	0.0138278
	X47	0.364897	0.456828	0.662842		X47	0.00490846	0.00775953	0.0146732	0.00911372	0.00840409
	X48	0.629056	0.787467	1.05371		X48	0.00846183	0.0133757	0.0233257	0.0150544	0.0138822
	X49	0.629056	0.787467	1.05371		X49	0.00846183	0.0133757	0.0233257	0.0150544	0.0138822
	X50	0.629056	0.787467	1.05371		X50	0.00846183	0.0133757	0.0233257	0.0150544	0.0138822
	X51	0.629056	0.787467	1.05371		X51	0.00846183	0.0133757	0.0233257	0.0150544	0.0138822
	X52	0.629056	0.773206	1.05371		X52	0.00846183	0.0131334	0.0233257	0.0149736	0.0138077
	Sum	45.1738	58.8731	74.3405		Total Average				1.08444	1
	Inverse	0.0221367	0.0169857	0.0134516
	Arrange	0.0134516	0.0169857	0.0221367
[truncated: 107 more columns]

## Sheet: N (2)
	اسم الشركة	نوع الشركة	هل معتمدة ب ISO9000	تخصص الشركة	سنة التأسيس	المنصب	الدرجة العلمية الحاصل عليها	سنوات الخبرة في مجال العمل	عدد المشاريع المنفذة خلال الخمس سنوات الماضية	قيمة المشاريع المنفذة خلال الخمس سنوات الماضية (مليون جنيه مصرى)	قيمة المشروع الحالي	هل تطبق الشركة التي تعمل بها مفاهيم إدارة المشاريع ولديها نظام إدارة الجودة (QMS)	هل لديك أي علاقة بأنشطة إدارة الجودة ؟	1- طريقة تسليم المشروع أي الأجراء المحدد لإنهاء الخدمة التي يختارها العميل مثل ((Design-bid-build(DBB)/Design-build (DB)/Construction Manager at risk(CMAR)/Job order contracting /Fast track)	2- نوع العقد أي طريقة التعاقد بين الجهات المعنيه مثل (Unit price/ Lumpsum/ Cost plus fixed fee / Cost plus percentage fee/ Target cost / Other contract)	3- فئة المقاول أي درجة تصنيف المقاول طبقا لنظام تصنيف المقاولين مثل (درجة أولي - درجة ثانية - أخرى )	4- مدة المشروع أي التأخير عن الجدول الزمني المخطط لتسليم المشروع	5- موقع المشروع أي تأثير الاختيار الامثل لمكان المشروع	1- عدم متابعة العمل من قبل المشاركين في المشروع ( أي عدم قيام أطرف المشروع بمتابعه الاعمال بشكل دوري وعمل تقارير حول ما تم إنجازه )	2- عدم كفايه مواد البناء والمعدات وقطع الغيار ( أي النقص في الموارد المطلوبة وأعمال الصيانة )	3- عدم خبرة مديرين المشاريع، وفريق الإشراف في تحديد الاحتياجات ومتطلبات العمل ( أي عدم القدرة علي تحقيق التوازن بين مختلف المصالح والاحتياجات لأفراد فريق المشروع وأصحاب المصلحة )	4- عدم معرفةمدير مشروع بالتقنيات المناسبة ( أي هل تؤثر عدم معرفةمدير مشروع بالمهارات الفنية والتقنية علي تكلفة الجودة الرديئة ام معرفته بالمهارات الإدارية فقط )	5- المشاكل المتعلقة بالبيئه المحيطه للمشروع ( أي المشاكل المتعلقة بنظام البيئة مثل الهواء والماء والتربة وما إلي ذلك التي نشأت نتيجة للتدخل البشري أو سوء معاملة الأرض )	6- الخلافات والنزاعات بين المشاركين في المشروع ( أي الخلاف بين طرفي العقد بخصوص عقد المشروع او أحدي وثائقه )	7- ضعف تقنيات التخطيط والرقابة ( أي عدم تحقيق الأهداف المرسومة في ظل تحقيق الكفاءة في استخدام الموارد المتاحة )	8- عدم التنسيق بين المصممين والمقاولين ( أي عدم التنسيق بين الأطراف المشاركة لضمان التنفيذ الناجح لجميع المراحل وفقاً للأهداف المخططة )	9- عدم سرعة اتخاذ القرار بمشاركة جميع أطراف المشروع ( أي عدم القدرة علي رؤية الاختيارات المتاحة بوضوح )	10- نقص في تدريب الموارد البشرية على المهارات التي يتطلبها المشروع ( أي قله تدريب و تعزيز مهارات الموظفين لتطوير مهاراتهم وإمكانيتهم )	11- عدم التزام الإدارة بالتحسين المستمر للجودة ( أي قلة العمل علي تطوير العمليات والأنشطة المتعلقة بالالأت و المواد والأفراد وطرق الأنتاج بشكل مستمر )	12- عدم حساب تكلفة الجودة المخططة للمشروع ( أي عدم حساب التكاليف التي تتكبدها الشركة للتأكد من أن منتجاتها أو خدمتها تلبي معايير الجودة المطلوبة )	13- عدم خبرة فريق الإشراف ( أي عدم كفاءة التوجيه والإشراف علي الأعمال )	14- ترددمدير مشروع في اتخاذ القرار المالي ( أي عدم قدرةمدير مشروع في اي تغيير او تعديل علي سبيل المثال تغيير الميزانية المقدرة للمشروع )	15- التردد في اتخاذ القرار في الوقت المناسب من قبلمدير مشروع ( أي المماطلة المزمنة عند إتخاذ القرارات )	16- ضعف الإشراف ومتابعة العمل خلال ساعات العمل الإضافية ( أي ضعف تتبع ساعات نظام العمل الإضافي )	17- عدم مطابقة أهداف الجودة للمعايير والمواصفات ( أي عدم المطابقة لمتطلبات و مواصفات او خصائص معينة قادرة علي الوفاء بالمعايير والمتطلبات المتعارف عليها في المؤسسات المماثلة )	18- ضعف القيادة الفعالة لإدارة المشروع ( أي عدم القدرة علي توجيه وتحفيز الأفراد لتحقيق أهداف محددة )	19- عدم استخدام القوى العاملة الماهرة في التنفيذ ( أي تعيين عمالة بخبرات ضعيفة في أعمال التنفيذ )	20- عدم تخطيط التدفق النقدي ( أي عدم تطبيق نظام لمتابعة حركة الأموال داخل الشركة كل شهر اوخلال فترة معينة )	21- عدم وضوح الهيكل التنظيمي للعاملين بالمشروع ( أي عدم توضيح التنظيم والهيكل الإدراي للمؤسسة وتوزيع المهامات بفاعلية )	22- عدم استخدام أنظمة المشتريات المتكاملة ( أي ضعف ادارة عملية الشراء وعدم تحديد اهم احتياجات المنظمة )	23- ضعف التركيز علي عملية النفقات والمشتريات ( أي عدم متابعة الميزانية والتدفق النقدي )	24- ضعف الإنتاجية ( أي عدم إيجاد نظم وحلول جديدة لاستغلال الموارد المتاحة لتحقيق اعلي جودة في أفضل وقت وبأقل تكاليف ممكنة )	25- ضعف جودة الموارد المستخدمة ( أي عدم مطابقة الموارد للمواصفات و المعايير الفنية )	26- الفجوة بين الجدول الزمني المخطط والفعلي ( أي وجود فرق بين الوقت المخطط والوقت الفعلي المستغرق لإتمام المشروع )	27- الفجوة بين التكلفة المخططة والتكلفة الفعلية ( أي وجود فرق بين التكلفة المخططة والتكلفة الفعلية لإتمام المشروع )	28- الفجوة بين الهدف المخطط والفعلي ( أي وجود اختلاف بين الأداء الفعلي و الأداء المتوقع مستقبليأ للمؤسسة )	1- إهدار الموارد في الموقع ( أي إستخدام الموارد سواء مواد او ومعدات او عمالة بشكل غير جيد )	2- نقص الخبرة والموارد الفنية والمهنية لأداء المهمة ( أي ضعف المهارات لتقييم متطلبات المشروع وتحقيق النتايج المطلوبة )	3- عدم الوعي بالجودة لفريق المشروع ( أي عدم فهم قيمة الجودة والدقة في العمل لتقديم الخدمة بأفضل طريقة )
2	مكه للتطوير العقاري	خاصة	لا	مقاول	1999	مدير المشروع	بكالوريوس	من 5 إلي 10 سنوات	من 10 إلي أقل من 20	من 50 إلي أقل من 100	80 مليون	لا	نعم	5	5	2	2	2	2	2	2	2	2	3	1	1	1	1	1	1	1	1	1	1	1	1	1	1	1	1	1	1	1	1	1	1	3	1	1
													2	X1	X2	X3	X4	X5	X6	X7	X8	X9	X10	X11	X12	X13	X14	X15	X16	X17	X18	X19	X20	X21	X22	X23	X24	X25	X26	X27	X28	X29	X30	X31	X32	X33	X34	X35	X36
														5	5	2	2	2	2	2	2	2	2	3	1	1	1	1	1	1	1	1	1	1	1	1	1	1	1	1	1	1	1	1	1	1	3	1	1
	X1			X2			X3			X4			X5			X6			X7			X8			X9			X10			X11			X12			X13			X14			X15			X16			X17
X1	1	1	1	1	1	1	3	4	5	3	4	5	3	4	5	3	4	5	3	4	5	3	4	5	3	4	5	3	4	5	2	3	4	4	5	6	4	5	6	4	5	6	4	5	6	4	5	6	4
X2	1	1	1	1	1	1	3	4	5	3	4	5	3	4	5	3	4	5	3	4	5	3	4	5	3	4	5	3	4	5	2	3	4	4	5	6	4	5	6	4	5	6	4	5	6	4	5	6	4
X3	0.2	0.25	0.333333	0.2	0.25	0.333333	1	1	1	1	1	1	1	1	1	1	1	1	1	1	1	1	1	1	1	1	1	1	1	1	1	0.5	0.333333	1	2	3	1	2	3	1	2	3	1	2	3	1	2	3	1
X4	0.2	0.25	0.333333	0.2	0.25	0.333333	1	1	1	1	1	1	1	1	1	1	1	1	1	1	1	1	1	1	1	1	1	1	1	1	1	0.5	0.333333	1	2	3	1	2	3	1	2	3	1	2	3	1	2	3	1
X5	0.2	0.25	0.333333	0.2	0.25	0.333333	1	1	1	1	1	1	1	1	1	1	1	1	1	1	1	1	1	1	1	1	1	1	1	1	1	0.5	0.333333	1	2	3	1	2	3	1	2	3	1	2	3	1	2	3	1
X6	0.2	0.25	0.333333	0.2	0.25	0.333333	1	1	1	1	1	1	1	1	1	1	1	1	1	1	1	1	1	1	1	1	1	1	1	1	1	0.5	0.333333	1	2	3	1	2	3	1	2	3	1	2	3	1	2	3	1
X7	0.2	0.25	0.333333	0.2	0.25	0.333333	1	1	1	1	1	1	1	1	1	1	1	1	1	1	1	1	1	1	1	1	1	1	1	1	1	0.5	0.333333	1	2	3	1	2	3	1	2	3	1	2	3	1	2	3	1
X8	0.2	0.25	0.333333	0.2	0.25	0.333333	1	1	1	1	1	1	1	1	1	1	1	1	1	1	1	1	1	1	1	1	1	1	1	1	1	0.5	0.333333	1	2	3	1	2	3	1	2	3	1	2	3	1	2	3	1
X9	0.2	0.25	0.333333	0.2	0.25	0.333333	1	1	1	1	1	1	1	1	1	1	1	1	1	1	1	1	1	1	1	1	1	1	1	1	1	0.5	0.333333	1	2	3	1	2	3	1	2	3	1	2	3	1	2	3	1
X10	0.2	0.25	0.333333	0.2	0.25	0.333333	1	1	1	1	1	1	1	1	1	1	1	1	1	1	1	1	1	1	1	1	1	1	1	1	1	0.5	0.333333	1	2	3	1	2	3	1	2	3	1	2	3	1	2	3	1
X11	0.25	0.333333	0.5	0.25	0.333333	0.5	1	2	3	1	2	3	1	2	3	1	2	3	1	2	3	1	2	3	1	2	3	1	2	3	1	1	1	2	3	4	2	3	4	2	3	4	2	3	4	2	3	4	2
X12	0.166667	0.2	0.25	0.166667	0.2	0.25	0.333333	0.5	1	0.333333	0.5	1	0.333333	0.5	1	0.333333	0.5	1	0.333333	0.5	1	0.333333	0.5	1	0.333333	0.5	1	0.333333	0.5	1	0.25	0.333333	0.5	1	1	1	1	1	1	1	1	1	1	1	1	1	1	1	1
X13	0.166667	0.2	0.25	0.166667	0.2	0.25	0.333333	0.5	1	0.333333	0.5	1	0.333333	0.5	1	0.333333	0.5	1	0.333333	0.5	1	0.333333	0.5	1	0.333333	0.5	1	0.333333	0.5	1	0.25	0.333333	0.5	1	1	1	1	1	1	1	1	1	1	1	1	1	1	1	1
X14	0.166667	0.2	0.25	0.166667	0.2	0.25	0.333333	0.5	1	0.333333	0.5	1	0.333333	0.5	1	0.333333	0.5	1	0.333333	0.5	1	0.333333	0.5	1	0.333333	0.5	1	0.333333	0.5	1	0.25	0.333333	0.5	1	1	1	1	1	1	1	1	1	1	1	1	1	1	1	1
X15	0.166667	0.2	0.25	0.166667	0.2	0.25	0.333333	0.5	1	0.333333	0.5	1	0.333333	0.5	1	0.333333	0.5	1	0.333333	0.5	1	0.333333	0.5	1	0.333333	0.5	1	0.333333	0.5	1	0.25	0.333333	0.5	1	1	1	1	1	1	1	1	1	1	1	1	1	1	1	1
X16	0.166667	0.2	0.25	0.166667	0.2	0.25	0.333333	0.5	1	0.333333	0.5	1	0.333333	0.5	1	0.333333	0.5	1	0.333333	0.5	1	0.333333	0.5	1	0.333333	0.5	1	0.333333	0.5	1	0.25	0.333333	0.5	1	1	1	1	1	1	1	1	1	1	1	1	1	1	1	1
X17	0.166667	0.2	0.25	0.166667	0.2	0.25	0.333333	0.5	1	0.333333	0.5	1	0.333333	0.5	1	0.333333	0.5	1	0.333333	0.5	1	0.333333	0.5	1	0.333333	0.5	1	0.333333	0.5	1	0.25	0.333333	0.5	1	1	1	1	1	1	1	1	1	1	1	1	1	1	1	1
X18	0.166667	0.2	0.25	0.166667	0.2	0.25	0.333333	0.5	1	0.333333	0.5	1	0.333333	0.5	1	0.333333	0.5	1	0.333333	0.5	1	0.333333	0.5	1	0.333333	0.5	1	0.333333	0.5	1	0.25	0.333333	0.5	1	1	1	1	1	1	1	1	1	1	1	1	1	1	1	1
X19	0.166667	0.2	0.25	0.166667	0.2	0.25	0.333333	0.5	1	0.333333	0.5	1	0.333333	0.5	1	0.333333	0.5	1	0.333333	0.5	1	0.333333	0.5	1	0.333333	0.5	1	0.333333	0.5	1	0.25	0.333333	0.5	1	1	1	1	1	1	1	1	1	1	1	1	1	1	1	1
X20	0.166667	0.2	0.25	0.166667	0.2	0.25	0.333333	0.5	1	0.333333	0.5	1	0.333333	0.5	1	0.333333	0.5	1	0.333333	0.5	1	0.333333	0.5	1	0.333333	0.5	1	0.333333	0.5	1	0.25	0.333333	0.5	1	1	1	1	1	1	1	1	1	1	1	1	1	1	1	1
X21	0.166667	0.2	0.25	0.166667	0.2	0.25	0.333333	0.5	1	0.333333	0.5	1	0.333333	0.5	1	0.333333	0.5	1	0.333333	0.5	1	0.333333	0.5	1	0.333333	0.5	1	0.333333	0.5	1	0.25	0.333333	0.5	1	1	1	1	1	1	1	1	1	1	1	1	1	1	1	1
X22	0.166667	0.2	0.25	0.166667	0.2	0.25	0.333333	0.5	1	0.333333	0.5	1	0.333333	0.5	1	0.333333	0.5	1	0.333333	0.5	1	0.333333	0.5	1	0.333333	0.5	1	0.333333	0.5	1	0.25	0.333333	0.5	1	1	1	1	1	1	1	1	1	1	1	1	1	1	1	1
X23	0.166667	0.2	0.25	0.166667	0.2	0.25	0.333333	0.5	1	0.333333	0.5	1	0.333333	0.5	1	0.333333	0.5	1	0.333333	0.5	1	0.333333	0.5	1	0.333333	0.5	1	0.333333	0.5	1	0.25	0.333333	0.5	1	1	1	1	1	1	1	1	1	1	1	1	1	1	1	1
X24	0.166667	0.2	0.25	0.166667	0.2	0.25	0.333333	0.5	1	0.333333	0.5	1	0.333333	0.5	1	0.333333	0.5	1	0.333333	0.5	1	0.333333	0.5	1	0.333333	0.5	1	0.333333	0.5	1	0.25	0.333333	0.5	1	1	1	1	1	1	1	1	1	1	1	1	1	1	1	1
X25	0.166667	0.2	0.25	0.166667	0.2	0.25	0.333333	0.5	1	0.333333	0.5	1	0.333333	0.5	1	0.333333	0.5	1	0.333333	0.5	1	0.333333	0.5	1	0.333333	0.5	1	0.333333	0.5	1	0.25	0.333333	0.5	1	1	1	1	1	1	1	1	1	1	1	1	1	1	1	1
X26	0.166667	0.2	0.25	0.166667	0.2	0.25	0.333333	0.5	1	0.333333	0.5	1	0.333333	0.5	1	0.333333	0.5	1	0.333333	0.5	1	0.333333	0.5	1	0.333333	0.5	1	0.333333	0.5	1	0.25	0.333333	0.5	1	1	1	1	1	1	1	1	1	1	1	1	1	1	1	1
X27	0.166667	0.2	0.25	0.166667	0.2	0.25	0.333333	0.5	1	0.333333	0.5	1	0.333333	0.5	1	0.333333	0.5	1	0.333333	0.5	1	0.333333	0.5	1	0.333333	0.5	1	0.333333	0.5	1	0.25	0.333333	0.5	1	1	1	1	1	1	1	1	1	1	1	1	1	1	1	1
X28	0.166667	0.2	0.25	0.166667	0.2	0.25	0.333333	0.5	1	0.333333	0.5	1	0.333333	0.5	1	0.333333	0.5	1	0.333333	0.5	1	0.333333	0.5	1	0.333333	0.5	1	0.333333	0.5	1	0.25	0.333333	0.5	1	1	1	1	1	1	1	1	1	1	1	1	1	1	1	1
X29	0.166667	0.2	0.25	0.166667	0.2	0.25	0.333333	0.5	1	0.333333	0.5	1	0.333333	0.5	1	0.333333	0.5	1	0.333333	0.5	1	0.333333	0.5	1	0.333333	0.5	1	0.333333	0.5	1	0.25	0.333333	0.5	1	1	1	1	1	1	1	1	1	1	1	1	1	1	1	1
X30	0.166667	0.2	0.25	0.166667	0.2	0.25	0.333333	0.5	1	0.333333	0.5	1	0.333333	0.5	1	0.333333	0.5	1	0.333333	0.5	1	0.333333	0.5	1	0.333333	0.5	1	0.333333	0.5	1	0.25	0.333333	0.5	1	1	1	1	1	1	1	1	1	1	1	1	1	1	1	1
X31	0.166667	0.2	0.25	0.166667	0.2	0.25	0.333333	0.5	1	0.333333	0.5	1	0.333333	0.5	1	0.333333	0.5	1	0.333333	0.5	1	0.333333	0.5	1	0.333333	0.5	1	0.333333	0.5	1	0.25	0.333333	0.5	1	1	1	1	1	1	1	1	1	1	1	1	1	1	1	1
X32	0.166667	0.2	0.25	0.166667	0.2	0.25	0.333333	0.5	1	0.333333	0.5	1	0.333333	0.5	1	0.333333	0.5	1	0.333333	0.5	1	0.333333	0.5	1	0.333333	0.5	1	0.333333	0.5	1	0.25	0.333333	0.5	1	1	1	1	1	1	1	1	1	1	1	1	1	1	1	1
X33	0.166667	0.2	0.25	0.166667	0.2	0.25	0.333333	0.5	1	0.333333	0.5	1	0.333333	0.5	1	0.333333	0.5	1	0.333333	0.5	1	0.333333	0.5	1	0.333333	0.5	1	0.333333	0.5	1	0.25	0.333333	0.5	1	1	1	1	1	1	1	1	1	1	1	1	1	1	1	1
X34	0.25	0.333333	0.5	0.25	0.333333	0.5	1	2	3	1	2	3	1	2	3	1	2	3	1	2	3	1	2	3	1	2	3	1	2	3	1	1	1	2	3	4	2	3	4	2	3	4	2	3	4	2	3	4	2
X35	0.166667	0.2	0.25	0.166667	0.2	0.25	0.333333	0.5	1	0.333333	0.5	1	0.333333	0.5	1	0.333333	0.5	1	0.333333	0.5	1	0.333333	0.5	1	0.333333	0.5	1	0.333333	0.5	1	0.25	0.333333	0.5	1	1	1	1	1	1	1	1	1	1	1	1	1	1	1	1
X36	0.166667	0.2	0.25	0.166667	0.2	0.25	0.333333	0.5	1	0.333333	0.5	1	0.333333	0.5	1	0.333333	0.5	1	0.333333	0.5	1	0.333333	0.5	1	0.333333	0.5	1	0.333333	0.5	1	0.25	0.333333	0.5	1	1	1	1	1	1	1	1	1	1	1	1	1	1	1	1
X37	0.166667	0.2	0.25	0.166667	0.2	0.25	0.333333	0.5	1	0.333333	0.5	1	0.333333	0.5	1	0.333333	0.5	1	0.333333	0.5	1	0.333333	0.5	1	0.333333	0.5	1	0.333333	0.5	1	0.25	0.333333	0.5	1	1	1	1	1	1	1	1	1	1	1	1	1	1	1	1
X38	0.166667	0.2	0.25	0.166667	0.2	0.25	0.333333	0.5	1	0.333333	0.5	1	0.333333	0.5	1	0.333333	0.5	1	0.333333	0.5	1	0.333333	0.5	1	0.333333	0.5	1	0.333333	0.5	1	0.25	0.333333	0.5	1	1	1	1	1	1	1	1	1	1	1	1	1	1	1	1
X39	0.166667	0.2	0.25	0.166667	0.2	0.25	0.333333	0.5	1	0.333333	0.5	1	0.333333	0.5	1	0.333333	0.5	1	0.333333	0.5	1	0.333333	0.5	1	0.333333	0.5	1	0.333333	0.5	1	0.25	0.333333	0.5	1	1	1	1	1	1	1	1	1	1	1	1	1	1	1	1
X40	0.166667	0.2	0.25	0.166667	0.2	0.25	0.333333	0.5	1	0.333333	0.5	1	0.333333	0.5	1	0.333333	0.5	1	0.333333	0.5	1	0.333333	0.5	1	0.333333	0.5	1	0.333333	0.5	1	0.25	0.333333	0.5	1	1	1	1	1	1	1	1	1	1	1	1	1	1	1	1
X41	0.166667	0.2	0.25	0.166667	0.2	0.25	0.333333	0.5	1	0.333333	0.5	1	0.333333	0.5	1	0.333333	0.5	1	0.333333	0.5	1	0.333333	0.5	1	0.333333	0.5	1	0.333333	0.5	1	0.25	0.333333	0.5	1	1	1	1	1	1	1	1	1	1	1	1	1	1	1	1
X42	0.166667	0.2	0.25	0.166667	0.2	0.25	0.333333	0.5	1	0.333333	0.5	1	0.333333	0.5	1	0.333333	0.5	1	0.333333	0.5	1	0.333333	0.5	1	0.333333	0.5	1	0.333333	0.5	1	0.25	0.333333	0.5	1	1	1	1	1	1	1	1	1	1	1	1	1	1	1	1
X43	0.166667	0.2	0.25	0.166667	0.2	0.25	0.333333	0.5	1	0.333333	0.5	1	0.333333	0.5	1	0.333333	0.5	1	0.333333	0.5	1	0.333333	0.5	1	0.333333	0.5	1	0.333333	0.5	1	0.25	0.333333	0.5	1	1	1	1	1	1	1	1	1	1	1	1	1	1	1	1
X44	0.166667	0.2	0.25	0.166667	0.2	0.25	0.333333	0.5	1	0.333333	0.5	1	0.333333	0.5	1	0.333333	0.5	1	0.333333	0.5	1	0.333333	0.5	1	0.333333	0.5	1	0.333333	0.5	1	0.25	0.333333	0.5	1	1	1	1	1	1	1	1	1	1	1	1	1	1	1	1
X45	0.2	0.25	0.333333	0.2	0.25	0.333333	1	1	1	1	1	1	1	1	1	1	1	1	1	1	1	1	1	1	1	1	1	1	1	1	0.333333	0.5	1	1	2	3	1	2	3	1	2	3	1	2	3	1	2	3	1
X46	0.2	0.25	0.333333	0.2	0.25	0.333333	1	1	1	1	1	1	1	1	1	1	1	1	1	1	1	1	1	1	1	1	1	1	1	1	0.333333	0.5	1	1	2	3	1	2	3	1	2	3	1	2	3	1	2	3	1
X47	0.166667	0.2	0.25	0.166667	0.2	0.25	0.333333	0.5	1	0.333333	0.5	1	0.333333	0.5	1	0.333333	0.5	1	0.333333	0.5	1	0.333333	0.5	1	0.333333	0.5	1	0.333333	0.5	1	0.25	0.333333	0.5	1	1	1	1	1	1	1	1	1	1	1	1	1	1	1	1
X48	0.166667	0.2	0.25	0.166667	0.2	0.25	0.333333	0.5	1	0.333333	0.5	1	0.333333	0.5	1	0.333333	0.5	1	0.333333	0.5	1	0.333333	0.5	1	0.333333	0.5	1	0.333333	0.5	1	0.25	0.333333	0.5	1	1	1	1	1	1	1	1	1	1	1	1	1	1	1	1
X49	0.166667	0.2	0.25	0.166667	0.2	0.25	0.333333	0.5	1	0.333333	0.5	1	0.333333	0.5	1	0.333333	0.5	1	0.333333	0.5	1	0.333333	0.5	1	0.333333	0.5	1	0.333333	0.5	1	0.25	0.333333	0.5	1	1	1	1	1	1	1	1	1	1	1	1	1	1	1	1
X50	0.166667	0.2	0.25	0.166667	0.2	0.25	0.333333	0.5	1	0.333333	0.5	1	0.333333	0.5	1	0.333333	0.5	1	0.333333	0.5	1	0.333333	0.5	1	0.333333	0.5	1	0.333333	0.5	1	0.25	0.333333	0.5	1	1	1	1	1	1	1	1	1	1	1	1	1	1	1	1
X51	0.166667	0.2	0.25	0.166667	0.2	0.25	0.333333	0.5	1	0.333333	0.5	1	0.333333	0.5	1	0.333333	0.5	1	0.333333	0.5	1	0.333333	0.5	1	0.333333	0.5	1	0.333333	0.5	1	0.25	0.333333	0.5	1	1	1	1	1	1	1	1	1	1	1	1	1	1	1	1
X52	0.166667	0.2	0.25	0.166667	0.2	0.25	0.333333	0.5	1	0.333333	0.5	1	0.333333	0.5	1	0.333333	0.5	1	0.333333	0.5	1	0.333333	0.5	1	0.333333	0.5	1	0.333333	0.5	1	0.25	0.333333	0.5	1	1	1	1	1	1	1	1	1	1	1	1	1	1	1	1
		Geometric Mean					Fuzzy Weights			Average	Normalization
	X1	3.49381	4.41486	5.32381		X1	0.0488245	0.0748802	0.111168	0.0782908	0.0742451
	X2	3.49381	4.41486	5.32381		X2	0.0488245	0.0748802	0.111168	0.0782908	0.0742451
	X3	0.939976	1.53197	2.05099		X3	0.0131358	0.0259836	0.0428272	0.0273155	0.025904
	X4	0.939976	1.53197	2.05099		X4	0.0131358	0.0259836	0.0428272	0.0273155	0.025904
	X5	0.939976	1.53197	2.05099		X5	0.0131358	0.0259836	0.0428272	0.0273155	0.025904
	X6	0.939976	1.53197	2.05099		X6	0.0131358	0.0259836	0.0428272	0.0273155	0.025904
	X7	0.939976	1.53197	2.05099		X7	0.0131358	0.0259836	0.0428272	0.0273155	0.025904
	X8	0.939976	1.53197	2.05099		X8	0.0131358	0.0259836	0.0428272	0.0273155	0.025904
	X9	0.939976	1.53197	2.05099		X9	0.0131358	0.0259836	0.0428272	0.0273155	0.025904
	X10	0.939976	1.53197	2.05099		X10	0.0131358	0.0259836	0.0428272	0.0273155	0.025904
	X11	1.57336	2.44458	3.3124		X11	0.021987	0.0414624	0.069167	0.0442055	0.0419212
	X12	0.757357	0.788634	0.873225		X12	0.0105837	0.013376	0.018234	0.0140646	0.0133378
	X13	0.757357	0.788634	0.873225		X13	0.0105837	0.013376	0.018234	0.0140646	0.0133378
	X14	0.757357	0.788634	0.873225		X14	0.0105837	0.013376	0.018234	0.0140646	0.0133378
	X15	0.757357	0.788634	0.873225		X15	0.0105837	0.013376	0.018234	0.0140646	0.0133378
	X16	0.757357	0.788634	0.873225		X16	0.0105837	0.013376	0.018234	0.0140646	0.0133378
	X17	0.757357	0.788634	0.873225		X17	0.0105837	0.013376	0.018234	0.0140646	0.0133378
	X18	0.757357	0.788634	0.873225		X18	0.0105837	0.013376	0.018234	0.0140646	0.0133378
	X19	0.757357	0.788634	0.873225		X19	0.0105837	0.013376	0.018234	0.0140646	0.0133378
	X20	0.757357	0.788634	0.873225		X20	0.0105837	0.013376	0.018234	0.0140646	0.0133378
	X21	0.757357	0.788634	0.873225		X21	0.0105837	0.013376	0.018234	0.0140646	0.0133378
	X22	0.757357	0.788634	0.873225		X22	0.0105837	0.013376	0.018234	0.0140646	0.0133378
	X23	0.757357	0.788634	0.873225		X23	0.0105837	0.013376	0.018234	0.0140646	0.0133378
	X24	0.757357	0.788634	0.873225		X24	0.0105837	0.013376	0.018234	0.0140646	0.0133378
	X25	0.757357	0.788634	0.873225		X25	0.0105837	0.013376	0.018234	0.0140646	0.0133378
	X26	0.757357	0.788634	0.873225		X26	0.0105837	0.013376	0.018234	0.0140646	0.0133378
	X27	0.757357	0.788634	0.873225		X27	0.0105837	0.013376	0.018234	0.0140646	0.0133378
	X28	0.757357	0.788634	0.873225		X28	0.0105837	0.013376	0.018234	0.0140646	0.0133378
	X29	0.757357	0.788634	0.873225		X29	0.0105837	0.013376	0.018234	0.0140646	0.0133378
	X30	0.757357	0.788634	0.873225		X30	0.0105837	0.013376	0.018234	0.0140646	0.0133378
	X31	0.757357	0.788634	0.873225		X31	0.0105837	0.013376	0.018234	0.0140646	0.0133378			تقيمم fuzzy ahp		تقييم الاستبيان
	X32	0.757357	0.788634	0.873225		X32	0.0105837	0.013376	0.018234	0.0140646	0.0133378			1		1
	X33	0.757357	0.805473	0.873225		X33	0.0105837	0.0136616	0.018234	0.0141598	0.0134281			3		2
	X34	1.57336	2.39348	3.3124		X34	0.021987	0.0405957	0.069167	0.0439165	0.0416472			5		3
	X35	0.747329	0.788634	0.884942		X35	0.0104436	0.013376	0.0184787	0.0140994	0.0133708			7		4
	X36	0.747329	0.788634	0.884942		X36	0.0104436	0.013376	0.0184787	0.0140994	0.0133708			9		5
	X37	0.747329	0.788634	0.884942		X37	0.0104436	0.013376	0.0184787	0.0140994	0.0133708
	X38	0.747329	0.788634	0.884942		X38	0.0104436	0.013376	0.0184787	0.0140994	0.0133708
	X39	0.747329	0.788634	0.884942		X39	0.0104436	0.013376	0.0184787	0.0140994	0.0133708
	X40	0.747329	0.788634	0.884942		X40	0.0104436	0.013376	0.0184787	0.0140994	0.0133708
	X41	0.747329	0.788634	0.884942		X41	0.0104436	0.013376	0.0184787	0.0140994	0.0133708
	X42	0.747329	0.788634	0.884942		X42	0.0104436	0.013376	0.0184787	0.0140994	0.0133708
	X43	0.747329	0.788634	0.884942		X43	0.0104436	0.013376	0.0184787	0.0140994	0.0133708
	X44	0.747329	0.799216	0.884942		X44	0.0104436	0.0135555	0.0184787	0.0141592	0.0134276
	X45	0.901085	1.53197	2.13951		X45	0.0125923	0.0259836	0.0446756	0.0277505	0.0263165
	X46	0.901085	1.51168	2.13951		X46	0.0125923	0.0256395	0.0446756	0.0276358	0.0262077
	X47	0.716409	0.788634	0.923136		X47	0.0100115	0.013376	0.0192762	0.0142212	0.0134864
	X48	0.716409	0.788634	0.923136		X48	0.0100115	0.013376	0.0192762	0.0142212	0.0134864
	X49	0.716409	0.788634	0.923136		X49	0.0100115	0.013376	0.0192762	0.0142212	0.0134864
	X50	0.716409	0.788634	0.923136		X50	0.0100115	0.013376	0.0192762	0.0142212	0.0134864
	X51	0.716409	0.788634	0.923136		X51	0.0100115	0.013376	0.0192762	0.0142212	0.0134864
	X52	0.716409	0.78497	0.923136		X52	0.0100115	0.0133138	0.0192762	0.0142005	0.0134667
	Sum	47.8899	58.959	71.5586		Total Average				1.05449	1
	Inverse	0.0208812	0.0169609	0.0139746
	Arrange	0.0139746	0.0169609	0.0208812
[truncated: 107 more columns]

## Sheet: N (3)
	اسم الشركة	نوع الشركة	هل معتمدة ب ISO9000	تخصص الشركة	سنة التأسيس	المنصب	الدرجة العلمية الحاصل عليها	سنوات الخبرة في مجال العمل	عدد المشاريع المنفذة خلال الخمس سنوات الماضية	قيمة المشاريع المنفذة خلال الخمس سنوات الماضية (مليون جنيه مصرى)	قيمة المشروع الحالي	هل تطبق الشركة التي تعمل بها مفاهيم إدارة المشاريع ولديها نظام إدارة الجودة (QMS)	هل لديك أي علاقة بأنشطة إدارة الجودة ؟	1- طريقة تسليم المشروع أي الأجراء المحدد لإنهاء الخدمة التي يختارها العميل مثل ((Design-bid-build(DBB)/Design-build (DB)/Construction Manager at risk(CMAR)/Job order contracting /Fast track)	2- نوع العقد أي طريقة التعاقد بين الجهات المعنيه مثل (Unit price/ Lumpsum/ Cost plus fixed fee / Cost plus percentage fee/ Target cost / Other contract)	3- فئة المقاول أي درجة تصنيف المقاول طبقا لنظام تصنيف المقاولين مثل (درجة أولي - درجة ثانية - أخرى )	4- مدة المشروع أي التأخير عن الجدول الزمني المخطط لتسليم المشروع	5- موقع المشروع أي تأثير الاختيار الامثل لمكان المشروع	1- عدم متابعة العمل من قبل المشاركين في المشروع ( أي عدم قيام أطرف المشروع بمتابعه الاعمال بشكل دوري وعمل تقارير حول ما تم إنجازه )	2- عدم كفايه مواد البناء والمعدات وقطع الغيار ( أي النقص في الموارد المطلوبة وأعمال الصيانة )	3- عدم خبرة مديرين المشاريع، وفريق الإشراف في تحديد الاحتياجات ومتطلبات العمل ( أي عدم القدرة علي تحقيق التوازن بين مختلف المصالح والاحتياجات لأفراد فريق المشروع وأصحاب المصلحة )	4- عدم معرفةمدير مشروع بالتقنيات المناسبة ( أي هل تؤثر عدم معرفةمدير مشروع بالمهارات الفنية والتقنية علي تكلفة الجودة الرديئة ام معرفته بالمهارات الإدارية فقط )	5- المشاكل المتعلقة بالبيئه المحيطه للمشروع ( أي المشاكل المتعلقة بنظام البيئة مثل الهواء والماء والتربة وما إلي ذلك التي نشأت نتيجة للتدخل البشري أو سوء معاملة الأرض )	6- الخلافات والنزاعات بين المشاركين في المشروع ( أي الخلاف بين طرفي العقد بخصوص عقد المشروع او أحدي وثائقه )	7- ضعف تقنيات التخطيط والرقابة ( أي عدم تحقيق الأهداف المرسومة في ظل تحقيق الكفاءة في استخدام الموارد المتاحة )	8- عدم التنسيق بين المصممين والمقاولين ( أي عدم التنسيق بين الأطراف المشاركة لضمان التنفيذ الناجح لجميع المراحل وفقاً للأهداف المخططة )	9- عدم سرعة اتخاذ القرار بمشاركة جميع أطراف المشروع ( أي عدم القدرة علي رؤية الاختيارات المتاحة بوضوح )	10- نقص في تدريب الموارد البشرية على المهارات التي يتطلبها المشروع ( أي قله تدريب و تعزيز مهارات الموظفين لتطوير مهاراتهم وإمكانيتهم )	11- عدم التزام الإدارة بالتحسين المستمر للجودة ( أي قلة العمل علي تطوير العمليات والأنشطة المتعلقة بالالأت و المواد والأفراد وطرق الأنتاج بشكل مستمر )	12- عدم حساب تكلفة الجودة المخططة للمشروع ( أي عدم حساب التكاليف التي تتكبدها الشركة للتأكد من أن منتجاتها أو خدمتها تلبي معايير الجودة المطلوبة )	13- عدم خبرة فريق الإشراف ( أي عدم كفاءة التوجيه والإشراف علي الأعمال )	14- ترددمدير مشروع في اتخاذ القرار المالي ( أي عدم قدرةمدير مشروع في اي تغيير او تعديل علي سبيل المثال تغيير الميزانية المقدرة للمشروع )	15- التردد في اتخاذ القرار في الوقت المناسب من قبلمدير مشروع ( أي المماطلة المزمنة عند إتخاذ القرارات )	16- ضعف الإشراف ومتابعة العمل خلال ساعات العمل الإضافية ( أي ضعف تتبع ساعات نظام العمل الإضافي )	17- عدم مطابقة أهداف الجودة للمعايير والمواصفات ( أي عدم المطابقة لمتطلبات و مواصفات او خصائص معينة قادرة علي الوفاء بالمعايير والمتطلبات المتعارف عليها في المؤسسات المماثلة )	18- ضعف القيادة الفعالة لإدارة المشروع ( أي عدم القدرة علي توجيه وتحفيز الأفراد لتحقيق أهداف محددة )	19- عدم استخدام القوى العاملة الماهرة في التنفيذ ( أي تعيين عمالة بخبرات ضعيفة في أعمال التنفيذ )	20- عدم تخطيط التدفق النقدي ( أي عدم تطبيق نظام لمتابعة حركة الأموال داخل الشركة كل شهر اوخلال فترة معينة )	21- عدم وضوح الهيكل التنظيمي للعاملين بالمشروع ( أي عدم توضيح التنظيم والهيكل الإدراي للمؤسسة وتوزيع المهامات بفاعلية )	22- عدم استخدام أنظمة المشتريات المتكاملة ( أي ضعف ادارة عملية الشراء وعدم تحديد اهم احتياجات المنظمة )	23- ضعف التركيز علي عملية النفقات والمشتريات ( أي عدم متابعة الميزانية والتدفق النقدي )	24- ضعف الإنتاجية ( أي عدم إيجاد نظم وحلول جديدة لاستغلال الموارد المتاحة لتحقيق اعلي جودة في أفضل وقت وبأقل تكاليف ممكنة )	25- ضعف جودة الموارد المستخدمة ( أي عدم مطابقة الموارد للمواصفات و المعايير الفنية )	26- الفجوة بين الجدول الزمني المخطط والفعلي ( أي وجود فرق بين الوقت المخطط والوقت الفعلي المستغرق لإتمام المشروع )	27- الفجوة بين التكلفة المخططة والتكلفة الفعلية ( أي وجود فرق بين التكلفة المخططة والتكلفة الفعلية لإتمام المشروع )	28- الفجوة بين الهدف المخطط والفعلي ( أي وجود اختلاف بين الأداء الفعلي و الأداء المتوقع مستقبليأ للمؤسسة )	1- إهدار الموارد في الموقع ( أي إستخدام الموارد سواء مواد او ومعدات او عمالة بشكل غير جيد )	2- نقص الخبرة والموارد الفنية والمهنية لأداء المهمة ( أي ضعف المهارات لتقييم متطلبات المشروع وتحقيق النتايج المطلوبة )	3- عدم الوعي بالجودة لفريق المشروع ( أي عدم فهم قيمة الجودة والدقة في العمل لتقديم الخدمة بأفضل طريقة )
3	Samco national Egypt	خاصة	نعم	مقاول	2000	مهندس مكتب	بكالوريوس	من 3 إلي أقل من 5 سنوات	من 5 إلي أقل من 10	أكثر من 500	789000000	نعم	نعم	4	4	4	2	4	1	2	1	2	3	2	3	3	2	2	2	2	2	3	2	2	2	2	2	2	2	2	2	2	2	2	2	2	1	1	1
													3	X1	X2	X3	X4	X5	X6	X7	X8	X9	X10	X11	X12	X13	X14	X15	X16	X17	X18	X19	X20	X21	X22	X23	X24	X25	X26	X27	X28	X29	X30	X31	X32	X33	X34	X35	X36
														4	4	4	2	4	1	2	1	2	3	2	3	3	2	2	2	2	2	3	2	2	2	2	2	2	2	2	2	2	2	2	2	2	1	1	1
	X1			X2			X3			X4			X5			X6			X7			X8			X9			X10			X11			X12			X13			X14			X15			X16			X17
X1	1	1	1	1	1	1	1	1	1	2	3	4	1	1	1	3	4	5	2	3	4	3	4	5	2	3	4	1	2	3	2	3	4	1	2	3	1	2	3	2	3	4	2	3	4	2	3	4	2
X2	1	1	1	1	1	1	1	1	1	2	3	4	1	1	1	3	4	5	2	3	4	3	4	5	2	3	4	1	2	3	2	3	4	1	2	3	1	2	3	2	3	4	2	3	4	2	3	4	2
X3	1	1	1	1	1	1	1	1	1	2	3	4	1	1	1	3	4	5	2	3	4	3	4	5	2	3	4	1	2	3	2	3	4	1	2	3	1	2	3	2	3	4	2	3	4	2	3	4	2
X4	0.25	0.333333	0.5	0.25	0.333333	0.5	0.25	0.333333	0.5	1	1	1	0.5	0.333333	0.25	1	2	3	1	1	1	1	2	3	1	1	1	1	0.5	0.333333	1	1	1	1	0.5	0.333333	1	0.5	0.333333	1	1	1	1	1	1	1	1	1	1
X5	1	1	1	1	1	1	1	1	1	2	3	4	1	1	1	3	4	5	2	3	4	3	4	5	2	3	4	1	2	3	2	3	4	1	2	3	1	2	3	2	3	4	2	3	4	2	3	4	2
X6	0.2	0.25	0.333333	0.2	0.25	0.333333	0.2	0.25	0.333333	0.333333	0.5	1	0.2	0.25	0.333333	1	1	1	1	0.5	0.333333	1	1	1	1	0.5	0.333333	0.5	0.333333	0.25	1	0.5	0.333333	0.5	0.333333	0.25	0.5	0.333333	0.25	1	0.5	0.333333	1	0.5	0.333333	1	0.5	0.333333	1
X7	0.25	0.333333	0.5	0.25	0.333333	0.5	0.25	0.333333	0.5	1	1	1	0.25	0.333333	0.5	1	2	3	1	1	1	1	2	3	1	1	1	1	0.5	0.333333	1	1	1	1	0.5	0.333333	1	0.5	0.333333	1	1	1	1	1	1	1	1	1	1
X8	0.2	0.25	0.333333	0.2	0.25	0.333333	0.2	0.25	0.333333	0.333333	0.5	1	0.2	0.25	0.333333	1	1	1	0.333333	0.5	1	1	1	1	1	0.5	0.333333	0.5	0.333333	0.25	1	0.5	0.333333	0.5	0.333333	0.25	0.5	0.333333	0.25	1	0.5	0.333333	1	0.5	0.333333	1	0.5	0.333333	1
X9	0.25	0.333333	0.5	0.25	0.333333	0.5	0.25	0.333333	0.5	1	1	1	0.25	0.333333	0.5	1	2	3	1	1	1	1	2	3	1	1	1	1	0.5	0.333333	1	1	1	1	0.5	0.333333	1	0.5	0.333333	1	1	1	1	1	1	1	1	1	1
X10	0.333333	0.5	1	0.333333	0.5	1	0.333333	0.5	1	1	2	3	0.333333	0.5	1	2	3	4	1	2	3	2	3	4	1	2	3	1	1	1	1	2	3	1	1	1	1	1	1	1	2	3	1	2	3	1	2	3	1
X11	0.25	0.333333	0.5	0.25	0.333333	0.5	0.25	0.333333	0.5	1	1	1	0.25	0.333333	0.5	1	2	3	1	1	1	1	2	3	1	1	1	0.333333	0.5	1	1	1	1	1	0.5	0.333333	1	0.5	0.333333	1	1	1	1	1	1	1	1	1	1
X12	0.333333	0.5	1	0.333333	0.5	1	0.333333	0.5	1	1	2	3	0.333333	0.5	1	2	3	4	1	2	3	2	3	4	1	2	3	1	1	1	1	2	3	1	1	1	1	1	1	1	2	3	1	2	3	1	2	3	1
X13	0.333333	0.5	1	0.333333	0.5	1	0.333333	0.5	1	1	2	3	0.333333	0.5	1	2	3	4	1	2	3	2	3	4	1	2	3	1	1	1	1	2	3	1	1	1	1	1	1	1	2	3	1	2	3	1	2	3	1
X14	0.25	0.333333	0.5	0.25	0.333333	0.5	0.25	0.333333	0.5	1	1	1	0.25	0.333333	0.5	1	2	3	1	1	1	1	2	3	1	1	1	0.333333	0.5	1	1	1	1	0.333333	0.5	1	0.333333	0.5	1	1	1	1	1	1	1	1	1	1	1
X15	0.25	0.333333	0.5	0.25	0.333333	0.5	0.25	0.333333	0.5	1	1	1	0.25	0.333333	0.5	1	2	3	1	1	1	1	2	3	1	1	1	0.333333	0.5	1	1	1	1	0.333333	0.5	1	0.333333	0.5	1	1	1	1	1	1	1	1	1	1	1
X16	0.25	0.333333	0.5	0.25	0.333333	0.5	0.25	0.333333	0.5	1	1	1	0.25	0.333333	0.5	1	2	3	1	1	1	1	2	3	1	1	1	0.333333	0.5	1	1	1	1	0.333333	0.5	1	0.333333	0.5	1	1	1	1	1	1	1	1	1	1	1
X17	0.25	0.333333	0.5	0.25	0.333333	0.5	0.25	0.333333	0.5	1	1	1	0.25	0.333333	0.5	1	2	3	1	1	1	1	2	3	1	1	1	0.333333	0.5	1	1	1	1	0.333333	0.5	1	0.333333	0.5	1	1	1	1	1	1	1	1	1	1	1
X18	0.25	0.333333	0.5	0.25	0.333333	0.5	0.25	0.333333	0.5	1	1	1	0.25	0.333333	0.5	1	2	3	1	1	1	1	2	3	1	1	1	0.333333	0.5	1	1	1	1	0.333333	0.5	1	0.333333	0.5	1	1	1	1	1	1	1	1	1	1	1
X19	0.333333	0.5	1	0.333333	0.5	1	0.333333	0.5	1	1	2	3	0.333333	0.5	1	2	3	4	1	2	3	2	3	4	1	2	3	1	1	1	1	2	3	1	1	1	1	1	1	1	2	3	1	2	3	1	2	3	1
X20	0.25	0.333333	0.5	0.25	0.333333	0.5	0.25	0.333333	0.5	1	1	1	0.25	0.333333	0.5	1	2	3	1	1	1	1	2	3	1	1	1	0.333333	0.5	1	1	1	1	0.333333	0.5	1	0.333333	0.5	1	1	1	1	1	1	1	1	1	1	1
X21	0.25	0.333333	0.5	0.25	0.333333	0.5	0.25	0.333333	0.5	1	1	1	0.25	0.333333	0.5	1	2	3	1	1	1	1	2	3	1	1	1	0.333333	0.5	1	1	1	1	0.333333	0.5	1	0.333333	0.5	1	1	1	1	1	1	1	1	1	1	1
X22	0.25	0.333333	0.5	0.25	0.333333	0.5	0.25	0.333333	0.5	1	1	1	0.25	0.333333	0.5	1	2	3	1	1	1	1	2	3	1	1	1	0.333333	0.5	1	1	1	1	0.333333	0.5	1	0.333333	0.5	1	1	1	1	1	1	1	1	1	1	1
X23	0.25	0.333333	0.5	0.25	0.333333	0.5	0.25	0.333333	0.5	1	1	1	0.25	0.333333	0.5	1	2	3	1	1	1	1	2	3	1	1	1	0.333333	0.5	1	1	1	1	0.333333	0.5	1	0.333333	0.5	1	1	1	1	1	1	1	1	1	1	1
X24	0.25	0.333333	0.5	0.25	0.333333	0.5	0.25	0.333333	0.5	1	1	1	0.25	0.333333	0.5	1	2	3	1	1	1	1	2	3	1	1	1	0.333333	0.5	1	1	1	1	0.333333	0.5	1	0.333333	0.5	1	1	1	1	1	1	1	1	1	1	1
X25	0.25	0.333333	0.5	0.25	0.333333	0.5	0.25	0.333333	0.5	1	1	1	0.25	0.333333	0.5	1	2	3	1	1	1	1	2	3	1	1	1	0.333333	0.5	1	1	1	1	0.333333	0.5	1	0.333333	0.5	1	1	1	1	1	1	1	1	1	1	1
X26	0.25	0.333333	0.5	0.25	0.333333	0.5	0.25	0.333333	0.5	1	1	1	0.25	0.333333	0.5	1	2	3	1	1	1	1	2	3	1	1	1	0.333333	0.5	1	1	1	1	0.333333	0.5	1	0.333333	0.5	1	1	1	1	1	1	1	1	1	1	1
X27	0.25	0.333333	0.5	0.25	0.333333	0.5	0.25	0.333333	0.5	1	1	1	0.25	0.333333	0.5	1	2	3	1	1	1	1	2	3	1	1	1	0.333333	0.5	1	1	1	1	0.333333	0.5	1	0.333333	0.5	1	1	1	1	1	1	1	1	1	1	1
X28	0.25	0.333333	0.5	0.25	0.333333	0.5	0.25	0.333333	0.5	1	1	1	0.25	0.333333	0.5	1	2	3	1	1	1	1	2	3	1	1	1	0.333333	0.5	1	1	1	1	0.333333	0.5	1	0.333333	0.5	1	1	1	1	1	1	1	1	1	1	1
X29	0.25	0.333333	0.5	0.25	0.333333	0.5	0.25	0.333333	0.5	1	1	1	0.25	0.333333	0.5	1	2	3	1	1	1	1	2	3	1	1	1	0.333333	0.5	1	1	1	1	0.333333	0.5	1	0.333333	0.5	1	1	1	1	1	1	1	1	1	1	1
X30	0.25	0.333333	0.5	0.25	0.333333	0.5	0.25	0.333333	0.5	1	1	1	0.25	0.333333	0.5	1	2	3	1	1	1	1	2	3	1	1	1	0.333333	0.5	1	1	1	1	0.333333	0.5	1	0.333333	0.5	1	1	1	1	1	1	1	1	1	1	1
X31	0.25	0.333333	0.5	0.25	0.333333	0.5	0.25	0.333333	0.5	1	1	1	0.25	0.333333	0.5	1	2	3	1	1	1	1	2	3	1	1	1	0.333333	0.5	1	1	1	1	0.333333	0.5	1	0.333333	0.5	1	1	1	1	1	1	1	1	1	1	1
X32	0.25	0.333333	0.5	0.25	0.333333	0.5	0.25	0.333333	0.5	1	1	1	0.25	0.333333	0.5	1	2	3	1	1	1	1	2	3	1	1	1	0.333333	0.5	1	1	1	1	0.333333	0.5	1	0.333333	0.5	1	1	1	1	1	1	1	1	1	1	1
X33	0.25	0.333333	0.5	0.25	0.333333	0.5	0.25	0.333333	0.5	1	1	1	0.25	0.333333	0.5	1	2	3	1	1	1	1	2	3	1	1	1	0.333333	0.5	1	1	1	1	0.333333	0.5	1	0.333333	0.5	1	1	1	1	1	1	1	1	1	1	1
X34	0.2	0.25	0.333333	0.2	0.25	0.333333	0.2	0.25	0.333333	0.333333	0.5	1	0.2	0.25	0.333333	1	1	1	0.333333	0.5	1	1	1	1	0.333333	0.5	1	0.25	0.333333	0.5	0.333333	0.5	1	0.25	0.333333	0.5	0.25	0.333333	0.5	0.333333	0.5	1	0.333333	0.5	1	0.333333	0.5	1	0.333333
X35	0.2	0.25	0.333333	0.2	0.25	0.333333	0.2	0.25	0.333333	0.333333	0.5	1	0.2	0.25	0.333333	1	1	1	0.333333	0.5	1	1	1	1	0.333333	0.5	1	0.25	0.333333	0.5	0.333333	0.5	1	0.25	0.333333	0.5	0.25	0.333333	0.5	0.333333	0.5	1	0.333333	0.5	1	0.333333	0.5	1	0.333333
X36	0.2	0.25	0.333333	0.2	0.25	0.333333	0.2	0.25	0.333333	0.333333	0.5	1	0.2	0.25	0.333333	1	1	1	0.333333	0.5	1	1	1	1	0.333333	0.5	1	0.25	0.333333	0.5	0.333333	0.5	1	0.25	0.333333	0.5	0.25	0.333333	0.5	0.333333	0.5	1	0.333333	0.5	1	0.333333	0.5	1	0.333333
X37	0.2	0.25	0.333333	0.2	0.25	0.333333	0.2	0.25	0.333333	0.333333	0.5	1	0.2	0.25	0.333333	1	1	1	0.333333	0.5	1	1	1	1	0.333333	0.5	1	0.25	0.333333	0.5	0.333333	0.5	1	0.25	0.333333	0.5	0.25	0.333333	0.5	0.333333	0.5	1	0.333333	0.5	1	0.333333	0.5	1	0.333333
X38	0.2	0.25	0.333333	0.2	0.25	0.333333	0.2	0.25	0.333333	0.333333	0.5	1	0.2	0.25	0.333333	1	1	1	0.333333	0.5	1	1	1	1	0.333333	0.5	1	0.25	0.333333	0.5	0.333333	0.5	1	0.25	0.333333	0.5	0.25	0.333333	0.5	0.333333	0.5	1	0.333333	0.5	1	0.333333	0.5	1	0.333333
X39	0.2	0.25	0.333333	0.2	0.25	0.333333	0.2	0.25	0.333333	0.333333	0.5	1	0.2	0.25	0.333333	1	1	1	0.333333	0.5	1	1	1	1	0.333333	0.5	1	0.25	0.333333	0.5	0.333333	0.5	1	0.25	0.333333	0.5	0.25	0.333333	0.5	0.333333	0.5	1	0.333333	0.5	1	0.333333	0.5	1	0.333333
X40	0.2	0.25	0.333333	0.2	0.25	0.333333	0.2	0.25	0.333333	0.333333	0.5	1	0.2	0.25	0.333333	1	1	1	0.333333	0.5	1	1	1	1	0.333333	0.5	1	0.25	0.333333	0.5	0.333333	0.5	1	0.25	0.333333	0.5	0.25	0.333333	0.5	0.333333	0.5	1	0.333333	0.5	1	0.333333	0.5	1	0.333333
X41	0.25	0.333333	0.5	0.25	0.333333	0.5	0.25	0.333333	0.5	1	1	1	0.25	0.333333	0.5	1	2	3	1	1	1	1	2	3	1	1	1	0.333333	0.5	1	1	1	1	0.333333	0.5	1	0.333333	0.5	1	1	1	1	1	1	1	1	1	1	1
X42	0.25	0.333333	0.5	0.25	0.333333	0.5	0.25	0.333333	0.5	1	1	1	0.25	0.333333	0.5	1	2	3	1	1	1	1	2	3	1	1	1	0.333333	0.5	1	1	1	1	0.333333	0.5	1	0.333333	0.5	1	1	1	1	1	1	1	1	1	1	1
X43	0.25	0.333333	0.5	0.25	0.333333	0.5	0.25	0.333333	0.5	1	1	1	0.25	0.333333	0.5	1	2	3	1	1	1	1	2	3	1	1	1	0.333333	0.5	1	1	1	1	0.333333	0.5	1	0.333333	0.5	1	1	1	1	1	1	1	1	1	1	1
X44	0.25	0.333333	0.5	0.25	0.333333	0.5	0.25	0.333333	0.5	1	1	1	0.25	0.333333	0.5	1	2	3	1	1	1	1	2	3	1	1	1	0.333333	0.5	1	1	1	1	0.333333	0.5	1	0.333333	0.5	1	1	1	1	1	1	1	1	1	1	1
X45	0.25	0.333333	0.5	0.25	0.333333	0.5	0.25	0.333333	0.5	1	1	1	0.25	0.333333	0.5	1	2	3	1	1	1	1	2	3	1	1	1	0.333333	0.5	1	1	1	1	0.333333	0.5	1	0.333333	0.5	1	1	1	1	1	1	1	1	1	1	1
X46	0.25	0.333333	0.5	0.25	0.333333	0.5	0.25	0.333333	0.5	1	1	1	0.25	0.333333	0.5	1	2	3	1	1	1	1	2	3	1	1	1	0.333333	0.5	1	1	1	1	0.333333	0.5	1	0.333333	0.5	1	1	1	1	1	1	1	1	1	1	1
X47	0.25	0.333333	0.5	0.25	0.333333	0.5	0.25	0.333333	0.5	1	1	1	0.25	0.333333	0.5	1	2	3	1	1	1	1	2	3	1	1	1	0.333333	0.5	1	1	1	1	0.333333	0.5	1	0.333333	0.5	1	1	1	1	1	1	1	1	1	1	1
X48	0.25	0.333333	0.5	0.25	0.333333	0.5	0.25	0.333333	0.5	1	1	1	0.25	0.333333	0.5	1	2	3	1	1	1	1	2	3	1	1	1	0.333333	0.5	1	1	1	1	0.333333	0.5	1	0.333333	0.5	1	1	1	1	1	1	1	1	1	1	1
X49	0.25	0.333333	0.5	0.25	0.333333	0.5	0.25	0.333333	0.5	1	1	1	0.25	0.333333	0.5	1	2	3	1	1	1	1	2	3	1	1	1	0.333333	0.5	1	1	1	1	0.333333	0.5	1	0.333333	0.5	1	1	1	1	1	1	1	1	1	1	1
X50	0.25	0.333333	0.5	0.25	0.333333	0.5	0.25	0.333333	0.5	1	1	1	0.25	0.333333	0.5	1	2	3	1	1	1	1	2	3	1	1	1	0.333333	0.5	1	1	1	1	0.333333	0.5	1	0.333333	0.5	1	1	1	1	1	1	1	1	1	1	1
X51	0.25	0.333333	0.5	0.25	0.333333	0.5	0.25	0.333333	0.5	1	1	1	0.25	0.333333	0.5	1	2	3	1	1	1	1	2	3	1	1	1	0.333333	0.5	1	1	1	1	0.333333	0.5	1	0.333333	0.5	1	1	1	1	1	1	1	1	1	1	1
X52	0.333333	0.5	1	0.333333	0.5	1	0.333333	0.5	1	1	2	3	0.333333	0.5	1	2	3	4	1	2	3	2	3	4	1	2	3	1	1	1	1	2	3	1	1	1	1	1	1	1	2	3	1	2	3	1	2	3	1
		Geometric Mean					Fuzzy Weights			Average	Normalization
	X1	1.90286	2.78684	3.63502		X1	0.0268804	0.0482543	0.0786373	0.0512573	0.0482891
	X2	1.90286	2.78684	3.63502		X2	0.0268804	0.0482543	0.0786373	0.0512573	0.0482891
	X3	1.90286	2.78684	3.63502		X3	0.0268804	0.0482543	0.0786373	0.0512573	0.0482891
	X4	0.910913	0.969292	1.01802		X4	0.0128679	0.0167833	0.0220231	0.0172248	0.0162273
	X5	1.90286	2.78684	3.63502		X5	0.0268804	0.0482543	0.0786373	0.0512573	0.0482891
	X6	0.809305	0.514024	0.400516		X6	0.0114325	0.00890036	0.00866445	0.00966577	0.00910604
	X7	0.898851	0.969292	1.03168		X7	0.0126975	0.0167833	0.0223186	0.0172665	0.0162666
	X8	0.792386	0.514024	0.409067		X8	0.0111935	0.00890036	0.00884945	0.00964777	0.00908909
	X9	0.898851	0.969292	1.03168		X9	0.0126975	0.0167833	0.0223186	0.0172665	0.0162666
	X10	1.0361	1.80406	2.60715		X10	0.0146362	0.0312373	0.0564011	0.0340916	0.0321174
	X11	0.88006	0.969292	1.05371		X11	0.012432	0.0167833	0.0227951	0.0173368	0.0163329
	X12	1.0361	1.80406	2.60715		X12	0.0146362	0.0312373	0.0564011	0.0340916	0.0321174
	X13	1.0361	1.80406	2.60715		X13	0.0146362	0.0312373	0.0564011	0.0340916	0.0321174
	X14	0.843648	0.969292	1.09919		X14	0.0119177	0.0167833	0.023779	0.0174933	0.0164803
	X15	0.843648	0.969292	1.09919		X15	0.0119177	0.0167833	0.023779	0.0174933	0.0164803
	X16	0.843648	0.969292	1.09919		X16	0.0119177	0.0167833	0.023779	0.0174933	0.0164803
	X17	0.843648	0.969292	1.09919		X17	0.0119177	0.0167833	0.023779	0.0174933	0.0164803
	X18	0.843648	0.969292	1.09919		X18	0.0119177	0.0167833	0.023779	0.0174933	0.0164803
	X19	1.0361	1.80406	2.60715		X19	0.0146362	0.0312373	0.0564011	0.0340916	0.0321174
	X20	0.826011	0.969292	1.12266		X20	0.0116685	0.0167833	0.0242867	0.0175795	0.0165615
	X21	0.826011	0.969292	1.12266		X21	0.0116685	0.0167833	0.0242867	0.0175795	0.0165615
	X22	0.826011	0.969292	1.12266		X22	0.0116685	0.0167833	0.0242867	0.0175795	0.0165615
	X23	0.826011	0.969292	1.12266		X23	0.0116685	0.0167833	0.0242867	0.0175795	0.0165615
	X24	0.826011	0.969292	1.12266		X24	0.0116685	0.0167833	0.0242867	0.0175795	0.0165615
	X25	0.826011	0.969292	1.12266		X25	0.0116685	0.0167833	0.0242867	0.0175795	0.0165615
	X26	0.826011	0.969292	1.12266		X26	0.0116685	0.0167833	0.0242867	0.0175795	0.0165615
	X27	0.826011	0.969292	1.12266		X27	0.0116685	0.0167833	0.0242867	0.0175795	0.0165615
	X28	0.826011	0.969292	1.12266		X28	0.0116685	0.0167833	0.0242867	0.0175795	0.0165615
	X29	0.826011	0.969292	1.12266		X29	0.0116685	0.0167833	0.0242867	0.0175795	0.0165615
	X30	0.826011	0.969292	1.12266		X30	0.0116685	0.0167833	0.0242867	0.0175795	0.0165615
	X31	0.826011	0.969292	1.12266		X31	0.0116685	0.0167833	0.0242867	0.0175795	0.0165615			تقيمم fuzzy ahp		تقييم الاستبيان
	X32	0.826011	0.969292	1.12266		X32	0.0116685	0.0167833	0.0242867	0.0175795	0.0165615			1		1
	X33	0.826011	0.956457	1.12266		X33	0.0116685	0.0165611	0.0242867	0.0175054	0.0164917			3		2
	X34	0.482056	0.514024	0.672411		X34	0.00680968	0.00890036	0.0145464	0.0100855	0.00950145			5		3
	X35	0.482056	0.514024	0.672411		X35	0.00680968	0.00890036	0.0145464	0.0100855	0.00950145			7		4
	X36	0.482056	0.514024	0.672411		X36	0.00680968	0.00890036	0.0145464	0.0100855	0.00950145			9		5
	X37	0.482056	0.514024	0.672411		X37	0.00680968	0.00890036	0.0145464	0.0100855	0.00950145
	X38	0.482056	0.514024	0.672411		X38	0.00680968	0.00890036	0.0145464	0.0100855	0.00950145
	X39	0.482056	0.514024	0.672411		X39	0.00680968	0.00890036	0.0145464	0.0100855	0.00950145
	X40	0.482056	0.520922	0.672411		X40	0.00680968	0.00901979	0.0145464	0.0101253	0.00953896
	X41	0.826011	0.969292	1.12266		X41	0.0116685	0.0167833	0.0242867	0.0175795	0.0165615
	X42	0.826011	0.969292	1.12266		X42	0.0116685	0.0167833	0.0242867	0.0175795	0.0165615
	X43	0.826011	0.969292	1.12266		X43	0.0116685	0.0167833	0.0242867	0.0175795	0.0165615
	X44	0.826011	0.969292	1.12266		X44	0.0116685	0.0167833	0.0242867	0.0175795	0.0165615
	X45	0.826011	0.969292	1.12266		X45	0.0116685	0.0167833	0.0242867	0.0175795	0.0165615
	X46	0.826011	0.969292	1.12266		X46	0.0116685	0.0167833	0.0242867	0.0175795	0.0165615
	X47	0.826011	0.969292	1.12266		X47	0.0116685	0.0167833	0.0242867	0.0175795	0.0165615
	X48	0.826011	0.969292	1.12266		X48	0.0116685	0.0167833	0.0242867	0.0175795	0.0165615
	X49	0.826011	0.969292	1.12266		X49	0.0116685	0.0167833	0.0242867	0.0175795	0.0165615
	X50	0.826011	0.969292	1.12266		X50	0.0116685	0.0167833	0.0242867	0.0175795	0.0165615
	X51	0.826011	0.982299	1.12266		X51	0.0116685	0.0170086	0.0242867	0.0176546	0.0166322
	X52	1.0361	1.80041	2.60715		X52	0.0146362	0.0311742	0.0564011	0.0340705	0.0320976
	Sum	46.2252	57.7532	70.7898		Total Average				1.06147	1
	Inverse	0.0216332	0.0173151	0.0141263
	Arrange	0.0141263	0.0173151	0.0216332
[truncated: 107 more columns]

## Sheet: N (4)
	اسم الشركة	نوع الشركة	هل معتمدة ب ISO9000	تخصص الشركة	سنة التأسيس	المنصب	الدرجة العلمية الحاصل عليها	سنوات الخبرة في مجال العمل	عدد المشاريع المنفذة خلال الخمس سنوات الماضية	قيمة المشاريع المنفذة خلال الخمس سنوات الماضية (مليون جنيه مصرى)	قيمة المشروع الحالي	هل تطبق الشركة التي تعمل بها مفاهيم إدارة المشاريع ولديها نظام إدارة الجودة (QMS)	هل لديك أي علاقة بأنشطة إدارة الجودة ؟	1- طريقة تسليم المشروع أي الأجراء المحدد لإنهاء الخدمة التي يختارها العميل مثل ((Design-bid-build(DBB)/Design-build (DB)/Construction Manager at risk(CMAR)/Job order contracting /Fast track)	2- نوع العقد أي طريقة التعاقد بين الجهات المعنيه مثل (Unit price/ Lumpsum/ Cost plus fixed fee / Cost plus percentage fee/ Target cost / Other contract)	3- فئة المقاول أي درجة تصنيف المقاول طبقا لنظام تصنيف المقاولين مثل (درجة أولي - درجة ثانية - أخرى )	4- مدة المشروع أي التأخير عن الجدول الزمني المخطط لتسليم المشروع	5- موقع المشروع أي تأثير الاختيار الامثل لمكان المشروع	1- عدم متابعة العمل من قبل المشاركين في المشروع ( أي عدم قيام أطرف المشروع بمتابعه الاعمال بشكل دوري وعمل تقارير حول ما تم إنجازه )	2- عدم كفايه مواد البناء والمعدات وقطع الغيار ( أي النقص في الموارد المطلوبة وأعمال الصيانة )	3- عدم خبرة مديرين المشاريع، وفريق الإشراف في تحديد الاحتياجات ومتطلبات العمل ( أي عدم القدرة علي تحقيق التوازن بين مختلف المصالح والاحتياجات لأفراد فريق المشروع وأصحاب المصلحة )	4- عدم معرفةمدير مشروع بالتقنيات المناسبة ( أي هل تؤثر عدم معرفةمدير مشروع بالمهارات الفنية والتقنية علي تكلفة الجودة الرديئة ام معرفته بالمهارات الإدارية فقط )	5- المشاكل المتعلقة بالبيئه المحيطه للمشروع ( أي المشاكل المتعلقة بنظام البيئة مثل الهواء والماء والتربة وما إلي ذلك التي نشأت نتيجة للتدخل البشري أو سوء معاملة الأرض )	6- الخلافات والنزاعات بين المشاركين في المشروع ( أي الخلاف بين طرفي العقد بخصوص عقد المشروع او أحدي وثائقه )	7- ضعف تقنيات التخطيط والرقابة ( أي عدم تحقيق الأهداف المرسومة في ظل تحقيق الكفاءة في استخدام الموارد المتاحة )	8- عدم التنسيق بين المصممين والمقاولين ( أي عدم التنسيق بين الأطراف المشاركة لضمان التنفيذ الناجح لجميع المراحل وفقاً للأهداف المخططة )	9- عدم سرعة اتخاذ القرار بمشاركة جميع أطراف المشروع ( أي عدم القدرة علي رؤية الاختيارات المتاحة بوضوح )	10- نقص في تدريب الموارد البشرية على المهارات التي يتطلبها المشروع ( أي قله تدريب و تعزيز مهارات الموظفين لتطوير مهاراتهم وإمكانيتهم )	11- عدم التزام الإدارة بالتحسين المستمر للجودة ( أي قلة العمل علي تطوير العمليات والأنشطة المتعلقة بالالأت و المواد والأفراد وطرق الأنتاج بشكل مستمر )	12- عدم حساب تكلفة الجودة المخططة للمشروع ( أي عدم حساب التكاليف التي تتكبدها الشركة للتأكد من أن منتجاتها أو خدمتها تلبي معايير الجودة المطلوبة )	13- عدم خبرة فريق الإشراف ( أي عدم كفاءة التوجيه والإشراف علي الأعمال )	14- ترددمدير مشروع في اتخاذ القرار المالي ( أي عدم قدرةمدير مشروع في اي تغيير او تعديل علي سبيل المثال تغيير الميزانية المقدرة للمشروع )	15- التردد في اتخاذ القرار في الوقت المناسب من قبلمدير مشروع ( أي المماطلة المزمنة عند إتخاذ القرارات )	16- ضعف الإشراف ومتابعة العمل خلال ساعات العمل الإضافية ( أي ضعف تتبع ساعات نظام العمل الإضافي )	17- عدم مطابقة أهداف الجودة للمعايير والمواصفات ( أي عدم المطابقة لمتطلبات و مواصفات او خصائص معينة قادرة علي الوفاء بالمعايير والمتطلبات المتعارف عليها في المؤسسات المماثلة )	18- ضعف القيادة الفعالة لإدارة المشروع ( أي عدم القدرة علي توجيه وتحفيز الأفراد لتحقيق أهداف محددة )	19- عدم استخدام القوى العاملة الماهرة في التنفيذ ( أي تعيين عمالة بخبرات ضعيفة في أعمال التنفيذ )	20- عدم تخطيط التدفق النقدي ( أي عدم تطبيق نظام لمتابعة حركة الأموال داخل الشركة كل شهر اوخلال فترة معينة )	21- عدم وضوح الهيكل التنظيمي للعاملين بالمشروع ( أي عدم توضيح التنظيم والهيكل الإدراي للمؤسسة وتوزيع المهامات بفاعلية )	22- عدم استخدام أنظمة المشتريات المتكاملة ( أي ضعف ادارة عملية الشراء وعدم تحديد اهم احتياجات المنظمة )	23- ضعف التركيز علي عملية النفقات والمشتريات ( أي عدم متابعة الميزانية والتدفق النقدي )	24- ضعف الإنتاجية ( أي عدم إيجاد نظم وحلول جديدة لاستغلال الموارد المتاحة لتحقيق اعلي جودة في أفضل وقت وبأقل تكاليف ممكنة )	25- ضعف جودة الموارد المستخدمة ( أي عدم مطابقة الموارد للمواصفات و المعايير الفنية )	26- الفجوة بين الجدول الزمني المخطط والفعلي ( أي وجود فرق بين الوقت المخطط والوقت الفعلي المستغرق لإتمام المشروع )	27- الفجوة بين التكلفة المخططة والتكلفة الفعلية ( أي وجود فرق بين التكلفة المخططة والتكلفة الفعلية لإتمام المشروع )	28- الفجوة بين الهدف المخطط والفعلي ( أي وجود اختلاف بين الأداء الفعلي و الأداء المتوقع مستقبليأ للمؤسسة )	1- إهدار الموارد في الموقع ( أي إستخدام الموارد سواء مواد او ومعدات او عمالة بشكل غير جيد )	2- نقص الخبرة والموارد الفنية والمهنية لأداء المهمة ( أي ضعف المهارات لتقييم متطلبات المشروع وتحقيق النتايج المطلوبة )	3- عدم الوعي بالجودة لفريق المشروع ( أي عدم فهم قيمة الجودة والدقة في العمل لتقديم الخدمة بأفضل طريقة )
4	شركه قصور الحمد للمقاولات	خاصة	نعم	مقاول	2004	مهندس مكتب	بكالوريوس	من 3 إلي أقل من 5 سنوات	من 5 إلي أقل من 10	من 50 إلي أقل من 100	٨٠ مليون	نعم	نعم	4	4	3	4	3	1	1	1	1	1	1	1	1	1	1	1	1	1	1	1	1	1	1	1	1	1	1	1	1	1	1	1	1	1	1	1
													4	X1	X2	X3	X4	X5	X6	X7	X8	X9	X10	X11	X12	X13	X14	X15	X16	X17	X18	X19	X20	X21	X22	X23	X24	X25	X26	X27	X28	X29	X30	X31	X32	X33	X34	X35	X36
														4	4	3	4	3	1	1	1	1	1	1	1	1	1	1	1	1	1	1	1	1	1	1	1	1	1	1	1	1	1	1	1	1	1	1	1
	X1			X2			X3			X4			X5			X6			X7			X8			X9			X10			X11			X12			X13			X14			X15			X16			X17
X1	1	1	1	1	1	1	1	2	3	1	1	1	1	2	3	3	4	5	3	4	5	3	4	5	3	4	5	3	4	5	3	4	5	3	4	5	3	4	5	3	4	5	3	4	5	3	4	5	3
X2	1	1	1	1	1	1	1	2	3	1	1	1	1	2	3	3	4	5	3	4	5	3	4	5	3	4	5	3	4	5	3	4	5	3	4	5	3	4	5	3	4	5	3	4	5	3	4	5	3
X3	0.333333	0.5	1	0.333333	0.5	1	1	1	1	1	0.5	0.333333	1	1	1	2	3	4	2	3	4	2	3	4	2	3	4	2	3	4	2	3	4	2	3	4	2	3	4	2	3	4	2	3	4	2	3	4	2
X4	1	1	1	1	1	1	1	2	3	1	1	1	1	2	3	3	4	5	3	4	5	3	4	5	3	4	5	3	4	5	3	4	5	3	4	5	3	4	5	3	4	5	3	4	5	3	4	5	3
X5	0.333333	0.5	1	0.333333	0.5	1	1	1	1	0.333333	0.5	1	1	1	1	2	3	4	2	3	4	2	3	4	2	3	4	2	3	4	2	3	4	2	3	4	2	3	4	2	3	4	2	3	4	2	3	4	2
X6	0.2	0.25	0.333333	0.2	0.25	0.333333	0.25	0.333333	0.5	0.2	0.25	0.333333	0.25	0.333333	0.5	1	1	1	1	1	1	1	1	1	1	1	1	1	1	1	1	1	1	1	1	1	1	1	1	1	1	1	1	1	1	1	1	1	1
X7	0.2	0.25	0.333333	0.2	0.25	0.333333	0.25	0.333333	0.5	0.2	0.25	0.333333	0.25	0.333333	0.5	1	1	1	1	1	1	1	1	1	1	1	1	1	1	1	1	1	1	1	1	1	1	1	1	1	1	1	1	1	1	1	1	1	1
X8	0.2	0.25	0.333333	0.2	0.25	0.333333	0.25	0.333333	0.5	0.2	0.25	0.333333	0.25	0.333333	0.5	1	1	1	1	1	1	1	1	1	1	1	1	1	1	1	1	1	1	1	1	1	1	1	1	1	1	1	1	1	1	1	1	1	1
X9	0.2	0.25	0.333333	0.2	0.25	0.333333	0.25	0.333333	0.5	0.2	0.25	0.333333	0.25	0.333333	0.5	1	1	1	1	1	1	1	1	1	1	1	1	1	1	1	1	1	1	1	1	1	1	1	1	1	1	1	1	1	1	1	1	1	1
X10	0.2	0.25	0.333333	0.2	0.25	0.333333	0.25	0.333333	0.5	0.2	0.25	0.333333	0.25	0.333333	0.5	1	1	1	1	1	1	1	1	1	1	1	1	1	1	1	1	1	1	1	1	1	1	1	1	1	1	1	1	1	1	1	1	1	1
X11	0.2	0.25	0.333333	0.2	0.25	0.333333	0.25	0.333333	0.5	0.2	0.25	0.333333	0.25	0.333333	0.5	1	1	1	1	1	1	1	1	1	1	1	1	1	1	1	1	1	1	1	1	1	1	1	1	1	1	1	1	1	1	1	1	1	1
X12	0.2	0.25	0.333333	0.2	0.25	0.333333	0.25	0.333333	0.5	0.2	0.25	0.333333	0.25	0.333333	0.5	1	1	1	1	1	1	1	1	1	1	1	1	1	1	1	1	1	1	1	1	1	1	1	1	1	1	1	1	1	1	1	1	1	1
X13	0.2	0.25	0.333333	0.2	0.25	0.333333	0.25	0.333333	0.5	0.2	0.25	0.333333	0.25	0.333333	0.5	1	1	1	1	1	1	1	1	1	1	1	1	1	1	1	1	1	1	1	1	1	1	1	1	1	1	1	1	1	1	1	1	1	1
X14	0.2	0.25	0.333333	0.2	0.25	0.333333	0.25	0.333333	0.5	0.2	0.25	0.333333	0.25	0.333333	0.5	1	1	1	1	1	1	1	1	1	1	1	1	1	1	1	1	1	1	1	1	1	1	1	1	1	1	1	1	1	1	1	1	1	1
X15	0.2	0.25	0.333333	0.2	0.25	0.333333	0.25	0.333333	0.5	0.2	0.25	0.333333	0.25	0.333333	0.5	1	1	1	1	1	1	1	1	1	1	1	1	1	1	1	1	1	1	1	1	1	1	1	1	1	1	1	1	1	1	1	1	1	1
X16	0.2	0.25	0.333333	0.2	0.25	0.333333	0.25	0.333333	0.5	0.2	0.25	0.333333	0.25	0.333333	0.5	1	1	1	1	1	1	1	1	1	1	1	1	1	1	1	1	1	1	1	1	1	1	1	1	1	1	1	1	1	1	1	1	1	1
X17	0.2	0.25	0.333333	0.2	0.25	0.333333	0.25	0.333333	0.5	0.2	0.25	0.333333	0.25	0.333333	0.5	1	1	1	1	1	1	1	1	1	1	1	1	1	1	1	1	1	1	1	1	1	1	1	1	1	1	1	1	1	1	1	1	1	1
X18	0.2	0.25	0.333333	0.2	0.25	0.333333	0.25	0.333333	0.5	0.2	0.25	0.333333	0.25	0.333333	0.5	1	1	1	1	1	1	1	1	1	1	1	1	1	1	1	1	1	1	1	1	1	1	1	1	1	1	1	1	1	1	1	1	1	1
X19	0.2	0.25	0.333333	0.2	0.25	0.333333	0.25	0.333333	0.5	0.2	0.25	0.333333	0.25	0.333333	0.5	1	1	1	1	1	1	1	1	1	1	1	1	1	1	1	1	1	1	1	1	1	1	1	1	1	1	1	1	1	1	1	1	1	1
X20	0.2	0.25	0.333333	0.2	0.25	0.333333	0.25	0.333333	0.5	0.2	0.25	0.333333	0.25	0.333333	0.5	1	1	1	1	1	1	1	1	1	1	1	1	1	1	1	1	1	1	1	1	1	1	1	1	1	1	1	1	1	1	1	1	1	1
X21	0.2	0.25	0.333333	0.2	0.25	0.333333	0.25	0.333333	0.5	0.2	0.25	0.333333	0.25	0.333333	0.5	1	1	1	1	1	1	1	1	1	1	1	1	1	1	1	1	1	1	1	1	1	1	1	1	1	1	1	1	1	1	1	1	1	1
X22	0.2	0.25	0.333333	0.2	0.25	0.333333	0.25	0.333333	0.5	0.2	0.25	0.333333	0.25	0.333333	0.5	1	1	1	1	1	1	1	1	1	1	1	1	1	1	1	1	1	1	1	1	1	1	1	1	1	1	1	1	1	1	1	1	1	1
X23	0.2	0.25	0.333333	0.2	0.25	0.333333	0.25	0.333333	0.5	0.2	0.25	0.333333	0.25	0.333333	0.5	1	1	1	1	1	1	1	1	1	1	1	1	1	1	1	1	1	1	1	1	1	1	1	1	1	1	1	1	1	1	1	1	1	1
X24	0.2	0.25	0.333333	0.2	0.25	0.333333	0.25	0.333333	0.5	0.2	0.25	0.333333	0.25	0.333333	0.5	1	1	1	1	1	1	1	1	1	1	1	1	1	1	1	1	1	1	1	1	1	1	1	1	1	1	1	1	1	1	1	1	1	1
X25	0.2	0.25	0.333333	0.2	0.25	0.333333	0.25	0.333333	0.5	0.2	0.25	0.333333	0.25	0.333333	0.5	1	1	1	1	1	1	1	1	1	1	1	1	1	1	1	1	1	1	1	1	1	1	1	1	1	1	1	1	1	1	1	1	1	1
X26	0.2	0.25	0.333333	0.2	0.25	0.333333	0.25	0.333333	0.5	0.2	0.25	0.333333	0.25	0.333333	0.5	1	1	1	1	1	1	1	1	1	1	1	1	1	1	1	1	1	1	1	1	1	1	1	1	1	1	1	1	1	1	1	1	1	1
X27	0.2	0.25	0.333333	0.2	0.25	0.333333	0.25	0.333333	0.5	0.2	0.25	0.333333	0.25	0.333333	0.5	1	1	1	1	1	1	1	1	1	1	1	1	1	1	1	1	1	1	1	1	1	1	1	1	1	1	1	1	1	1	1	1	1	1
X28	0.2	0.25	0.333333	0.2	0.25	0.333333	0.25	0.333333	0.5	0.2	0.25	0.333333	0.25	0.333333	0.5	1	1	1	1	1	1	1	1	1	1	1	1	1	1	1	1	1	1	1	1	1	1	1	1	1	1	1	1	1	1	1	1	1	1
X29	0.2	0.25	0.333333	0.2	0.25	0.333333	0.25	0.333333	0.5	0.2	0.25	0.333333	0.25	0.333333	0.5	1	1	1	1	1	1	1	1	1	1	1	1	1	1	1	1	1	1	1	1	1	1	1	1	1	1	1	1	1	1	1	1	1	1
X30	0.2	0.25	0.333333	0.2	0.25	0.333333	0.25	0.333333	0.5	0.2	0.25	0.333333	0.25	0.333333	0.5	1	1	1	1	1	1	1	1	1	1	1	1	1	1	1	1	1	1	1	1	1	1	1	1	1	1	1	1	1	1	1	1	1	1
X31	0.2	0.25	0.333333	0.2	0.25	0.333333	0.25	0.333333	0.5	0.2	0.25	0.333333	0.25	0.333333	0.5	1	1	1	1	1	1	1	1	1	1	1	1	1	1	1	1	1	1	1	1	1	1	1	1	1	1	1	1	1	1	1	1	1	1
X32	0.2	0.25	0.333333	0.2	0.25	0.333333	0.25	0.333333	0.5	0.2	0.25	0.333333	0.25	0.333333	0.5	1	1	1	1	1	1	1	1	1	1	1	1	1	1	1	1	1	1	1	1	1	1	1	1	1	1	1	1	1	1	1	1	1	1
X33	0.2	0.25	0.333333	0.2	0.25	0.333333	0.25	0.333333	0.5	0.2	0.25	0.333333	0.25	0.333333	0.5	1	1	1	1	1	1	1	1	1	1	1	1	1	1	1	1	1	1	1	1	1	1	1	1	1	1	1	1	1	1	1	1	1	1
X34	0.2	0.25	0.333333	0.2	0.25	0.333333	0.25	0.333333	0.5	0.2	0.25	0.333333	0.25	0.333333	0.5	1	1	1	1	1	1	1	1	1	1	1	1	1	1	1	1	1	1	1	1	1	1	1	1	1	1	1	1	1	1	1	1	1	1
X35	0.2	0.25	0.333333	0.2	0.25	0.333333	0.25	0.333333	0.5	0.2	0.25	0.333333	0.25	0.333333	0.5	1	1	1	1	1	1	1	1	1	1	1	1	1	1	1	1	1	1	1	1	1	1	1	1	1	1	1	1	1	1	1	1	1	1
X36	0.2	0.25	0.333333	0.2	0.25	0.333333	0.25	0.333333	0.5	0.2	0.25	0.333333	0.25	0.333333	0.5	1	1	1	1	1	1	1	1	1	1	1	1	1	1	1	1	1	1	1	1	1	1	1	1	1	1	1	1	1	1	1	1	1	1
X37	0.2	0.25	0.333333	0.2	0.25	0.333333	0.25	0.333333	0.5	0.2	0.25	0.333333	0.25	0.333333	0.5	1	1	1	1	1	1	1	1	1	1	1	1	1	1	1	1	1	1	1	1	1	1	1	1	1	1	1	1	1	1	1	1	1	1
X38	0.2	0.25	0.333333	0.2	0.25	0.333333	0.25	0.333333	0.5	0.2	0.25	0.333333	0.25	0.333333	0.5	1	1	1	1	1	1	1	1	1	1	1	1	1	1	1	1	1	1	1	1	1	1	1	1	1	1	1	1	1	1	1	1	1	1
X39	0.2	0.25	0.333333	0.2	0.25	0.333333	0.25	0.333333	0.5	0.2	0.25	0.333333	0.25	0.333333	0.5	1	1	1	1	1	1	1	1	1	1	1	1	1	1	1	1	1	1	1	1	1	1	1	1	1	1	1	1	1	1	1	1	1	1
X40	0.2	0.25	0.333333	0.2	0.25	0.333333	0.25	0.333333	0.5	0.2	0.25	0.333333	0.25	0.333333	0.5	1	1	1	1	1	1	1	1	1	1	1	1	1	1	1	1	1	1	1	1	1	1	1	1	1	1	1	1	1	1	1	1	1	1
X41	0.2	0.25	0.333333	0.2	0.25	0.333333	0.25	0.333333	0.5	0.2	0.25	0.333333	0.25	0.333333	0.5	1	1	1	1	1	1	1	1	1	1	1	1	1	1	1	1	1	1	1	1	1	1	1	1	1	1	1	1	1	1	1	1	1	1
X42	0.2	0.25	0.333333	0.2	0.25	0.333333	0.25	0.333333	0.5	0.2	0.25	0.333333	0.25	0.333333	0.5	1	1	1	1	1	1	1	1	1	1	1	1	1	1	1	1	1	1	1	1	1	1	1	1	1	1	1	1	1	1	1	1	1	1
X43	0.2	0.25	0.333333	0.2	0.25	0.333333	0.25	0.333333	0.5	0.2	0.25	0.333333	0.25	0.333333	0.5	1	1	1	1	1	1	1	1	1	1	1	1	1	1	1	1	1	1	1	1	1	1	1	1	1	1	1	1	1	1	1	1	1	1
X44	0.2	0.25	0.333333	0.2	0.25	0.333333	0.25	0.333333	0.5	0.2	0.25	0.333333	0.25	0.333333	0.5	1	1	1	1	1	1	1	1	1	1	1	1	1	1	1	1	1	1	1	1	1	1	1	1	1	1	1	1	1	1	1	1	1	1
X45	0.2	0.25	0.333333	0.2	0.25	0.333333	0.25	0.333333	0.5	0.2	0.25	0.333333	0.25	0.333333	0.5	1	1	1	1	1	1	1	1	1	1	1	1	1	1	1	1	1	1	1	1	1	1	1	1	1	1	1	1	1	1	1	1	1	1
X46	0.2	0.25	0.333333	0.2	0.25	0.333333	0.25	0.333333	0.5	0.2	0.25	0.333333	0.25	0.333333	0.5	1	1	1	1	1	1	1	1	1	1	1	1	1	1	1	1	1	1	1	1	1	1	1	1	1	1	1	1	1	1	1	1	1	1
X47	0.2	0.25	0.333333	0.2	0.25	0.333333	0.25	0.333333	0.5	0.2	0.25	0.333333	0.25	0.333333	0.5	1	1	1	1	1	1	1	1	1	1	1	1	1	1	1	1	1	1	1	1	1	1	1	1	1	1	1	1	1	1	1	1	1	1
X48	0.2	0.25	0.333333	0.2	0.25	0.333333	0.25	0.333333	0.5	0.2	0.25	0.333333	0.25	0.333333	0.5	1	1	1	1	1	1	1	1	1	1	1	1	1	1	1	1	1	1	1	1	1	1	1	1	1	1	1	1	1	1	1	1	1	1
X49	0.2	0.25	0.333333	0.2	0.25	0.333333	0.25	0.333333	0.5	0.2	0.25	0.333333	0.25	0.333333	0.5	1	1	1	1	1	1	1	1	1	1	1	1	1	1	1	1	1	1	1	1	1	1	1	1	1	1	1	1	1	1	1	1	1	1
X50	0.2	0.25	0.333333	0.2	0.25	0.333333	0.25	0.333333	0.5	0.2	0.25	0.333333	0.25	0.333333	0.5	1	1	1	1	1	1	1	1	1	1	1	1	1	1	1	1	1	1	1	1	1	1	1	1	1	1	1	1	1	1	1	1	1	1
X51	0.2	0.25	0.333333	0.2	0.25	0.333333	0.25	0.333333	0.5	0.2	0.25	0.333333	0.25	0.333333	0.5	1	1	1	1	1	1	1	1	1	1	1	1	1	1	1	1	1	1	1	1	1	1	1	1	1	1	1	1	1	1	1	1	1	1
X52	0.2	0.25	0.333333	0.2	0.25	0.333333	0.25	0.333333	0.5	0.2	0.25	0.333333	0.25	0.333333	0.5	1	1	1	1	1	1	1	1	1	1	1	1	1	1	1	1	1	1	1	1	1	1	1	1	1	1	1	1	1	1	1	1	1	1
		Geometric Mean					Fuzzy Weights			Average	Normalization
	X1	2.69926	3.5954	4.46799		X1	0.0426521	0.06246	0.0855019	0.063538	0.0627684
	X2	2.69926	3.5954	4.46799		X2	0.0426521	0.06246	0.0855019	0.063538	0.0627684
	X3	1.79363	2.59345	3.42763		X3	0.028342	0.0450538	0.0655931	0.0463296	0.0457684
	X4	2.69926	3.5954	4.46799		X4	0.0426521	0.06246	0.0855019	0.063538	0.0627684
	X5	1.75614	2.59345	3.50082		X5	0.0277495	0.0450538	0.0669936	0.046599	0.0460345
	X6	0.86401	0.884942	0.913894		X6	0.0136526	0.0153734	0.0174888	0.0155049	0.0153171
	X7	0.86401	0.884942	0.913894		X7	0.0136526	0.0153734	0.0174888	0.0155049	0.0153171
	X8	0.86401	0.884942	0.913894		X8	0.0136526	0.0153734	0.0174888	0.0155049	0.0153171
	X9	0.86401	0.884942	0.913894		X9	0.0136526	0.0153734	0.0174888	0.0155049	0.0153171
	X10	0.86401	0.884942	0.913894		X10	0.0136526	0.0153734	0.0174888	0.0155049	0.0153171
	X11	0.86401	0.884942	0.913894		X11	0.0136526	0.0153734	0.0174888	0.0155049	0.0153171
	X12	0.86401	0.884942	0.913894		X12	0.0136526	0.0153734	0.0174888	0.0155049	0.0153171
	X13	0.86401	0.884942	0.913894		X13	0.0136526	0.0153734	0.0174888	0.0155049	0.0153171
	X14	0.86401	0.884942	0.913894		X14	0.0136526	0.0153734	0.0174888	0.0155049	0.0153171
	X15	0.86401	0.884942	0.913894		X15	0.0136526	0.0153734	0.0174888	0.0155049	0.0153171
	X16	0.86401	0.884942	0.913894		X16	0.0136526	0.0153734	0.0174888	0.0155049	0.0153171
	X17	0.86401	0.884942	0.913894		X17	0.0136526	0.0153734	0.0174888	0.0155049	0.0153171
	X18	0.86401	0.884942	0.913894		X18	0.0136526	0.0153734	0.0174888	0.0155049	0.0153171
	X19	0.86401	0.884942	0.913894		X19	0.0136526	0.0153734	0.0174888	0.0155049	0.0153171
	X20	0.86401	0.884942	0.913894		X20	0.0136526	0.0153734	0.0174888	0.0155049	0.0153171
	X21	0.86401	0.884942	0.913894		X21	0.0136526	0.0153734	0.0174888	0.0155049	0.0153171
	X22	0.86401	0.884942	0.913894		X22	0.0136526	0.0153734	0.0174888	0.0155049	0.0153171
	X23	0.86401	0.884942	0.913894		X23	0.0136526	0.0153734	0.0174888	0.0155049	0.0153171
	X24	0.86401	0.884942	0.913894		X24	0.0136526	0.0153734	0.0174888	0.0155049	0.0153171
	X25	0.86401	0.884942	0.913894		X25	0.0136526	0.0153734	0.0174888	0.0155049	0.0153171
	X26	0.86401	0.884942	0.913894		X26	0.0136526	0.0153734	0.0174888	0.0155049	0.0153171
	X27	0.86401	0.884942	0.913894		X27	0.0136526	0.0153734	0.0174888	0.0155049	0.0153171
	X28	0.86401	0.884942	0.913894		X28	0.0136526	0.0153734	0.0174888	0.0155049	0.0153171
	X29	0.86401	0.884942	0.913894		X29	0.0136526	0.0153734	0.0174888	0.0155049	0.0153171
	X30	0.86401	0.884942	0.913894		X30	0.0136526	0.0153734	0.0174888	0.0155049	0.0153171
	X31	0.86401	0.884942	0.913894		X31	0.0136526	0.0153734	0.0174888	0.0155049	0.0153171			تقيمم fuzzy ahp		تقييم الاستبيان
	X32	0.86401	0.884942	0.913894		X32	0.0136526	0.0153734	0.0174888	0.0155049	0.0153171			1		1
	X33	0.86401	0.884942	0.913894		X33	0.0136526	0.0153734	0.0174888	0.0155049	0.0153171			3		2
	X34	0.86401	0.884942	0.913894		X34	0.0136526	0.0153734	0.0174888	0.0155049	0.0153171			5		3
	X35	0.86401	0.884942	0.913894		X35	0.0136526	0.0153734	0.0174888	0.0155049	0.0153171			7		4
	X36	0.86401	0.884942	0.913894		X36	0.0136526	0.0153734	0.0174888	0.0155049	0.0153171			9		5
	X37	0.86401	0.884942	0.913894		X37	0.0136526	0.0153734	0.0174888	0.0155049	0.0153171
	X38	0.86401	0.884942	0.913894		X38	0.0136526	0.0153734	0.0174888	0.0155049	0.0153171
	X39	0.86401	0.884942	0.913894		X39	0.0136526	0.0153734	0.0174888	0.0155049	0.0153171
	X40	0.86401	0.884942	0.913894		X40	0.0136526	0.0153734	0.0174888	0.0155049	0.0153171
	X41	0.86401	0.884942	0.913894		X41	0.0136526	0.0153734	0.0174888	0.0155049	0.0153171
	X42	0.86401	0.884942	0.913894		X42	0.0136526	0.0153734	0.0174888	0.0155049	0.0153171
	X43	0.86401	0.884942	0.913894		X43	0.0136526	0.0153734	0.0174888	0.0155049	0.0153171
	X44	0.86401	0.884942	0.913894		X44	0.0136526	0.0153734	0.0174888	0.0155049	0.0153171
	X45	0.86401	0.884942	0.913894		X45	0.0136526	0.0153734	0.0174888	0.0155049	0.0153171
	X46	0.86401	0.884942	0.913894		X46	0.0136526	0.0153734	0.0174888	0.0155049	0.0153171
	X47	0.86401	0.884942	0.913894		X47	0.0136526	0.0153734	0.0174888	0.0155049	0.0153171
	X48	0.86401	0.884942	0.913894		X48	0.0136526	0.0153734	0.0174888	0.0155049	0.0153171
	X49	0.86401	0.884942	0.913894		X49	0.0136526	0.0153734	0.0174888	0.0155049	0.0153171
	X50	0.86401	0.884942	0.913894		X50	0.0136526	0.0153734	0.0174888	0.0155049	0.0153171
	X51	0.86401	0.884942	0.913894		X51	0.0136526	0.0153734	0.0174888	0.0155049	0.0153171
	X52	0.86401	0.882824	0.913894		X52	0.0136526	0.0153366	0.0174888	0.0154926	0.015305
	Sum	52.256	57.5633	63.2854		Total Average				1.01226	1
	Inverse	0.0191366	0.0173722	0.0158014
	Arrange	0.0158014	0.0173722	0.0191366
[truncated: 107 more columns]

## Sheet: N (5)
	اسم الشركة	نوع الشركة	هل معتمدة ب ISO9000	تخصص الشركة	سنة التأسيس	المنصب	الدرجة العلمية الحاصل عليها	سنوات الخبرة في مجال العمل	عدد المشاريع المنفذة خلال الخمس سنوات الماضية	قيمة المشاريع المنفذة خلال الخمس سنوات الماضية (مليون جنيه مصرى)	قيمة المشروع الحالي	هل تطبق الشركة التي تعمل بها مفاهيم إدارة المشاريع ولديها نظام إدارة الجودة (QMS)	هل لديك أي علاقة بأنشطة إدارة الجودة ؟	1- طريقة تسليم المشروع أي الأجراء المحدد لإنهاء الخدمة التي يختارها العميل مثل ((Design-bid-build(DBB)/Design-build (DB)/Construction Manager at risk(CMAR)/Job order contracting /Fast track)	2- نوع العقد أي طريقة التعاقد بين الجهات المعنيه مثل (Unit price/ Lumpsum/ Cost plus fixed fee / Cost plus percentage fee/ Target cost / Other contract)	3- فئة المقاول أي درجة تصنيف المقاول طبقا لنظام تصنيف المقاولين مثل (درجة أولي - درجة ثانية - أخرى )	4- مدة المشروع أي التأخير عن الجدول الزمني المخطط لتسليم المشروع	5- موقع المشروع أي تأثير الاختيار الامثل لمكان المشروع	1- عدم متابعة العمل من قبل المشاركين في المشروع ( أي عدم قيام أطرف المشروع بمتابعه الاعمال بشكل دوري وعمل تقارير حول ما تم إنجازه )	2- عدم كفايه مواد البناء والمعدات وقطع الغيار ( أي النقص في الموارد المطلوبة وأعمال الصيانة )	3- عدم خبرة مديرين المشاريع، وفريق الإشراف في تحديد الاحتياجات ومتطلبات العمل ( أي عدم القدرة علي تحقيق التوازن بين مختلف المصالح والاحتياجات لأفراد فريق المشروع وأصحاب المصلحة )	4- عدم معرفةمدير مشروع بالتقنيات المناسبة ( أي هل تؤثر عدم معرفةمدير مشروع بالمهارات الفنية والتقنية علي تكلفة الجودة الرديئة ام معرفته بالمهارات الإدارية فقط )	5- المشاكل المتعلقة بالبيئه المحيطه للمشروع ( أي المشاكل المتعلقة بنظام البيئة مثل الهواء والماء والتربة وما إلي ذلك التي نشأت نتيجة للتدخل البشري أو سوء معاملة الأرض )	6- الخلافات والنزاعات بين المشاركين في المشروع ( أي الخلاف بين طرفي العقد بخصوص عقد المشروع او أحدي وثائقه )	7- ضعف تقنيات التخطيط والرقابة ( أي عدم تحقيق الأهداف المرسومة في ظل تحقيق الكفاءة في استخدام الموارد المتاحة )	8- عدم التنسيق بين المصممين والمقاولين ( أي عدم التنسيق بين الأطراف المشاركة لضمان التنفيذ الناجح لجميع المراحل وفقاً للأهداف المخططة )	9- عدم سرعة اتخاذ القرار بمشاركة جميع أطراف المشروع ( أي عدم القدرة علي رؤية الاختيارات المتاحة بوضوح )	10- نقص في تدريب الموارد البشرية على المهارات التي يتطلبها المشروع ( أي قله تدريب و تعزيز مهارات الموظفين لتطوير مهاراتهم وإمكانيتهم )	11- عدم التزام الإدارة بالتحسين المستمر للجودة ( أي قلة العمل علي تطوير العمليات والأنشطة المتعلقة بالالأت و المواد والأفراد وطرق الأنتاج بشكل مستمر )	12- عدم حساب تكلفة الجودة المخططة للمشروع ( أي عدم حساب التكاليف التي تتكبدها الشركة للتأكد من أن منتجاتها أو خدمتها تلبي معايير الجودة المطلوبة )	13- عدم خبرة فريق الإشراف ( أي عدم كفاءة التوجيه والإشراف علي الأعمال )	14- ترددمدير مشروع في اتخاذ القرار المالي ( أي عدم قدرةمدير مشروع في اي تغيير او تعديل علي سبيل المثال تغيير الميزانية المقدرة للمشروع )	15- التردد في اتخاذ القرار في الوقت المناسب من قبلمدير مشروع ( أي المماطلة المزمنة عند إتخاذ القرارات )	16- ضعف الإشراف ومتابعة العمل خلال ساعات العمل الإضافية ( أي ضعف تتبع ساعات نظام العمل الإضافي )	17- عدم مطابقة أهداف الجودة للمعايير والمواصفات ( أي عدم المطابقة لمتطلبات و مواصفات او خصائص معينة قادرة علي الوفاء بالمعايير والمتطلبات المتعارف عليها في المؤسسات المماثلة )	18- ضعف القيادة الفعالة لإدارة المشروع ( أي عدم القدرة علي توجيه وتحفيز الأفراد لتحقيق أهداف محددة )	19- عدم استخدام القوى العاملة الماهرة في التنفيذ ( أي تعيين عمالة بخبرات ضعيفة في أعمال التنفيذ )	20- عدم تخطيط التدفق النقدي ( أي عدم تطبيق نظام لمتابعة حركة الأموال داخل الشركة كل شهر اوخلال فترة معينة )	21- عدم وضوح الهيكل التنظيمي للعاملين بالمشروع ( أي عدم توضيح التنظيم والهيكل الإدراي للمؤسسة وتوزيع المهامات بفاعلية )	22- عدم استخدام أنظمة المشتريات المتكاملة ( أي ضعف ادارة عملية الشراء وعدم تحديد اهم احتياجات المنظمة )	23- ضعف التركيز علي عملية النفقات والمشتريات ( أي عدم متابعة الميزانية والتدفق النقدي )	24- ضعف الإنتاجية ( أي عدم إيجاد نظم وحلول جديدة لاستغلال الموارد المتاحة لتحقيق اعلي جودة في أفضل وقت وبأقل تكاليف ممكنة )	25- ضعف جودة الموارد المستخدمة ( أي عدم مطابقة الموارد للمواصفات و المعايير الفنية )	26- الفجوة بين الجدول الزمني المخطط والفعلي ( أي وجود فرق بين الوقت المخطط والوقت الفعلي المستغرق لإتمام المشروع )	27- الفجوة بين التكلفة المخططة والتكلفة الفعلية ( أي وجود فرق بين التكلفة المخططة والتكلفة الفعلية لإتمام المشروع )	28- الفجوة بين الهدف المخطط والفعلي ( أي وجود اختلاف بين الأداء الفعلي و الأداء المتوقع مستقبليأ للمؤسسة )	1- إهدار الموارد في الموقع ( أي إستخدام الموارد سواء مواد او ومعدات او عمالة بشكل غير جيد )	2- نقص الخبرة والموارد الفنية والمهنية لأداء المهمة ( أي ضعف المهارات لتقييم متطلبات المشروع وتحقيق النتايج المطلوبة )	3- عدم الوعي بالجودة لفريق المشروع ( أي عدم فهم قيمة الجودة والدقة في العمل لتقديم الخدمة بأفضل طريقة )
5	Nature for engineering consultancy	خاصة	نعم	استشاري	2018	مهندس مكتب	بكالوريوس	من 5 إلي 10 سنوات	من 5 إلي أقل من 10	أكثر من 500	2.5 مليار	نعم	نعم	2	3	5	5	3	5	4	5	5	3	2	4	5	2	4	3	3	5	3	5	4	2	3	2	3	5	5	3	2	4	3	2	4	4	4	4
													5	X1	X2	X3	X4	X5	X6	X7	X8	X9	X10	X11	X12	X13	X14	X15	X16	X17	X18	X19	X20	X21	X22	X23	X24	X25	X26	X27	X28	X29	X30	X31	X32	X33	X34	X35	X36
														2	3	5	5	3	5	4	5	5	3	2	4	5	2	4	3	3	5	3	5	4	2	3	2	3	5	5	3	2	4	3	2	4	4	4	4
	X1			X2			X3			X4			X5			X6			X7			X8			X9			X10			X11			X12			X13			X14			X15			X16			X17
X1	1	1	1	1	0.5	0.333333	0.333333	0.25	0.2	0.333333	0.25	0.2	1	0.5	0.333333	0.333333	0.25	0.2	0.5	0.333333	0.25	0.333333	0.25	0.2	0.333333	0.25	0.2	1	0.5	0.333333	1	1	1	0.5	0.333333	0.25	0.333333	0.25	0.2	1	1	1	0.5	0.333333	0.25	1	0.5	0.333333	1
X2	1	2	3	1	1	1	0.5	0.333333	0.25	0.5	0.333333	0.25	1	1	1	0.5	0.333333	0.25	1	0.5	0.333333	0.5	0.333333	0.25	0.5	0.333333	0.25	1	1	1	1	2	3	1	0.5	0.333333	0.5	0.333333	0.25	1	2	3	1	0.5	0.333333	1	1	1	1
X3	3	4	5	2	3	4	1	1	1	1	1	1	2	3	4	1	1	1	1	2	3	1	1	1	1	1	1	2	3	4	3	4	5	1	2	3	1	1	1	3	4	5	1	2	3	2	3	4	2
X4	3	4	5	2	3	4	1	1	1	1	1	1	2	3	4	1	1	1	1	2	3	1	1	1	1	1	1	2	3	4	3	4	5	1	2	3	1	1	1	3	4	5	1	2	3	2	3	4	2
X5	1	2	3	1	1	1	0.25	0.333333	0.5	0.25	0.333333	0.5	1	1	1	0.5	0.333333	0.25	1	0.5	0.333333	0.5	0.333333	0.25	0.5	0.333333	0.25	1	1	1	1	2	3	1	0.5	0.333333	0.5	0.333333	0.25	1	2	3	1	0.5	0.333333	1	1	1	1
X6	3	4	5	2	3	4	1	1	1	1	1	1	2	3	4	1	1	1	1	2	3	1	1	1	1	1	1	2	3	4	3	4	5	1	2	3	1	1	1	3	4	5	1	2	3	2	3	4	2
X7	2	3	4	1	2	3	0.333333	0.5	1	0.333333	0.5	1	1	2	3	0.333333	0.5	1	1	1	1	1	0.5	0.333333	1	0.5	0.333333	1	2	3	2	3	4	1	1	1	1	0.5	0.333333	2	3	4	1	1	1	1	2	3	1
X8	3	4	5	2	3	4	1	1	1	1	1	1	2	3	4	1	1	1	1	2	3	1	1	1	1	1	1	2	3	4	3	4	5	1	2	3	1	1	1	3	4	5	1	2	3	2	3	4	2
X9	3	4	5	2	3	4	1	1	1	1	1	1	2	3	4	1	1	1	1	2	3	1	1	1	1	1	1	2	3	4	3	4	5	1	2	3	1	1	1	3	4	5	1	2	3	2	3	4	2
X10	1	2	3	1	1	1	0.25	0.333333	0.5	0.25	0.333333	0.5	1	1	1	0.25	0.333333	0.5	0.333333	0.5	1	0.25	0.333333	0.5	0.25	0.333333	0.5	1	1	1	1	2	3	1	0.5	0.333333	0.5	0.333333	0.25	1	2	3	1	0.5	0.333333	1	1	1	1
X11	1	1	1	0.333333	0.5	1	0.2	0.25	0.333333	0.2	0.25	0.333333	0.333333	0.5	1	0.2	0.25	0.333333	0.25	0.333333	0.5	0.2	0.25	0.333333	0.2	0.25	0.333333	0.333333	0.5	1	1	1	1	0.5	0.333333	0.25	0.333333	0.25	0.2	1	1	1	0.5	0.333333	0.25	1	0.5	0.333333	1
X12	2	3	4	1	2	3	0.333333	0.5	1	0.333333	0.5	1	1	2	3	0.333333	0.5	1	1	1	1	0.333333	0.5	1	0.333333	0.5	1	1	2	3	2	3	4	1	1	1	1	0.5	0.333333	2	3	4	1	1	1	1	2	3	1
X13	3	4	5	2	3	4	1	1	1	1	1	1	2	3	4	1	1	1	1	2	3	1	1	1	1	1	1	2	3	4	3	4	5	1	2	3	1	1	1	3	4	5	1	2	3	2	3	4	2
X14	1	1	1	0.333333	0.5	1	0.2	0.25	0.333333	0.2	0.25	0.333333	0.333333	0.5	1	0.2	0.25	0.333333	0.25	0.333333	0.5	0.2	0.25	0.333333	0.2	0.25	0.333333	0.333333	0.5	1	1	1	1	0.25	0.333333	0.5	0.2	0.25	0.333333	1	1	1	0.5	0.333333	0.25	1	0.5	0.333333	1
X15	2	3	4	1	2	3	0.333333	0.5	1	0.333333	0.5	1	1	2	3	0.333333	0.5	1	1	1	1	0.333333	0.5	1	0.333333	0.5	1	1	2	3	2	3	4	1	1	1	0.333333	0.5	1	2	3	4	1	1	1	1	2	3	1
X16	1	2	3	1	1	1	0.25	0.333333	0.5	0.25	0.333333	0.5	1	1	1	0.25	0.333333	0.5	0.333333	0.5	1	0.25	0.333333	0.5	0.25	0.333333	0.5	1	1	1	1	2	3	0.333333	0.5	1	0.25	0.333333	0.5	1	2	3	0.333333	0.5	1	1	1	1	1
X17	1	2	3	1	1	1	0.25	0.333333	0.5	0.25	0.333333	0.5	1	1	1	0.25	0.333333	0.5	0.333333	0.5	1	0.25	0.333333	0.5	0.25	0.333333	0.5	1	1	1	1	2	3	0.333333	0.5	1	0.25	0.333333	0.5	1	2	3	0.333333	0.5	1	1	1	1	1
X18	3	4	5	2	3	4	1	1	1	1	1	1	2	3	4	1	1	1	1	2	3	1	1	1	1	1	1	2	3	4	3	4	5	1	2	3	1	1	1	3	4	5	1	2	3	2	3	4	2
X19	1	2	3	1	1	1	0.25	0.333333	0.5	0.25	0.333333	0.5	1	1	1	0.25	0.333333	0.5	0.333333	0.5	1	0.25	0.333333	0.5	0.25	0.333333	0.5	1	1	1	1	2	3	0.333333	0.5	1	0.25	0.333333	0.5	1	2	3	0.333333	0.5	1	1	1	1	1
X20	3	4	5	2	3	4	1	1	1	1	1	1	2	3	4	1	1	1	1	2	3	1	1	1	1	1	1	2	3	4	3	4	5	1	2	3	1	1	1	3	4	5	1	2	3	2	3	4	2
X21	2	3	4	1	2	3	0.333333	0.5	1	0.333333	0.5	1	1	2	3	0.333333	0.5	1	1	1	1	0.333333	0.5	1	0.333333	0.5	1	1	2	3	2	3	4	1	1	1	0.333333	0.5	1	2	3	4	1	1	1	1	2	3	1
X22	1	1	1	0.333333	0.5	1	0.2	0.25	0.333333	0.2	0.25	0.333333	0.333333	0.5	1	0.2	0.25	0.333333	0.25	0.333333	0.5	0.2	0.25	0.333333	0.2	0.25	0.333333	0.333333	0.5	1	1	1	1	0.25	0.333333	0.5	0.2	0.25	0.333333	1	1	1	0.25	0.333333	0.5	0.333333	0.5	1	0.333333
X23	1	2	3	1	1	1	0.25	0.333333	0.5	0.25	0.333333	0.5	1	1	1	0.25	0.333333	0.5	0.333333	0.5	1	0.25	0.333333	0.5	0.25	0.333333	0.5	1	1	1	1	2	3	0.333333	0.5	1	0.25	0.333333	0.5	1	2	3	0.333333	0.5	1	1	1	1	1
X24	1	1	1	0.333333	0.5	1	0.2	0.25	0.333333	0.2	0.25	0.333333	0.333333	0.5	1	0.2	0.25	0.333333	0.25	0.333333	0.5	0.2	0.25	0.333333	0.2	0.25	0.333333	0.333333	0.5	1	1	1	1	0.25	0.333333	0.5	0.2	0.25	0.333333	1	1	1	0.25	0.333333	0.5	0.333333	0.5	1	0.333333
X25	1	2	3	1	1	1	0.25	0.333333	0.5	0.25	0.333333	0.5	1	1	1	0.25	0.333333	0.5	0.333333	0.5	1	0.25	0.333333	0.5	0.25	0.333333	0.5	1	1	1	1	2	3	0.333333	0.5	1	0.25	0.333333	0.5	1	2	3	0.333333	0.5	1	1	1	1	1
X26	3	4	5	2	3	4	1	1	1	1	1	1	2	3	4	1	1	1	1	2	3	1	1	1	1	1	1	2	3	4	3	4	5	1	2	3	1	1	1	3	4	5	1	2	3	2	3	4	2
X27	3	4	5	2	3	4	1	1	1	1	1	1	2	3	4	1	1	1	1	2	3	1	1	1	1	1	1	2	3	4	3	4	5	1	2	3	1	1	1	3	4	5	1	2	3	2	3	4	2
X28	1	2	3	1	1	1	0.25	0.333333	0.5	0.25	0.333333	0.5	1	1	1	0.25	0.333333	0.5	0.333333	0.5	1	0.25	0.333333	0.5	0.25	0.333333	0.5	1	1	1	1	2	3	0.333333	0.5	1	0.25	0.333333	0.5	1	2	3	0.333333	0.5	1	1	1	1	1
X29	1	1	1	0.333333	0.5	1	0.2	0.25	0.333333	0.2	0.25	0.333333	0.333333	0.5	1	0.2	0.25	0.333333	0.25	0.333333	0.5	0.2	0.25	0.333333	0.2	0.25	0.333333	0.333333	0.5	1	1	1	1	0.25	0.333333	0.5	0.2	0.25	0.333333	1	1	1	0.25	0.333333	0.5	0.333333	0.5	1	0.333333
X30	2	3	4	1	2	3	0.333333	0.5	1	0.333333	0.5	1	1	2	3	0.333333	0.5	1	1	1	1	0.333333	0.5	1	0.333333	0.5	1	1	2	3	2	3	4	1	1	1	0.333333	0.5	1	2	3	4	1	1	1	1	2	3	1
X31	1	2	3	1	1	1	0.25	0.333333	0.5	0.25	0.333333	0.5	1	1	1	0.25	0.333333	0.5	0.333333	0.5	1	0.25	0.333333	0.5	0.25	0.333333	0.5	1	1	1	1	2	3	0.333333	0.5	1	0.25	0.333333	0.5	1	2	3	0.333333	0.5	1	1	1	1	1
X32	1	1	1	0.333333	0.5	1	0.2	0.25	0.333333	0.2	0.25	0.333333	0.333333	0.5	1	0.2	0.25	0.333333	0.25	0.333333	0.5	0.2	0.25	0.333333	0.2	0.25	0.333333	0.333333	0.5	1	1	1	1	0.25	0.333333	0.5	0.2	0.25	0.333333	1	1	1	0.25	0.333333	0.5	0.333333	0.5	1	0.333333
X33	2	3	4	1	2	3	0.333333	0.5	1	0.333333	0.5	1	1	2	3	0.333333	0.5	1	1	1	1	0.333333	0.5	1	0.333333	0.5	1	1	2	3	2	3	4	1	1	1	0.333333	0.5	1	2	3	4	1	1	1	1	2	3	1
X34	2	3	4	1	2	3	0.333333	0.5	1	0.333333	0.5	1	1	2	3	0.333333	0.5	1	1	1	1	0.333333	0.5	1	0.333333	0.5	1	1	2	3	2	3	4	1	1	1	0.333333	0.5	1	2	3	4	1	1	1	1	2	3	1
X35	2	3	4	1	2	3	0.333333	0.5	1	0.333333	0.5	1	1	2	3	0.333333	0.5	1	1	1	1	0.333333	0.5	1	0.333333	0.5	1	1	2	3	2	3	4	1	1	1	0.333333	0.5	1	2	3	4	1	1	1	1	2	3	1
X36	2	3	4	1	2	3	0.333333	0.5	1	0.333333	0.5	1	1	2	3	0.333333	0.5	1	1	1	1	0.333333	0.5	1	0.333333	0.5	1	1	2	3	2	3	4	1	1	1	0.333333	0.5	1	2	3	4	1	1	1	1	2	3	1
X37	1	2	3	1	1	1	0.25	0.333333	0.5	0.25	0.333333	0.5	1	1	1	0.25	0.333333	0.5	0.333333	0.5	1	0.25	0.333333	0.5	0.25	0.333333	0.5	1	1	1	1	2	3	0.333333	0.5	1	0.25	0.333333	0.5	1	2	3	0.333333	0.5	1	1	1	1	1
X38	1	2	3	1	1	1	0.25	0.333333	0.5	0.25	0.333333	0.5	1	1	1	0.25	0.333333	0.5	0.333333	0.5	1	0.25	0.333333	0.5	0.25	0.333333	0.5	1	1	1	1	2	3	0.333333	0.5	1	0.25	0.333333	0.5	1	2	3	0.333333	0.5	1	1	1	1	1
X39	2	3	4	1	2	3	0.333333	0.5	1	0.333333	0.5	1	1	2	3	0.333333	0.5	1	1	1	1	0.333333	0.5	1	0.333333	0.5	1	1	2	3	2	3	4	1	1	1	0.333333	0.5	1	2	3	4	1	1	1	1	2	3	1
X40	2	3	4	1	2	3	0.333333	0.5	1	0.333333	0.5	1	1	2	3	0.333333	0.5	1	1	1	1	0.333333	0.5	1	0.333333	0.5	1	1	2	3	2	3	4	1	1	1	0.333333	0.5	1	2	3	4	1	1	1	1	2	3	1
X41	1	1	1	0.333333	0.5	1	0.2	0.25	0.333333	0.2	0.25	0.333333	0.333333	0.5	1	0.2	0.25	0.333333	0.25	0.333333	0.5	0.2	0.25	0.333333	0.2	0.25	0.333333	0.333333	0.5	1	1	1	1	0.25	0.333333	0.5	0.2	0.25	0.333333	1	1	1	0.25	0.333333	0.5	0.333333	0.5	1	0.333333
X42	1	1	1	0.333333	0.5	1	0.2	0.25	0.333333	0.2	0.25	0.333333	0.333333	0.5	1	0.2	0.25	0.333333	0.25	0.333333	0.5	0.2	0.25	0.333333	0.2	0.25	0.333333	0.333333	0.5	1	1	1	1	0.25	0.333333	0.5	0.2	0.25	0.333333	1	1	1	0.25	0.333333	0.5	0.333333	0.5	1	0.333333
X43	1	1	1	0.333333	0.5	1	0.2	0.25	0.333333	0.2	0.25	0.333333	0.333333	0.5	1	0.2	0.25	0.333333	0.25	0.333333	0.5	0.2	0.25	0.333333	0.2	0.25	0.333333	0.333333	0.5	1	1	1	1	0.25	0.333333	0.5	0.2	0.25	0.333333	1	1	1	0.25	0.333333	0.5	0.333333	0.5	1	0.333333
X44	2	3	4	1	2	3	0.333333	0.5	1	0.333333	0.5	1	1	2	3	0.333333	0.5	1	1	1	1	0.333333	0.5	1	0.333333	0.5	1	1	2	3	2	3	4	1	1	1	0.333333	0.5	1	2	3	4	1	1	1	1	2	3	1
X45	2	3	4	1	2	3	0.333333	0.5	1	0.333333	0.5	1	1	2	3	0.333333	0.5	1	1	1	1	0.333333	0.5	1	0.333333	0.5	1	1	2	3	2	3	4	1	1	1	0.333333	0.5	1	2	3	4	1	1	1	1	2	3	1
X46	2	3	4	1	2	3	0.333333	0.5	1	0.333333	0.5	1	1	2	3	0.333333	0.5	1	1	1	1	0.333333	0.5	1	0.333333	0.5	1	1	2	3	2	3	4	1	1	1	0.333333	0.5	1	2	3	4	1	1	1	1	2	3	1
X47	1	2	3	1	1	1	0.25	0.333333	0.5	0.25	0.333333	0.5	1	1	1	0.25	0.333333	0.5	0.333333	0.5	1	0.25	0.333333	0.5	0.25	0.333333	0.5	1	1	1	1	2	3	0.333333	0.5	1	0.25	0.333333	0.5	1	2	3	0.333333	0.5	1	1	1	1	1
X48	1	2	3	1	1	1	0.25	0.333333	0.5	0.25	0.333333	0.5	1	1	1	0.25	0.333333	0.5	0.333333	0.5	1	0.25	0.333333	0.5	0.25	0.333333	0.5	1	1	1	1	2	3	0.333333	0.5	1	0.25	0.333333	0.5	1	2	3	0.333333	0.5	1	1	1	1	1
X49	2	3	4	1	2	3	0.333333	0.5	1	0.333333	0.5	1	1	2	3	0.333333	0.5	1	1	1	1	0.333333	0.5	1	0.333333	0.5	1	1	2	3	2	3	4	1	1	1	0.333333	0.5	1	2	3	4	1	1	1	1	2	3	1
X50	2	3	4	1	2	3	0.333333	0.5	1	0.333333	0.5	1	1	2	3	0.333333	0.5	1	1	1	1	0.333333	0.5	1	0.333333	0.5	1	1	2	3	2	3	4	1	1	1	0.333333	0.5	1	2	3	4	1	1	1	1	2	3	1
X51	2	3	4	1	2	3	0.333333	0.5	1	0.333333	0.5	1	1	2	3	0.333333	0.5	1	1	1	1	0.333333	0.5	1	0.333333	0.5	1	1	2	3	2	3	4	1	1	1	0.333333	0.5	1	2	3	4	1	1	1	1	2	3	1
X52	1	2	3	1	1	1	0.25	0.333333	0.5	0.25	0.333333	0.5	1	1	1	0.25	0.333333	0.5	0.333333	0.5	1	0.25	0.333333	0.5	0.25	0.333333	0.5	1	1	1	1	2	3	0.333333	0.5	1	0.25	0.333333	0.5	1	2	3	0.333333	0.5	1	1	1	1	1
		Geometric Mean					Fuzzy Weights			Average	Normalization
	X1	0.645405	0.437927	0.339722		X1	0.00847546	0.00725731	0.00729141	0.00767473	0.00709257
	X2	0.875205	0.737433	0.66068		X2	0.0114932	0.0122207	0.0141801	0.0126313	0.0116732
	X3	1.50865	2.24815	2.91119		X3	0.0198117	0.0372563	0.0624824	0.0398501	0.0368273
	X4	1.50865	2.24815	2.91119		X4	0.0198117	0.0372563	0.0624824	0.0398501	0.0368273
	X5	0.85218	0.737433	0.678531		X5	0.0111908	0.0122207	0.0145632	0.0126582	0.0116981
	X6	1.50865	2.24815	2.91119		X6	0.0198117	0.0372563	0.0624824	0.0398501	0.0368273
	X7	1.07242	1.32038	1.54591		X7	0.014083	0.0218813	0.0331796	0.023048	0.0212997
	X8	1.50865	2.24815	2.91119		X8	0.0198117	0.0372563	0.0624824	0.0398501	0.0368273
	X9	1.50865	2.24815	2.91119		X9	0.0198117	0.0372563	0.0624824	0.0398501	0.0368273
	X10	0.801658	0.737433	0.721293		X10	0.0105274	0.0122207	0.015481	0.012743	0.0117764
	X11	0.569096	0.437927	0.385275		X11	0.00747337	0.00725731	0.0082691	0.00766659	0.00708505
	X12	1.02805	1.32038	1.61263		X12	0.0135003	0.0218813	0.0346116	0.0233311	0.0215613
	X13	1.50865	2.24815	2.91119		X13	0.0198117	0.0372563	0.0624824	0.0398501	0.0368273
	X14	0.556071	0.437927	0.3943		X14	0.00730233	0.00725731	0.00846279	0.00767414	0.00709203
	X15	1.00656	1.32038	1.64706		X15	0.0132181	0.0218813	0.0353506	0.0234834	0.0217021
	X16	0.758314	0.737433	0.762521		X16	0.00995819	0.0122207	0.0163659	0.0128483	0.0118737
	X17	0.758314	0.737433	0.762521		X17	0.00995819	0.0122207	0.0163659	0.0128483	0.0118737
	X18	1.50865	2.24815	2.91119		X18	0.0198117	0.0372563	0.0624824	0.0398501	0.0368273
	X19	0.748273	0.737433	0.772753		X19	0.00982633	0.0122207	0.0165855	0.0128775	0.0119007
	X20	1.50865	2.24815	2.91119		X20	0.0198117	0.0372563	0.0624824	0.0398501	0.0368273
	X21	0.964911	1.32038	1.71815		X21	0.0126712	0.0218813	0.0368764	0.0238096	0.0220036
	X22	0.498303	0.437927	0.440011		X22	0.00654371	0.00725731	0.00944388	0.0077483	0.00716056
	X23	0.722929	0.737433	0.799844		X23	0.00949351	0.0122207	0.0171669	0.0129604	0.0119773
	X24	0.487885	0.437927	0.449406		X24	0.00640691	0.00725731	0.00964552	0.00776992	0.00718054
	X25	0.722929	0.737433	0.799844		X25	0.00949351	0.0122207	0.0171669	0.0129604	0.0119773
	X26	1.50865	2.24815	2.91119		X26	0.0198117	0.0372563	0.0624824	0.0398501	0.0368273
	X27	1.50865	2.24815	2.91119		X27	0.0198117	0.0372563	0.0624824	0.0398501	0.0368273
	X28	0.703911	0.733365	0.821454		X28	0.00924376	0.0121533	0.0176307	0.0130093	0.0120225
	X29	0.4586	0.443804	0.478104		X29	0.00602234	0.0073547	0.0102615	0.0078795	0.00728181
	X30	0.924988	1.31013	1.7923		X30	0.012147	0.0217114	0.0384679	0.0241088	0.02228
	X31	0.689195	0.733365	0.838994		X31	0.00905052	0.0121533	0.0180072	0.0130703	0.0120789			تقيمم fuzzy ahp		تقييم الاستبيان
	X32	0.443067	0.443804	0.494865		X32	0.00581837	0.0073547	0.0106212	0.00793142	0.0073298			1		1
	X33	0.924988	1.32038	1.7923		X33	0.012147	0.0218813	0.0384679	0.0241654	0.0223324			3		2
	X34	0.924988	1.32038	1.7923		X34	0.012147	0.0218813	0.0384679	0.0241654	0.0223324			5		3
	X35	0.924988	1.32038	1.7923		X35	0.012147	0.0218813	0.0384679	0.0241654	0.0223324			7		4
	X36	0.924988	1.31013	1.7923		X36	0.012147	0.0217114	0.0384679	0.0241088	0.02228			9		5
	X37	0.633345	0.737433	0.912978		X37	0.0083171	0.0122207	0.0195951	0.0133776	0.0123629
	X38	0.633345	0.743206	0.912978		X38	0.0083171	0.0123164	0.0195951	0.0134095	0.0123924
	X39	0.924988	1.32038	1.7923		X39	0.012147	0.0218813	0.0384679	0.0241654	0.0223324
	X40	0.924988	1.3029	1.7923		X40	0.012147	0.0215916	0.0384679	0.0240688	0.0222431
	X41	0.392089	0.437927	0.559206		X41	0.00514892	0.00725731	0.0120021	0.00813612	0.00751897
	X42	0.392089	0.437927	0.559206		X42	0.00514892	0.00725731	0.0120021	0.00813612	0.00751897
	X43	0.392089	0.443804	0.559206		X43	0.00514892	0.0073547	0.0120021	0.00816859	0.00754897
	X44	0.924988	1.32038	1.7923		X44	0.012147	0.0218813	0.0384679	0.0241654	0.0223324
	X45	0.924988	1.32038	1.7923		X45	0.012147	0.0218813	0.0384679	0.0241654	0.0223324
	X46	0.924988	1.31013	1.7923		X46	0.012147	0.0217114	0.0384679	0.0241088	0.02228
	X47	0.569854	0.737433	1.0147		X47	0.00748333	0.0122207	0.0217783	0.0138275	0.0127786
	X48	0.569854	0.743206	1.0147		X48	0.00748333	0.0123164	0.0217783	0.0138593	0.0128081
	X49	0.924988	1.32038	1.7923		X49	0.012147	0.0218813	0.0384679	0.0241654	0.0223324
	X50	0.924988	1.32038	1.7923		X50	0.012147	0.0218813	0.0384679	0.0241654	0.0223324
	X51	0.924988	1.31013	1.7923		X51	0.012147	0.0217114	0.0384679	0.0241088	0.02228
	X52	0.534857	0.749004	1.08109		X52	0.00702374	0.0124125	0.0232033	0.0142132	0.0131351
	Sum	46.5922	60.3429	76.1498		Total Average				1.08208	1
	Inverse	0.0214628	0.016572	0.013132
	Arrange	0.013132	0.016572	0.0214628
[truncated: 107 more columns]

## Sheet: N (6)
	اسم الشركة	نوع الشركة	هل معتمدة ب ISO9000	تخصص الشركة	سنة التأسيس	المنصب	الدرجة العلمية الحاصل عليها	سنوات الخبرة في مجال العمل	عدد المشاريع المنفذة خلال الخمس سنوات الماضية	قيمة المشاريع المنفذة خلال الخمس سنوات الماضية (مليون جنيه مصرى)	قيمة المشروع الحالي	هل تطبق الشركة التي تعمل بها مفاهيم إدارة المشاريع ولديها نظام إدارة الجودة (QMS)	هل لديك أي علاقة بأنشطة إدارة الجودة ؟	1- طريقة تسليم المشروع أي الأجراء المحدد لإنهاء الخدمة التي يختارها العميل مثل ((Design-bid-build(DBB)/Design-build (DB)/Construction Manager at risk(CMAR)/Job order contracting /Fast track)	2- نوع العقد أي طريقة التعاقد بين الجهات المعنيه مثل (Unit price/ Lumpsum/ Cost plus fixed fee / Cost plus percentage fee/ Target cost / Other contract)	3- فئة المقاول أي درجة تصنيف المقاول طبقا لنظام تصنيف المقاولين مثل (درجة أولي - درجة ثانية - أخرى )	4- مدة المشروع أي التأخير عن الجدول الزمني المخطط لتسليم المشروع	5- موقع المشروع أي تأثير الاختيار الامثل لمكان المشروع	1- عدم متابعة العمل من قبل المشاركين في المشروع ( أي عدم قيام أطرف المشروع بمتابعه الاعمال بشكل دوري وعمل تقارير حول ما تم إنجازه )	2- عدم كفايه مواد البناء والمعدات وقطع الغيار ( أي النقص في الموارد المطلوبة وأعمال الصيانة )	3- عدم خبرة مديرين المشاريع، وفريق الإشراف في تحديد الاحتياجات ومتطلبات العمل ( أي عدم القدرة علي تحقيق التوازن بين مختلف المصالح والاحتياجات لأفراد فريق المشروع وأصحاب المصلحة )	4- عدم معرفةمدير مشروع بالتقنيات المناسبة ( أي هل تؤثر عدم معرفةمدير مشروع بالمهارات الفنية والتقنية علي تكلفة الجودة الرديئة ام معرفته بالمهارات الإدارية فقط )	5- المشاكل المتعلقة بالبيئه المحيطه للمشروع ( أي المشاكل المتعلقة بنظام البيئة مثل الهواء والماء والتربة وما إلي ذلك التي نشأت نتيجة للتدخل البشري أو سوء معاملة الأرض )	6- الخلافات والنزاعات بين المشاركين في المشروع ( أي الخلاف بين طرفي العقد بخصوص عقد المشروع او أحدي وثائقه )	7- ضعف تقنيات التخطيط والرقابة ( أي عدم تحقيق الأهداف المرسومة في ظل تحقيق الكفاءة في استخدام الموارد المتاحة )	8- عدم التنسيق بين المصممين والمقاولين ( أي عدم التنسيق بين الأطراف المشاركة لضمان التنفيذ الناجح لجميع المراحل وفقاً للأهداف المخططة )	9- عدم سرعة اتخاذ القرار بمشاركة جميع أطراف المشروع ( أي عدم القدرة علي رؤية الاختيارات المتاحة بوضوح )	10- نقص في تدريب الموارد البشرية على المهارات التي يتطلبها المشروع ( أي قله تدريب و تعزيز مهارات الموظفين لتطوير مهاراتهم وإمكانيتهم )	11- عدم التزام الإدارة بالتحسين المستمر للجودة ( أي قلة العمل علي تطوير العمليات والأنشطة المتعلقة بالالأت و المواد والأفراد وطرق الأنتاج بشكل مستمر )	12- عدم حساب تكلفة الجودة المخططة للمشروع ( أي عدم حساب التكاليف التي تتكبدها الشركة للتأكد من أن منتجاتها أو خدمتها تلبي معايير الجودة المطلوبة )	13- عدم خبرة فريق الإشراف ( أي عدم كفاءة التوجيه والإشراف علي الأعمال )	14- ترددمدير مشروع في اتخاذ القرار المالي ( أي عدم قدرةمدير مشروع في اي تغيير او تعديل علي سبيل المثال تغيير الميزانية المقدرة للمشروع )	15- التردد في اتخاذ القرار في الوقت المناسب من قبلمدير مشروع ( أي المماطلة المزمنة عند إتخاذ القرارات )	16- ضعف الإشراف ومتابعة العمل خلال ساعات العمل الإضافية ( أي ضعف تتبع ساعات نظام العمل الإضافي )	17- عدم مطابقة أهداف الجودة للمعايير والمواصفات ( أي عدم المطابقة لمتطلبات و مواصفات او خصائص معينة قادرة علي الوفاء بالمعايير والمتطلبات المتعارف عليها في المؤسسات المماثلة )	18- ضعف القيادة الفعالة لإدارة المشروع ( أي عدم القدرة علي توجيه وتحفيز الأفراد لتحقيق أهداف محددة )	19- عدم استخدام القوى العاملة الماهرة في التنفيذ ( أي تعيين عمالة بخبرات ضعيفة في أعمال التنفيذ )	20- عدم تخطيط التدفق النقدي ( أي عدم تطبيق نظام لمتابعة حركة الأموال داخل الشركة كل شهر اوخلال فترة معينة )	21- عدم وضوح الهيكل التنظيمي للعاملين بالمشروع ( أي عدم توضيح التنظيم والهيكل الإدراي للمؤسسة وتوزيع المهامات بفاعلية )	22- عدم استخدام أنظمة المشتريات المتكاملة ( أي ضعف ادارة عملية الشراء وعدم تحديد اهم احتياجات المنظمة )	23- ضعف التركيز علي عملية النفقات والمشتريات ( أي عدم متابعة الميزانية والتدفق النقدي )	24- ضعف الإنتاجية ( أي عدم إيجاد نظم وحلول جديدة لاستغلال الموارد المتاحة لتحقيق اعلي جودة في أفضل وقت وبأقل تكاليف ممكنة )	25- ضعف جودة الموارد المستخدمة ( أي عدم مطابقة الموارد للمواصفات و المعايير الفنية )	26- الفجوة بين الجدول الزمني المخطط والفعلي ( أي وجود فرق بين الوقت المخطط والوقت الفعلي المستغرق لإتمام المشروع )	27- الفجوة بين التكلفة المخططة والتكلفة الفعلية ( أي وجود فرق بين التكلفة المخططة والتكلفة الفعلية لإتمام المشروع )	28- الفجوة بين الهدف المخطط والفعلي ( أي وجود اختلاف بين الأداء الفعلي و الأداء المتوقع مستقبليأ للمؤسسة )	1- إهدار الموارد في الموقع ( أي إستخدام الموارد سواء مواد او ومعدات او عمالة بشكل غير جيد )	2- نقص الخبرة والموارد الفنية والمهنية لأداء المهمة ( أي ضعف المهارات لتقييم متطلبات المشروع وتحقيق النتايج المطلوبة )	3- عدم الوعي بالجودة لفريق المشروع ( أي عدم فهم قيمة الجودة والدقة في العمل لتقديم الخدمة بأفضل طريقة )
6	Shaker consultancy group	خاصة	نعم	استشاري	1970	مدير المشروع	دكتوراه	أكثر من 20 سنة	من 10 إلي أقل من 20	من 300 إلي أقل من 500	مليون10	نعم	لا	4	4	5	4	5	3	5	2	5	4	4	3	2	2	4	3	3	4	2	4	4	4	3	3	3	1	3	5	2	1	3	4	2	5	2	2
													6	X1	X2	X3	X4	X5	X6	X7	X8	X9	X10	X11	X12	X13	X14	X15	X16	X17	X18	X19	X20	X21	X22	X23	X24	X25	X26	X27	X28	X29	X30	X31	X32	X33	X34	X35	X36
														4	4	5	4	5	3	5	2	5	4	4	3	2	2	4	3	3	4	2	4	4	4	3	3	3	1	3	5	2	1	3	4	2	5	2	2
	X1			X2			X3			X4			X5			X6			X7			X8			X9			X10			X11			X12			X13			X14			X15			X16			X17
X1	1	1	1	1	1	1	1	0.5	0.333333	1	1	1	1	0.5	0.333333	1	2	3	1	0.5	0.333333	2	3	4	1	0.5	0.333333	1	1	1	1	1	1	1	2	3	2	3	4	2	3	4	1	1	1	1	2	3	1
X2	1	1	1	1	1	1	1	0.5	0.333333	1	1	1	1	0.5	0.333333	1	2	3	1	0.5	0.333333	2	3	4	1	0.5	0.333333	1	1	1	1	1	1	1	2	3	2	3	4	2	3	4	1	1	1	1	2	3	1
X3	1	2	3	1	2	3	1	1	1	1	2	3	1	1	1	2	3	4	1	1	1	3	4	5	1	1	1	1	2	3	1	2	3	2	3	4	3	4	5	3	4	5	1	2	3	2	3	4	2
X4	1	1	1	1	1	1	0.333333	0.5	1	1	1	1	1	0.5	0.333333	1	2	3	1	0.5	0.333333	2	3	4	1	0.5	0.333333	1	1	1	1	1	1	1	2	3	2	3	4	2	3	4	1	1	1	1	2	3	1
X5	1	2	3	1	2	3	1	1	1	1	2	3	1	1	1	2	3	4	1	1	1	3	4	5	1	1	1	1	2	3	1	2	3	2	3	4	3	4	5	3	4	5	1	2	3	2	3	4	2
X6	0.333333	0.5	1	0.333333	0.5	1	0.25	0.333333	0.5	0.333333	0.5	1	0.25	0.333333	0.5	1	1	1	0.5	0.333333	0.25	1	2	3	0.5	0.333333	0.25	1	0.5	0.333333	1	0.5	0.333333	1	1	1	1	2	3	1	2	3	1	0.5	0.333333	1	1	1	1
X7	1	2	3	1	2	3	1	1	1	1	2	3	1	1	1	2	3	4	1	1	1	3	4	5	1	1	1	1	2	3	1	2	3	2	3	4	3	4	5	3	4	5	1	2	3	2	3	4	2
X8	0.25	0.333333	0.5	0.25	0.333333	0.5	0.2	0.25	0.333333	0.25	0.333333	0.5	0.2	0.25	0.333333	0.333333	0.5	1	0.2	0.25	0.333333	1	1	1	0.333333	0.25	0.2	0.5	0.333333	0.25	0.5	0.333333	0.25	1	0.5	0.333333	1	1	1	1	1	1	0.5	0.333333	0.25	1	0.5	0.333333	1
X9	1	2	3	1	2	3	1	1	1	1	2	3	1	1	1	2	3	4	1	1	1	3	4	5	1	1	1	1	2	3	1	2	3	2	3	4	3	4	5	3	4	5	1	2	3	2	3	4	2
X10	1	1	1	1	1	1	0.333333	0.5	1	1	1	1	0.333333	0.5	1	1	2	3	0.333333	0.5	1	2	3	4	0.333333	0.5	1	1	1	1	1	1	1	1	2	3	2	3	4	2	3	4	1	1	1	1	2	3	1
X11	1	1	1	1	1	1	0.333333	0.5	1	1	1	1	0.333333	0.5	1	1	2	3	0.333333	0.5	1	2	3	4	0.333333	0.5	1	1	1	1	1	1	1	1	2	3	2	3	4	2	3	4	1	1	1	1	2	3	1
X12	0.333333	0.5	1	0.333333	0.5	1	0.25	0.333333	0.5	0.333333	0.5	1	0.25	0.333333	0.5	1	1	1	0.25	0.333333	0.5	1	2	3	0.25	0.333333	0.5	0.333333	0.5	1	0.333333	0.5	1	1	1	1	1	2	3	1	2	3	1	0.5	0.333333	1	1	1	1
X13	0.25	0.333333	0.5	0.25	0.333333	0.5	0.2	0.25	0.333333	0.25	0.333333	0.5	0.2	0.25	0.333333	0.333333	0.5	1	0.2	0.25	0.333333	1	1	1	0.2	0.25	0.333333	0.25	0.333333	0.5	0.25	0.333333	0.5	0.333333	0.5	1	1	1	1	1	1	1	0.5	0.333333	0.25	1	0.5	0.333333	1
X14	0.25	0.333333	0.5	0.25	0.333333	0.5	0.2	0.25	0.333333	0.25	0.333333	0.5	0.2	0.25	0.333333	0.333333	0.5	1	0.2	0.25	0.333333	1	1	1	0.2	0.25	0.333333	0.25	0.333333	0.5	0.25	0.333333	0.5	0.333333	0.5	1	1	1	1	1	1	1	0.5	0.333333	0.25	1	0.5	0.333333	1
X15	1	1	1	1	1	1	0.333333	0.5	1	1	1	1	0.333333	0.5	1	1	2	3	0.333333	0.5	1	2	3	4	0.333333	0.5	1	1	1	1	1	1	1	1	2	3	2	3	4	2	3	4	1	1	1	1	2	3	1
X16	0.333333	0.5	1	0.333333	0.5	1	0.25	0.333333	0.5	0.333333	0.5	1	0.25	0.333333	0.5	1	1	1	0.25	0.333333	0.5	1	2	3	0.25	0.333333	0.5	0.333333	0.5	1	0.333333	0.5	1	1	1	1	1	2	3	1	2	3	0.333333	0.5	1	1	1	1	1
X17	0.333333	0.5	1	0.333333	0.5	1	0.25	0.333333	0.5	0.333333	0.5	1	0.25	0.333333	0.5	1	1	1	0.25	0.333333	0.5	1	2	3	0.25	0.333333	0.5	0.333333	0.5	1	0.333333	0.5	1	1	1	1	1	2	3	1	2	3	0.333333	0.5	1	1	1	1	1
X18	1	1	1	1	1	1	0.333333	0.5	1	1	1	1	0.333333	0.5	1	1	2	3	0.333333	0.5	1	2	3	4	0.333333	0.5	1	1	1	1	1	1	1	1	2	3	2	3	4	2	3	4	1	1	1	1	2	3	1
X19	0.25	0.333333	0.5	0.25	0.333333	0.5	0.2	0.25	0.333333	0.25	0.333333	0.5	0.2	0.25	0.333333	0.333333	0.5	1	0.2	0.25	0.333333	1	1	1	0.2	0.25	0.333333	0.25	0.333333	0.5	0.25	0.333333	0.5	0.333333	0.5	1	1	1	1	1	1	1	0.25	0.333333	0.5	0.333333	0.5	1	0.333333
X20	1	1	1	1	1	1	0.333333	0.5	1	1	1	1	0.333333	0.5	1	1	2	3	0.333333	0.5	1	2	3	4	0.333333	0.5	1	1	1	1	1	1	1	1	2	3	2	3	4	2	3	4	1	1	1	1	2	3	1
X21	1	1	1	1	1	1	0.333333	0.5	1	1	1	1	0.333333	0.5	1	1	2	3	0.333333	0.5	1	2	3	4	0.333333	0.5	1	1	1	1	1	1	1	1	2	3	2	3	4	2	3	4	1	1	1	1	2	3	1
X22	1	1	1	1	1	1	0.333333	0.5	1	1	1	1	0.333333	0.5	1	1	2	3	0.333333	0.5	1	2	3	4	0.333333	0.5	1	1	1	1	1	1	1	1	2	3	2	3	4	2	3	4	1	1	1	1	2	3	1
X23	0.333333	0.5	1	0.333333	0.5	1	0.25	0.333333	0.5	0.333333	0.5	1	0.25	0.333333	0.5	1	1	1	0.25	0.333333	0.5	1	2	3	0.25	0.333333	0.5	0.333333	0.5	1	0.333333	0.5	1	1	1	1	1	2	3	1	2	3	0.333333	0.5	1	1	1	1	1
X24	0.333333	0.5	1	0.333333	0.5	1	0.25	0.333333	0.5	0.333333	0.5	1	0.25	0.333333	0.5	1	1	1	0.25	0.333333	0.5	1	2	3	0.25	0.333333	0.5	0.333333	0.5	1	0.333333	0.5	1	1	1	1	1	2	3	1	2	3	0.333333	0.5	1	1	1	1	1
X25	0.333333	0.5	1	0.333333	0.5	1	0.25	0.333333	0.5	0.333333	0.5	1	0.25	0.333333	0.5	1	1	1	0.25	0.333333	0.5	1	2	3	0.25	0.333333	0.5	0.333333	0.5	1	0.333333	0.5	1	1	1	1	1	2	3	1	2	3	0.333333	0.5	1	1	1	1	1
X26	0.2	0.25	0.333333	0.2	0.25	0.333333	0.166667	0.2	0.25	0.2	0.25	0.333333	0.166667	0.2	0.25	0.25	0.333333	0.5	0.166667	0.2	0.25	0.333333	0.5	1	0.166667	0.2	0.25	0.2	0.25	0.333333	0.2	0.25	0.333333	0.25	0.333333	0.5	0.333333	0.5	1	0.333333	0.5	1	0.2	0.25	0.333333	0.25	0.333333	0.5	0.25
X27	0.333333	0.5	1	0.333333	0.5	1	0.25	0.333333	0.5	0.333333	0.5	1	0.25	0.333333	0.5	1	1	1	0.25	0.333333	0.5	1	2	3	0.25	0.333333	0.5	0.333333	0.5	1	0.333333	0.5	1	1	1	1	1	2	3	1	2	3	0.333333	0.5	1	1	1	1	1
X28	1	2	3	1	2	3	1	1	1	1	2	3	1	1	1	2	3	4	1	1	1	3	4	5	1	1	1	1	2	3	1	2	3	2	3	4	3	4	5	3	4	5	1	2	3	2	3	4	2
X29	0.25	0.333333	0.5	0.25	0.333333	0.5	0.2	0.25	0.333333	0.25	0.333333	0.5	0.2	0.25	0.333333	0.333333	0.5	1	0.2	0.25	0.333333	1	1	1	0.2	0.25	0.333333	0.25	0.333333	0.5	0.25	0.333333	0.5	0.333333	0.5	1	1	1	1	1	1	1	0.25	0.333333	0.5	0.333333	0.5	1	0.333333
X30	0.2	0.25	0.333333	0.2	0.25	0.333333	0.166667	0.2	0.25	0.2	0.25	0.333333	0.166667	0.2	0.25	0.25	0.333333	0.5	0.166667	0.2	0.25	0.333333	0.5	1	0.166667	0.2	0.25	0.2	0.25	0.333333	0.2	0.25	0.333333	0.25	0.333333	0.5	0.333333	0.5	1	0.333333	0.5	1	0.2	0.25	0.333333	0.25	0.333333	0.5	0.25
X31	0.333333	0.5	1	0.333333	0.5	1	0.25	0.333333	0.5	0.333333	0.5	1	0.25	0.333333	0.5	1	1	1	0.25	0.333333	0.5	1	2	3	0.25	0.333333	0.5	0.333333	0.5	1	0.333333	0.5	1	1	1	1	1	2	3	1	2	3	0.333333	0.5	1	1	1	1	1
X32	1	1	1	1	1	1	0.333333	0.5	1	1	1	1	0.333333	0.5	1	1	2	3	0.333333	0.5	1	2	3	4	0.333333	0.5	1	1	1	1	1	1	1	1	2	3	2	3	4	2	3	4	1	1	1	1	2	3	1
X33	0.25	0.333333	0.5	0.25	0.333333	0.5	0.2	0.25	0.333333	0.25	0.333333	0.5	0.2	0.25	0.333333	0.333333	0.5	1	0.2	0.25	0.333333	1	1	1	0.2	0.25	0.333333	0.25	0.333333	0.5	0.25	0.333333	0.5	0.333333	0.5	1	1	1	1	1	1	1	0.25	0.333333	0.5	0.333333	0.5	1	0.333333
X34	1	2	3	1	2	3	1	1	1	1	2	3	1	1	1	2	3	4	1	1	1	3	4	5	1	1	1	1	2	3	1	2	3	2	3	4	3	4	5	3	4	5	1	2	3	2	3	4	2
X35	0.25	0.333333	0.5	0.25	0.333333	0.5	0.2	0.25	0.333333	0.25	0.333333	0.5	0.2	0.25	0.333333	0.333333	0.5	1	0.2	0.25	0.333333	1	1	1	0.2	0.25	0.333333	0.25	0.333333	0.5	0.25	0.333333	0.5	0.333333	0.5	1	1	1	1	1	1	1	0.25	0.333333	0.5	0.333333	0.5	1	0.333333
X36	0.25	0.333333	0.5	0.25	0.333333	0.5	0.2	0.25	0.333333	0.25	0.333333	0.5	0.2	0.25	0.333333	0.333333	0.5	1	0.2	0.25	0.333333	1	1	1	0.2	0.25	0.333333	0.25	0.333333	0.5	0.25	0.333333	0.5	0.333333	0.5	1	1	1	1	1	1	1	0.25	0.333333	0.5	0.333333	0.5	1	0.333333
X37	0.25	0.333333	0.5	0.25	0.333333	0.5	0.2	0.25	0.333333	0.25	0.333333	0.5	0.2	0.25	0.333333	0.333333	0.5	1	0.2	0.25	0.333333	1	1	1	0.2	0.25	0.333333	0.25	0.333333	0.5	0.25	0.333333	0.5	0.333333	0.5	1	1	1	1	1	1	1	0.25	0.333333	0.5	0.333333	0.5	1	0.333333
X38	0.25	0.333333	0.5	0.25	0.333333	0.5	0.2	0.25	0.333333	0.25	0.333333	0.5	0.2	0.25	0.333333	0.333333	0.5	1	0.2	0.25	0.333333	1	1	1	0.2	0.25	0.333333	0.25	0.333333	0.5	0.25	0.333333	0.5	0.333333	0.5	1	1	1	1	1	1	1	0.25	0.333333	0.5	0.333333	0.5	1	0.333333
X39	0.25	0.333333	0.5	0.25	0.333333	0.5	0.2	0.25	0.333333	0.25	0.333333	0.5	0.2	0.25	0.333333	0.333333	0.5	1	0.2	0.25	0.333333	1	1	1	0.2	0.25	0.333333	0.25	0.333333	0.5	0.25	0.333333	0.5	0.333333	0.5	1	1	1	1	1	1	1	0.25	0.333333	0.5	0.333333	0.5	1	0.333333
X40	0.25	0.333333	0.5	0.25	0.333333	0.5	0.2	0.25	0.333333	0.25	0.333333	0.5	0.2	0.25	0.333333	0.333333	0.5	1	0.2	0.25	0.333333	1	1	1	0.2	0.25	0.333333	0.25	0.333333	0.5	0.25	0.333333	0.5	0.333333	0.5	1	1	1	1	1	1	1	0.25	0.333333	0.5	0.333333	0.5	1	0.333333
X41	0.25	0.333333	0.5	0.25	0.333333	0.5	0.2	0.25	0.333333	0.25	0.333333	0.5	0.2	0.25	0.333333	0.333333	0.5	1	0.2	0.25	0.333333	1	1	1	0.2	0.25	0.333333	0.25	0.333333	0.5	0.25	0.333333	0.5	0.333333	0.5	1	1	1	1	1	1	1	0.25	0.333333	0.5	0.333333	0.5	1	0.333333
X42	0.2	0.25	0.333333	0.2	0.25	0.333333	0.166667	0.2	0.25	0.2	0.25	0.333333	0.166667	0.2	0.25	0.25	0.333333	0.5	0.166667	0.2	0.25	0.333333	0.5	1	0.166667	0.2	0.25	0.2	0.25	0.333333	0.2	0.25	0.333333	0.25	0.333333	0.5	0.333333	0.5	1	0.333333	0.5	1	0.2	0.25	0.333333	0.25	0.333333	0.5	0.25
X43	0.2	0.25	0.333333	0.2	0.25	0.333333	0.166667	0.2	0.25	0.2	0.25	0.333333	0.166667	0.2	0.25	0.25	0.333333	0.5	0.166667	0.2	0.25	0.333333	0.5	1	0.166667	0.2	0.25	0.2	0.25	0.333333	0.2	0.25	0.333333	0.25	0.333333	0.5	0.333333	0.5	1	0.333333	0.5	1	0.2	0.25	0.333333	0.25	0.333333	0.5	0.25
X44	0.2	0.25	0.333333	0.2	0.25	0.333333	0.166667	0.2	0.25	0.2	0.25	0.333333	0.166667	0.2	0.25	0.25	0.333333	0.5	0.166667	0.2	0.25	0.333333	0.5	1	0.166667	0.2	0.25	0.2	0.25	0.333333	0.2	0.25	0.333333	0.25	0.333333	0.5	0.333333	0.5	1	0.333333	0.5	1	0.2	0.25	0.333333	0.25	0.333333	0.5	0.25
X45	0.25	0.333333	0.5	0.25	0.333333	0.5	0.2	0.25	0.333333	0.25	0.333333	0.5	0.2	0.25	0.333333	0.333333	0.5	1	0.2	0.25	0.333333	1	1	1	0.2	0.25	0.333333	0.25	0.333333	0.5	0.25	0.333333	0.5	0.333333	0.5	1	1	1	1	1	1	1	0.25	0.333333	0.5	0.333333	0.5	1	0.333333
X46	0.25	0.333333	0.5	0.25	0.333333	0.5	0.2	0.25	0.333333	0.25	0.333333	0.5	0.2	0.25	0.333333	0.333333	0.5	1	0.2	0.25	0.333333	1	1	1	0.2	0.25	0.333333	0.25	0.333333	0.5	0.25	0.333333	0.5	0.333333	0.5	1	1	1	1	1	1	1	0.25	0.333333	0.5	0.333333	0.5	1	0.333333
X47	0.2	0.25	0.333333	0.2	0.25	0.333333	0.166667	0.2	0.25	0.2	0.25	0.333333	0.166667	0.2	0.25	0.25	0.333333	0.5	0.166667	0.2	0.25	0.333333	0.5	1	0.166667	0.2	0.25	0.2	0.25	0.333333	0.2	0.25	0.333333	0.25	0.333333	0.5	0.333333	0.5	1	0.333333	0.5	1	0.2	0.25	0.333333	0.25	0.333333	0.5	0.25
X48	0.2	0.25	0.333333	0.2	0.25	0.333333	0.166667	0.2	0.25	0.2	0.25	0.333333	0.166667	0.2	0.25	0.25	0.333333	0.5	0.166667	0.2	0.25	0.333333	0.5	1	0.166667	0.2	0.25	0.2	0.25	0.333333	0.2	0.25	0.333333	0.25	0.333333	0.5	0.333333	0.5	1	0.333333	0.5	1	0.2	0.25	0.333333	0.25	0.333333	0.5	0.25
X49	0.2	0.25	0.333333	0.2	0.25	0.333333	0.166667	0.2	0.25	0.2	0.25	0.333333	0.166667	0.2	0.25	0.25	0.333333	0.5	0.166667	0.2	0.25	0.333333	0.5	1	0.166667	0.2	0.25	0.2	0.25	0.333333	0.2	0.25	0.333333	0.25	0.333333	0.5	0.333333	0.5	1	0.333333	0.5	1	0.2	0.25	0.333333	0.25	0.333333	0.5	0.25
X50	0.2	0.25	0.333333	0.2	0.25	0.333333	0.166667	0.2	0.25	0.2	0.25	0.333333	0.166667	0.2	0.25	0.25	0.333333	0.5	0.166667	0.2	0.25	0.333333	0.5	1	0.166667	0.2	0.25	0.2	0.25	0.333333	0.2	0.25	0.333333	0.25	0.333333	0.5	0.333333	0.5	1	0.333333	0.5	1	0.2	0.25	0.333333	0.25	0.333333	0.5	0.25
X51	0.2	0.25	0.333333	0.2	0.25	0.333333	0.166667	0.2	0.25	0.2	0.25	0.333333	0.166667	0.2	0.25	0.25	0.333333	0.5	0.166667	0.2	0.25	0.333333	0.5	1	0.166667	0.2	0.25	0.2	0.25	0.333333	0.2	0.25	0.333333	0.25	0.333333	0.5	0.333333	0.5	1	0.333333	0.5	1	0.2	0.25	0.333333	0.25	0.333333	0.5	0.25
X52	0.2	0.25	0.333333	0.2	0.25	0.333333	0.166667	0.2	0.25	0.2	0.25	0.333333	0.166667	0.2	0.25	0.25	0.333333	0.5	0.166667	0.2	0.25	0.333333	0.5	1	0.166667	0.2	0.25	0.2	0.25	0.333333	0.2	0.25	0.333333	0.25	0.333333	0.5	0.333333	0.5	1	0.333333	0.5	1	0.2	0.25	0.333333	0.25	0.333333	0.5	0.25
		Geometric Mean					Fuzzy Weights			Average	Normalization
	X1	1.54087	1.91583	2.23386		X1	0.0187266	0.0298735	0.0462714	0.0316239	0.0288268
	X2	1.54087	1.91583	2.23386		X2	0.0187266	0.0298735	0.0462714	0.0316239	0.0288268
	X3	2.07535	2.93622	3.72707		X3	0.0252224	0.0457844	0.0772011	0.0494026	0.045033
	X4	1.50865	1.91583	2.28156		X4	0.0183351	0.0298735	0.0472594	0.0318227	0.029008
	X5	2.07535	2.93622	3.72707		X5	0.0252224	0.0457844	0.0772011	0.0494026	0.045033
	X6	0.976879	1.17228	1.36049		X6	0.0118723	0.0182794	0.0281808	0.0194442	0.0177244
	X7	2.07535	2.93622	3.72707		X7	0.0252224	0.0457844	0.0772011	0.0494026	0.045033
	X8	0.694907	0.693713	0.707429		X8	0.00844542	0.0108171	0.0146534	0.0113053	0.0103054
	X9	2.07535	2.93622	3.72707		X9	0.0252224	0.0457844	0.0772011	0.0494026	0.045033
	X10	1.416	1.91583	2.43085		X10	0.0172091	0.0298735	0.0503517	0.0324781	0.0296055
	X11	1.416	1.91583	2.43085		X11	0.0172091	0.0298735	0.0503517	0.0324781	0.0296055
	X12	0.911826	1.17228	1.45756		X12	0.0110817	0.0182794	0.0301913	0.0198508	0.018095
	X13	0.656005	0.693713	0.749381		X13	0.00797263	0.0108171	0.0155224	0.0114374	0.0104258
	X14	0.656005	0.693713	0.749381		X14	0.00797263	0.0108171	0.0155224	0.0114374	0.0104258
	X15	1.416	1.91583	2.43085		X15	0.0172091	0.0298735	0.0503517	0.0324781	0.0296055
	X16	0.892764	1.17228	1.48868		X16	0.01085	0.0182794	0.0308359	0.0199885	0.0182205
	X17	0.892764	1.17228	1.48868		X17	0.01085	0.0182794	0.0308359	0.0199885	0.0182205
	X18	1.416	1.91583	2.43085		X18	0.0172091	0.0298735	0.0503517	0.0324781	0.0296055
	X19	0.612319	0.693713	0.802845		X19	0.00744171	0.0108171	0.0166298	0.0116295	0.0106009
	X20	1.416	1.91583	2.43085		X20	0.0172091	0.0298735	0.0503517	0.0324781	0.0296055
	X21	1.416	1.91583	2.43085		X21	0.0172091	0.0298735	0.0503517	0.0324781	0.0296055
	X22	1.416	1.91583	2.43085		X22	0.0172091	0.0298735	0.0503517	0.0324781	0.0296055
	X23	0.820418	1.17228	1.61995		X23	0.00997079	0.0182794	0.0335551	0.0206018	0.0187796
	X24	0.820418	1.17228	1.61995		X24	0.00997079	0.0182794	0.0335551	0.0206018	0.0187796
	X25	0.820418	1.17228	1.61995		X25	0.00997079	0.0182794	0.0335551	0.0206018	0.0187796
	X26	0.440623	0.41935	0.450769		X26	0.00535503	0.00653892	0.00933707	0.007077	0.00645105
	X27	0.820418	1.17228	1.61995		X27	0.00997079	0.0182794	0.0335551	0.0206018	0.0187796
	X28	2.07535	2.88493	3.72707		X28	0.0252224	0.0449847	0.0772011	0.0491361	0.0447901
	X29	0.535356	0.684528	0.918263		X29	0.00650635	0.0106738	0.0190206	0.0120669	0.0109996
	X30	0.422393	0.428304	0.470224		X30	0.00513347	0.00667854	0.00974005	0.00718402	0.0065486
	X31	0.809554	1.17879	1.64169		X31	0.00983876	0.0183808	0.0340054	0.0207417	0.0189071			تقيمم fuzzy ahp		تقييم الاستبيان
	X32	1.3864	1.89046	2.48275		X32	0.0168493	0.029478	0.0514268	0.0325847	0.0297026			1		1
	X33	0.517224	0.706046	0.950454		X33	0.00628598	0.0110094	0.0196874	0.0123276	0.0112372			3		2
	X34	2.07535	2.88493	3.72707		X34	0.0252224	0.0449847	0.0772011	0.0491361	0.0447901			5		3
	X35	0.512168	0.693713	0.959837		X35	0.00622453	0.0108171	0.0198817	0.0123078	0.0112192			7		4
	X36	0.512168	0.693713	0.959837		X36	0.00622453	0.0108171	0.0198817	0.0123078	0.0112192			9		5
	X37	0.512168	0.693713	0.959837		X37	0.00622453	0.0108171	0.0198817	0.0123078	0.0112192
	X38	0.512168	0.693713	0.959837		X38	0.00622453	0.0108171	0.0198817	0.0123078	0.0112192
	X39	0.512168	0.693713	0.959837		X39	0.00622453	0.0108171	0.0198817	0.0123078	0.0112192
	X40	0.512168	0.693713	0.959837		X40	0.00622453	0.0108171	0.0198817	0.0123078	0.0112192
	X41	0.512168	0.684528	0.959837		X41	0.00622453	0.0106738	0.0198817	0.01226	0.0111756
	X42	0.345837	0.41935	0.574315		X42	0.00420306	0.00653892	0.0118961	0.00754604	0.00687861
	X43	0.345837	0.41935	0.574315		X43	0.00420306	0.00653892	0.0118961	0.00754604	0.00687861
	X44	0.345837	0.424977	0.574315		X44	0.00420306	0.00662666	0.0118961	0.00757529	0.00690527
	X45	0.512168	0.693713	0.959837		X45	0.00622453	0.0108171	0.0198817	0.0123078	0.0112192
	X46	0.512168	0.684528	0.959837		X46	0.00622453	0.0106738	0.0198817	0.01226	0.0111756
	X47	0.331528	0.41935	0.599102		X47	0.00402916	0.00653892	0.0124096	0.00765922	0.00698177
	X48	0.331528	0.41935	0.599102		X48	0.00402916	0.00653892	0.0124096	0.00765922	0.00698177
	X49	0.331528	0.41935	0.599102		X49	0.00402916	0.00653892	0.0124096	0.00765922	0.00698177
	X50	0.331528	0.41935	0.599102		X50	0.00402916	0.00653892	0.0124096	0.00765922	0.00698177
	X51	0.331528	0.41935	0.599102		X51	0.00402916	0.00653892	0.0124096	0.00765922	0.00698177
	X52	0.331528	0.412265	0.599102		X52	0.00402916	0.00642844	0.0124096	0.00762239	0.00694821
	Sum	48.2774	64.1314	82.2821		Total Average				1.09703	1
	Inverse	0.0207136	0.015593	0.0121533
	Arrange	0.0121533	0.015593	0.0207136
[truncated: 107 more columns]

## Sheet: N (7)
	اسم الشركة	نوع الشركة	هل معتمدة ب ISO9000	تخصص الشركة	سنة التأسيس	المنصب	الدرجة العلمية الحاصل عليها	سنوات الخبرة في مجال العمل	عدد المشاريع المنفذة خلال الخمس سنوات الماضية	قيمة المشاريع المنفذة خلال الخمس سنوات الماضية (مليون جنيه مصرى)	قيمة المشروع الحالي	هل تطبق الشركة التي تعمل بها مفاهيم إدارة المشاريع ولديها نظام إدارة الجودة (QMS)	هل لديك أي علاقة بأنشطة إدارة الجودة ؟	1- طريقة تسليم المشروع أي الأجراء المحدد لإنهاء الخدمة التي يختارها العميل مثل ((Design-bid-build(DBB)/Design-build (DB)/Construction Manager at risk(CMAR)/Job order contracting /Fast track)	2- نوع العقد أي طريقة التعاقد بين الجهات المعنيه مثل (Unit price/ Lumpsum/ Cost plus fixed fee / Cost plus percentage fee/ Target cost / Other contract)	3- فئة المقاول أي درجة تصنيف المقاول طبقا لنظام تصنيف المقاولين مثل (درجة أولي - درجة ثانية - أخرى )	4- مدة المشروع أي التأخير عن الجدول الزمني المخطط لتسليم المشروع	5- موقع المشروع أي تأثير الاختيار الامثل لمكان المشروع	1- عدم متابعة العمل من قبل المشاركين في المشروع ( أي عدم قيام أطرف المشروع بمتابعه الاعمال بشكل دوري وعمل تقارير حول ما تم إنجازه )	2- عدم كفايه مواد البناء والمعدات وقطع الغيار ( أي النقص في الموارد المطلوبة وأعمال الصيانة )	3- عدم خبرة مديرين المشاريع، وفريق الإشراف في تحديد الاحتياجات ومتطلبات العمل ( أي عدم القدرة علي تحقيق التوازن بين مختلف المصالح والاحتياجات لأفراد فريق المشروع وأصحاب المصلحة )	4- عدم معرفةمدير مشروع بالتقنيات المناسبة ( أي هل تؤثر عدم معرفةمدير مشروع بالمهارات الفنية والتقنية علي تكلفة الجودة الرديئة ام معرفته بالمهارات الإدارية فقط )	5- المشاكل المتعلقة بالبيئه المحيطه للمشروع ( أي المشاكل المتعلقة بنظام البيئة مثل الهواء والماء والتربة وما إلي ذلك التي نشأت نتيجة للتدخل البشري أو سوء معاملة الأرض )	6- الخلافات والنزاعات بين المشاركين في المشروع ( أي الخلاف بين طرفي العقد بخصوص عقد المشروع او أحدي وثائقه )	7- ضعف تقنيات التخطيط والرقابة ( أي عدم تحقيق الأهداف المرسومة في ظل تحقيق الكفاءة في استخدام الموارد المتاحة )	8- عدم التنسيق بين المصممين والمقاولين ( أي عدم التنسيق بين الأطراف المشاركة لضمان التنفيذ الناجح لجميع المراحل وفقاً للأهداف المخططة )	9- عدم سرعة اتخاذ القرار بمشاركة جميع أطراف المشروع ( أي عدم القدرة علي رؤية الاختيارات المتاحة بوضوح )	10- نقص في تدريب الموارد البشرية على المهارات التي يتطلبها المشروع ( أي قله تدريب و تعزيز مهارات الموظفين لتطوير مهاراتهم وإمكانيتهم )	11- عدم التزام الإدارة بالتحسين المستمر للجودة ( أي قلة العمل علي تطوير العمليات والأنشطة المتعلقة بالالأت و المواد والأفراد وطرق الأنتاج بشكل مستمر )	12- عدم حساب تكلفة الجودة المخططة للمشروع ( أي عدم حساب التكاليف التي تتكبدها الشركة للتأكد من أن منتجاتها أو خدمتها تلبي معايير الجودة المطلوبة )	13- عدم خبرة فريق الإشراف ( أي عدم كفاءة التوجيه والإشراف علي الأعمال )	14- ترددمدير مشروع في اتخاذ القرار المالي ( أي عدم قدرةمدير مشروع في اي تغيير او تعديل علي سبيل المثال تغيير الميزانية المقدرة للمشروع )	15- التردد في اتخاذ القرار في الوقت المناسب من قبلمدير مشروع ( أي المماطلة المزمنة عند إتخاذ القرارات )	16- ضعف الإشراف ومتابعة العمل خلال ساعات العمل الإضافية ( أي ضعف تتبع ساعات نظام العمل الإضافي )	17- عدم مطابقة أهداف الجودة للمعايير والمواصفات ( أي عدم المطابقة لمتطلبات و مواصفات او خصائص معينة قادرة علي الوفاء بالمعايير والمتطلبات المتعارف عليها في المؤسسات المماثلة )	18- ضعف القيادة الفعالة لإدارة المشروع ( أي عدم القدرة علي توجيه وتحفيز الأفراد لتحقيق أهداف محددة )	19- عدم استخدام القوى العاملة الماهرة في التنفيذ ( أي تعيين عمالة بخبرات ضعيفة في أعمال التنفيذ )	20- عدم تخطيط التدفق النقدي ( أي عدم تطبيق نظام لمتابعة حركة الأموال داخل الشركة كل شهر اوخلال فترة معينة )	21- عدم وضوح الهيكل التنظيمي للعاملين بالمشروع ( أي عدم توضيح التنظيم والهيكل الإدراي للمؤسسة وتوزيع المهامات بفاعلية )	22- عدم استخدام أنظمة المشتريات المتكاملة ( أي ضعف ادارة عملية الشراء وعدم تحديد اهم احتياجات المنظمة )	23- ضعف التركيز علي عملية النفقات والمشتريات ( أي عدم متابعة الميزانية والتدفق النقدي )	24- ضعف الإنتاجية ( أي عدم إيجاد نظم وحلول جديدة لاستغلال الموارد المتاحة لتحقيق اعلي جودة في أفضل وقت وبأقل تكاليف ممكنة )	25- ضعف جودة الموارد المستخدمة ( أي عدم مطابقة الموارد للمواصفات و المعايير الفنية )	26- الفجوة بين الجدول الزمني المخطط والفعلي ( أي وجود فرق بين الوقت المخطط والوقت الفعلي المستغرق لإتمام المشروع )	27- الفجوة بين التكلفة المخططة والتكلفة الفعلية ( أي وجود فرق بين التكلفة المخططة والتكلفة الفعلية لإتمام المشروع )	28- الفجوة بين الهدف المخطط والفعلي ( أي وجود اختلاف بين الأداء الفعلي و الأداء المتوقع مستقبليأ للمؤسسة )	1- إهدار الموارد في الموقع ( أي إستخدام الموارد سواء مواد او ومعدات او عمالة بشكل غير جيد )	2- نقص الخبرة والموارد الفنية والمهنية لأداء المهمة ( أي ضعف المهارات لتقييم متطلبات المشروع وتحقيق النتايج المطلوبة )	3- عدم الوعي بالجودة لفريق المشروع ( أي عدم فهم قيمة الجودة والدقة في العمل لتقديم الخدمة بأفضل طريقة )
7	شركه انجاز	خاصة	لا	مقاول	2018	مدير المشروع	بكالوريوس	من 5 إلي 10 سنوات	من 5 إلي أقل من 10	من 50 إلي أقل من 100	مليون 60	لا	نعم	2	3	5	5	3	5	4	5	5	3	2	4	5	2	4	3	3	5	3	5	4	2	3	2	3	5	1	1	4	5	2	4	2	4	5	4
													7	X1	X2	X3	X4	X5	X6	X7	X8	X9	X10	X11	X12	X13	X14	X15	X16	X17	X18	X19	X20	X21	X22	X23	X24	X25	X26	X27	X28	X29	X30	X31	X32	X33	X34	X35	X36
														2	3	5	5	3	5	4	5	5	3	2	4	5	2	4	3	3	5	3	5	4	2	3	2	3	5	1	1	4	5	2	4	2	4	5	4
	X1			X2			X3			X4			X5			X6			X7			X8			X9			X10			X11			X12			X13			X14			X15			X16			X17
X1	1	1	1	1	0.5	0.333333	0.333333	0.25	0.2	0.333333	0.25	0.2	1	0.5	0.333333	0.333333	0.25	0.2	0.5	0.333333	0.25	0.333333	0.25	0.2	0.333333	0.25	0.2	1	0.5	0.333333	1	1	1	0.5	0.333333	0.25	0.333333	0.25	0.2	1	1	1	0.5	0.333333	0.25	1	0.5	0.333333	1
X2	1	2	3	1	1	1	0.5	0.333333	0.25	0.5	0.333333	0.25	1	1	1	0.5	0.333333	0.25	1	0.5	0.333333	0.5	0.333333	0.25	0.5	0.333333	0.25	1	1	1	1	2	3	1	0.5	0.333333	0.5	0.333333	0.25	1	2	3	1	0.5	0.333333	1	1	1	1
X3	3	4	5	2	3	4	1	1	1	1	1	1	2	3	4	1	1	1	1	2	3	1	1	1	1	1	1	2	3	4	3	4	5	1	2	3	1	1	1	3	4	5	1	2	3	2	3	4	2
X4	3	4	5	2	3	4	1	1	1	1	1	1	2	3	4	1	1	1	1	2	3	1	1	1	1	1	1	2	3	4	3	4	5	1	2	3	1	1	1	3	4	5	1	2	3	2	3	4	2
X5	1	2	3	1	1	1	0.25	0.333333	0.5	0.25	0.333333	0.5	1	1	1	0.5	0.333333	0.25	1	0.5	0.333333	0.5	0.333333	0.25	0.5	0.333333	0.25	1	1	1	1	2	3	1	0.5	0.333333	0.5	0.333333	0.25	1	2	3	1	0.5	0.333333	1	1	1	1
X6	3	4	5	2	3	4	1	1	1	1	1	1	2	3	4	1	1	1	1	2	3	1	1	1	1	1	1	2	3	4	3	4	5	1	2	3	1	1	1	3	4	5	1	2	3	2	3	4	2
X7	2	3	4	1	2	3	0.333333	0.5	1	0.333333	0.5	1	1	2	3	0.333333	0.5	1	1	1	1	1	0.5	0.333333	1	0.5	0.333333	1	2	3	2	3	4	1	1	1	1	0.5	0.333333	2	3	4	1	1	1	1	2	3	1
X8	3	4	5	2	3	4	1	1	1	1	1	1	2	3	4	1	1	1	1	2	3	1	1	1	1	1	1	2	3	4	3	4	5	1	2	3	1	1	1	3	4	5	1	2	3	2	3	4	2
X9	3	4	5	2	3	4	1	1	1	1	1	1	2	3	4	1	1	1	1	2	3	1	1	1	1	1	1	2	3	4	3	4	5	1	2	3	1	1	1	3	4	5	1	2	3	2	3	4	2
X10	1	2	3	1	1	1	0.25	0.333333	0.5	0.25	0.333333	0.5	1	1	1	0.25	0.333333	0.5	0.333333	0.5	1	0.25	0.333333	0.5	0.25	0.333333	0.5	1	1	1	1	2	3	1	0.5	0.333333	0.5	0.333333	0.25	1	2	3	1	0.5	0.333333	1	1	1	1
X11	1	1	1	0.333333	0.5	1	0.2	0.25	0.333333	0.2	0.25	0.333333	0.333333	0.5	1	0.2	0.25	0.333333	0.25	0.333333	0.5	0.2	0.25	0.333333	0.2	0.25	0.333333	0.333333	0.5	1	1	1	1	0.5	0.333333	0.25	0.333333	0.25	0.2	1	1	1	0.5	0.333333	0.25	1	0.5	0.333333	1
X12	2	3	4	1	2	3	0.333333	0.5	1	0.333333	0.5	1	1	2	3	0.333333	0.5	1	1	1	1	0.333333	0.5	1	0.333333	0.5	1	1	2	3	2	3	4	1	1	1	1	0.5	0.333333	2	3	4	1	1	1	1	2	3	1
X13	3	4	5	2	3	4	1	1	1	1	1	1	2	3	4	1	1	1	1	2	3	1	1	1	1	1	1	2	3	4	3	4	5	1	2	3	1	1	1	3	4	5	1	2	3	2	3	4	2
X14	1	1	1	0.333333	0.5	1	0.2	0.25	0.333333	0.2	0.25	0.333333	0.333333	0.5	1	0.2	0.25	0.333333	0.25	0.333333	0.5	0.2	0.25	0.333333	0.2	0.25	0.333333	0.333333	0.5	1	1	1	1	0.25	0.333333	0.5	0.2	0.25	0.333333	1	1	1	0.5	0.333333	0.25	1	0.5	0.333333	1
X15	2	3	4	1	2	3	0.333333	0.5	1	0.333333	0.5	1	1	2	3	0.333333	0.5	1	1	1	1	0.333333	0.5	1	0.333333	0.5	1	1	2	3	2	3	4	1	1	1	0.333333	0.5	1	2	3	4	1	1	1	1	2	3	1
X16	1	2	3	1	1	1	0.25	0.333333	0.5	0.25	0.333333	0.5	1	1	1	0.25	0.333333	0.5	0.333333	0.5	1	0.25	0.333333	0.5	0.25	0.333333	0.5	1	1	1	1	2	3	0.333333	0.5	1	0.25	0.333333	0.5	1	2	3	0.333333	0.5	1	1	1	1	1
X17	1	2	3	1	1	1	0.25	0.333333	0.5	0.25	0.333333	0.5	1	1	1	0.25	0.333333	0.5	0.333333	0.5	1	0.25	0.333333	0.5	0.25	0.333333	0.5	1	1	1	1	2	3	0.333333	0.5	1	0.25	0.333333	0.5	1	2	3	0.333333	0.5	1	1	1	1	1
X18	3	4	5	2	3	4	1	1	1	1	1	1	2	3	4	1	1	1	1	2	3	1	1	1	1	1	1	2	3	4	3	4	5	1	2	3	1	1	1	3	4	5	1	2	3	2	3	4	2
X19	1	2	3	1	1	1	0.25	0.333333	0.5	0.25	0.333333	0.5	1	1	1	0.25	0.333333	0.5	0.333333	0.5	1	0.25	0.333333	0.5	0.25	0.333333	0.5	1	1	1	1	2	3	0.333333	0.5	1	0.25	0.333333	0.5	1	2	3	0.333333	0.5	1	1	1	1	1
X20	3	4	5	2	3	4	1	1	1	1	1	1	2	3	4	1	1	1	1	2	3	1	1	1	1	1	1	2	3	4	3	4	5	1	2	3	1	1	1	3	4	5	1	2	3	2	3	4	2
X21	2	3	4	1	2	3	0.333333	0.5	1	0.333333	0.5	1	1	2	3	0.333333	0.5	1	1	1	1	0.333333	0.5	1	0.333333	0.5	1	1	2	3	2	3	4	1	1	1	0.333333	0.5	1	2	3	4	1	1	1	1	2	3	1
X22	1	1	1	0.333333	0.5	1	0.2	0.25	0.333333	0.2	0.25	0.333333	0.333333	0.5	1	0.2	0.25	0.333333	0.25	0.333333	0.5	0.2	0.25	0.333333	0.2	0.25	0.333333	0.333333	0.5	1	1	1	1	0.25	0.333333	0.5	0.2	0.25	0.333333	1	1	1	0.25	0.333333	0.5	0.333333	0.5	1	0.333333
X23	1	2	3	1	1	1	0.25	0.333333	0.5	0.25	0.333333	0.5	1	1	1	0.25	0.333333	0.5	0.333333	0.5	1	0.25	0.333333	0.5	0.25	0.333333	0.5	1	1	1	1	2	3	0.333333	0.5	1	0.25	0.333333	0.5	1	2	3	0.333333	0.5	1	1	1	1	1
X24	1	1	1	0.333333	0.5	1	0.2	0.25	0.333333	0.2	0.25	0.333333	0.333333	0.5	1	0.2	0.25	0.333333	0.25	0.333333	0.5	0.2	0.25	0.333333	0.2	0.25	0.333333	0.333333	0.5	1	1	1	1	0.25	0.333333	0.5	0.2	0.25	0.333333	1	1	1	0.25	0.333333	0.5	0.333333	0.5	1	0.333333
X25	1	2	3	1	1	1	0.25	0.333333	0.5	0.25	0.333333	0.5	1	1	1	0.25	0.333333	0.5	0.333333	0.5	1	0.25	0.333333	0.5	0.25	0.333333	0.5	1	1	1	1	2	3	0.333333	0.5	1	0.25	0.333333	0.5	1	2	3	0.333333	0.5	1	1	1	1	1
X26	3	4	5	2	3	4	1	1	1	1	1	1	2	3	4	1	1	1	1	2	3	1	1	1	1	1	1	2	3	4	3	4	5	1	2	3	1	1	1	3	4	5	1	2	3	2	3	4	2
X27	0.333333	0.5	1	0.25	0.333333	0.5	0.166667	0.2	0.25	0.166667	0.2	0.25	0.25	0.333333	0.5	0.166667	0.2	0.25	0.2	0.25	0.333333	0.166667	0.2	0.25	0.166667	0.2	0.25	0.25	0.333333	0.5	0.333333	0.5	1	0.2	0.25	0.333333	0.166667	0.2	0.25	0.333333	0.5	1	0.2	0.25	0.333333	0.25	0.333333	0.5	0.25
X28	0.333333	0.5	1	0.25	0.333333	0.5	0.166667	0.2	0.25	0.166667	0.2	0.25	0.25	0.333333	0.5	0.166667	0.2	0.25	0.2	0.25	0.333333	0.166667	0.2	0.25	0.166667	0.2	0.25	0.25	0.333333	0.5	0.333333	0.5	1	0.2	0.25	0.333333	0.166667	0.2	0.25	0.333333	0.5	1	0.2	0.25	0.333333	0.25	0.333333	0.5	0.25
X29	2	3	4	1	2	3	0.333333	0.5	1	0.333333	0.5	1	1	2	3	0.333333	0.5	1	1	1	1	0.333333	0.5	1	0.333333	0.5	1	1	2	3	2	3	4	1	1	1	0.333333	0.5	1	2	3	4	1	1	1	1	2	3	1
X30	3	4	5	2	3	4	1	1	1	1	1	1	2	3	4	1	1	1	1	2	3	1	1	1	1	1	1	2	3	4	3	4	5	1	2	3	1	1	1	3	4	5	1	2	3	2	3	4	2
X31	1	1	1	0.333333	0.5	1	0.2	0.25	0.333333	0.2	0.25	0.333333	0.333333	0.5	1	0.2	0.25	0.333333	0.25	0.333333	0.5	0.2	0.25	0.333333	0.2	0.25	0.333333	0.333333	0.5	1	1	1	1	0.25	0.333333	0.5	0.2	0.25	0.333333	1	1	1	0.25	0.333333	0.5	0.333333	0.5	1	0.333333
X32	2	3	4	1	2	3	0.333333	0.5	1	0.333333	0.5	1	1	2	3	0.333333	0.5	1	1	1	1	0.333333	0.5	1	0.333333	0.5	1	1	2	3	2	3	4	1	1	1	0.333333	0.5	1	2	3	4	1	1	1	1	2	3	1
X33	1	1	1	0.333333	0.5	1	0.2	0.25	0.333333	0.2	0.25	0.333333	0.333333	0.5	1	0.2	0.25	0.333333	0.25	0.333333	0.5	0.2	0.25	0.333333	0.2	0.25	0.333333	0.333333	0.5	1	1	1	1	0.25	0.333333	0.5	0.2	0.25	0.333333	1	1	1	0.25	0.333333	0.5	0.333333	0.5	1	0.333333
X34	2	3	4	1	2	3	0.333333	0.5	1	0.333333	0.5	1	1	2	3	0.333333	0.5	1	1	1	1	0.333333	0.5	1	0.333333	0.5	1	1	2	3	2	3	4	1	1	1	0.333333	0.5	1	2	3	4	1	1	1	1	2	3	1
X35	3	4	5	2	3	4	1	1	1	1	1	1	2	3	4	1	1	1	1	2	3	1	1	1	1	1	1	2	3	4	3	4	5	1	2	3	1	1	1	3	4	5	1	2	3	2	3	4	2
X36	2	3	4	1	2	3	0.333333	0.5	1	0.333333	0.5	1	1	2	3	0.333333	0.5	1	1	1	1	0.333333	0.5	1	0.333333	0.5	1	1	2	3	2	3	4	1	1	1	0.333333	0.5	1	2	3	4	1	1	1	1	2	3	1
X37	1	1	1	0.333333	0.5	1	0.2	0.25	0.333333	0.2	0.25	0.333333	0.333333	0.5	1	0.2	0.25	0.333333	0.25	0.333333	0.5	0.2	0.25	0.333333	0.2	0.25	0.333333	0.333333	0.5	1	1	1	1	0.25	0.333333	0.5	0.2	0.25	0.333333	1	1	1	0.25	0.333333	0.5	0.333333	0.5	1	0.333333
X38	1	2	3	1	1	1	0.25	0.333333	0.5	0.25	0.333333	0.5	1	1	1	0.25	0.333333	0.5	0.333333	0.5	1	0.25	0.333333	0.5	0.25	0.333333	0.5	1	1	1	1	2	3	0.333333	0.5	1	0.25	0.333333	0.5	1	2	3	0.333333	0.5	1	1	1	1	1
X39	1	1	1	0.333333	0.5	1	0.2	0.25	0.333333	0.2	0.25	0.333333	0.333333	0.5	1	0.2	0.25	0.333333	0.25	0.333333	0.5	0.2	0.25	0.333333	0.2	0.25	0.333333	0.333333	0.5	1	1	1	1	0.25	0.333333	0.5	0.2	0.25	0.333333	1	1	1	0.25	0.333333	0.5	0.333333	0.5	1	0.333333
X40	1	2	3	1	1	1	0.25	0.333333	0.5	0.25	0.333333	0.5	1	1	1	0.25	0.333333	0.5	0.333333	0.5	1	0.25	0.333333	0.5	0.25	0.333333	0.5	1	1	1	1	2	3	0.333333	0.5	1	0.25	0.333333	0.5	1	2	3	0.333333	0.5	1	1	1	1	1
X41	1	1	1	0.333333	0.5	1	0.2	0.25	0.333333	0.2	0.25	0.333333	0.333333	0.5	1	0.2	0.25	0.333333	0.25	0.333333	0.5	0.2	0.25	0.333333	0.2	0.25	0.333333	0.333333	0.5	1	1	1	1	0.25	0.333333	0.5	0.2	0.25	0.333333	1	1	1	0.25	0.333333	0.5	0.333333	0.5	1	0.333333
X42	1	1	1	0.333333	0.5	1	0.2	0.25	0.333333	0.2	0.25	0.333333	0.333333	0.5	1	0.2	0.25	0.333333	0.25	0.333333	0.5	0.2	0.25	0.333333	0.2	0.25	0.333333	0.333333	0.5	1	1	1	1	0.25	0.333333	0.5	0.2	0.25	0.333333	1	1	1	0.25	0.333333	0.5	0.333333	0.5	1	0.333333
X43	1	1	1	0.333333	0.5	1	0.2	0.25	0.333333	0.2	0.25	0.333333	0.333333	0.5	1	0.2	0.25	0.333333	0.25	0.333333	0.5	0.2	0.25	0.333333	0.2	0.25	0.333333	0.333333	0.5	1	1	1	1	0.25	0.333333	0.5	0.2	0.25	0.333333	1	1	1	0.25	0.333333	0.5	0.333333	0.5	1	0.333333
X44	1	2	3	1	1	1	0.25	0.333333	0.5	0.25	0.333333	0.5	1	1	1	0.25	0.333333	0.5	0.333333	0.5	1	0.25	0.333333	0.5	0.25	0.333333	0.5	1	1	1	1	2	3	0.333333	0.5	1	0.25	0.333333	0.5	1	2	3	0.333333	0.5	1	1	1	1	1
X45	2	3	4	1	2	3	0.333333	0.5	1	0.333333	0.5	1	1	2	3	0.333333	0.5	1	1	1	1	0.333333	0.5	1	0.333333	0.5	1	1	2	3	2	3	4	1	1	1	0.333333	0.5	1	2	3	4	1	1	1	1	2	3	1
X46	1	2	3	1	1	1	0.25	0.333333	0.5	0.25	0.333333	0.5	1	1	1	0.25	0.333333	0.5	0.333333	0.5	1	0.25	0.333333	0.5	0.25	0.333333	0.5	1	1	1	1	2	3	0.333333	0.5	1	0.25	0.333333	0.5	1	2	3	0.333333	0.5	1	1	1	1	1
X47	1	2	3	1	1	1	0.25	0.333333	0.5	0.25	0.333333	0.5	1	1	1	0.25	0.333333	0.5	0.333333	0.5	1	0.25	0.333333	0.5	0.25	0.333333	0.5	1	1	1	1	2	3	0.333333	0.5	1	0.25	0.333333	0.5	1	2	3	0.333333	0.5	1	1	1	1	1
X48	1	1	1	0.333333	0.5	1	0.2	0.25	0.333333	0.2	0.25	0.333333	0.333333	0.5	1	0.2	0.25	0.333333	0.25	0.333333	0.5	0.2	0.25	0.333333	0.2	0.25	0.333333	0.333333	0.5	1	1	1	1	0.25	0.333333	0.5	0.2	0.25	0.333333	1	1	1	0.25	0.333333	0.5	0.333333	0.5	1	0.333333
X49	1	1	1	0.333333	0.5	1	0.2	0.25	0.333333	0.2	0.25	0.333333	0.333333	0.5	1	0.2	0.25	0.333333	0.25	0.333333	0.5	0.2	0.25	0.333333	0.2	0.25	0.333333	0.333333	0.5	1	1	1	1	0.25	0.333333	0.5	0.2	0.25	0.333333	1	1	1	0.25	0.333333	0.5	0.333333	0.5	1	0.333333
X50	2	3	4	1	2	3	0.333333	0.5	1	0.333333	0.5	1	1	2	3	0.333333	0.5	1	1	1	1	0.333333	0.5	1	0.333333	0.5	1	1	2	3	2	3	4	1	1	1	0.333333	0.5	1	2	3	4	1	1	1	1	2	3	1
X51	2	3	4	1	2	3	0.333333	0.5	1	0.333333	0.5	1	1	2	3	0.333333	0.5	1	1	1	1	0.333333	0.5	1	0.333333	0.5	1	1	2	3	2	3	4	1	1	1	0.333333	0.5	1	2	3	4	1	1	1	1	2	3	1
X52	1	1	1	0.333333	0.5	1	0.2	0.25	0.333333	0.2	0.25	0.333333	0.333333	0.5	1	0.2	0.25	0.333333	0.25	0.333333	0.5	0.2	0.25	0.333333	0.2	0.25	0.333333	0.333333	0.5	1	1	1	1	0.25	0.333333	0.5	0.2	0.25	0.333333	1	1	1	0.25	0.333333	0.5	0.333333	0.5	1	0.333333
		Geometric Mean					Fuzzy Weights			Average	Normalization
	X1	0.684528	0.510543	0.420584		X1	0.00870647	0.00816546	0.00871071	0.00852755	0.00788985
	X2	0.886949	0.872122	0.85605		X2	0.0112811	0.0139484	0.0177296	0.0143197	0.0132489
	X3	1.72205	2.41832	3.04088		X3	0.0219026	0.0386779	0.0629797	0.0411867	0.0381068
	X4	1.72205	2.41832	3.04088		X4	0.0219026	0.0386779	0.0629797	0.0411867	0.0381068
	X5	0.863616	0.872122	0.879178		X5	0.0109843	0.0139484	0.0182087	0.0143805	0.0133051
	X6	1.72205	2.41832	3.04088		X6	0.0219026	0.0386779	0.0629797	0.0411867	0.0381068
	X7	1.1958	1.48719	1.76373		X7	0.0152094	0.0237856	0.0365286	0.0251745	0.0232919
	X8	1.72205	2.41832	3.04088		X8	0.0219026	0.0386779	0.0629797	0.0411867	0.0381068
	X9	1.72205	2.41832	3.04088		X9	0.0219026	0.0386779	0.0629797	0.0411867	0.0381068
	X10	0.812415	0.872122	0.934587		X10	0.0103331	0.0139484	0.0193562	0.0145459	0.0134582
	X11	0.603593	0.510543	0.476979		X11	0.00767707	0.00816546	0.00987871	0.00857375	0.0079326
	X12	1.14633	1.48719	1.83985		X12	0.0145801	0.0237856	0.0381051	0.0254903	0.0235841
	X13	1.72205	2.41832	3.04088		X13	0.0219026	0.0386779	0.0629797	0.0411867	0.0381068
	X14	0.589778	0.510543	0.488152		X14	0.00750136	0.00816546	0.0101101	0.00859231	0.00794977
	X15	1.12236	1.48719	1.87913		X15	0.0142753	0.0237856	0.0389187	0.0256599	0.023741
	X16	0.76849	0.872122	0.988006		X16	0.00977438	0.0139484	0.0204626	0.0147285	0.0136271
	X17	0.76849	0.872122	0.988006		X17	0.00977438	0.0139484	0.0204626	0.0147285	0.0136271
	X18	1.72205	2.41832	3.04088		X18	0.0219026	0.0386779	0.0629797	0.0411867	0.0381068
	X19	0.758314	0.872122	1.00126		X19	0.00964496	0.0139484	0.0207372	0.0147769	0.0136718
	X20	1.72205	2.41832	3.04088		X20	0.0219026	0.0386779	0.0629797	0.0411867	0.0381068
	X21	1.07593	1.48719	1.96024		X21	0.0136847	0.0237856	0.0405985	0.0260229	0.0240769
	X22	0.528508	0.510543	0.544743		X22	0.00672207	0.00816546	0.0112822	0.00872323	0.00807091
	X23	0.73263	0.872122	1.03637		X23	0.00931828	0.0139484	0.0214642	0.0149103	0.0137953
	X24	0.51746	0.510543	0.556374		X24	0.00658154	0.00816546	0.0115231	0.00875669	0.00810186
	X25	0.73263	0.872122	1.03637		X25	0.00931828	0.0139484	0.0214642	0.0149103	0.0137953
	X26	1.72205	2.41832	3.04088		X26	0.0219026	0.0386779	0.0629797	0.0411867	0.0381068
	X27	0.360348	0.330116	0.346033		X27	0.00458325	0.00527976	0.00716669	0.00567657	0.00525207
	X28	0.360348	0.335984	0.346033		X28	0.00458325	0.00537362	0.00716669	0.00570785	0.00528102
	X29	1.05343	1.50714	2.00209		X29	0.0133986	0.0241047	0.0414653	0.0263229	0.0243545
	X30	1.72205	2.3547	3.04088		X30	0.0219026	0.0376604	0.0629797	0.0408475	0.037793
	X31	0.490207	0.517394	0.587306		X31	0.00623492	0.00827503	0.0121637	0.00889121	0.00822632			تقيمم fuzzy ahp		تقييم الاستبيان
	X32	1.03141	1.46749	2.04484		X32	0.0131185	0.0234706	0.0423507	0.0263133	0.0243455			1		1
	X33	0.483716	0.517394	0.595187		X33	0.00615236	0.00827503	0.0123269	0.0089181	0.0082512			3		2
	X34	1.03141	1.50714	2.04484		X34	0.0131185	0.0241047	0.0423507	0.0265246	0.0245411			5		3
	X35	1.72205	2.3863	3.04088		X35	0.0219026	0.0381657	0.0629797	0.041016	0.0379488			7		4
	X36	1.00985	1.46749	2.0885		X36	0.0128442	0.0234706	0.043255	0.0265233	0.0245398			9		5
	X37	0.466386	0.513375	0.617302		X37	0.00593195	0.00821076	0.0127849	0.00897588	0.00830466
	X38	0.646868	0.867311	1.17377		X38	0.00822749	0.0138715	0.0243099	0.0154696	0.0143128
	X39	0.456636	0.513375	0.630483		X39	0.00580794	0.00821076	0.0130579	0.00902554	0.00835061
	X40	0.646868	0.867311	1.17377		X40	0.00822749	0.0138715	0.0243099	0.0154696	0.0143128
	X41	0.44709	0.510543	0.643945		X41	0.00568652	0.00816546	0.0133367	0.0090629	0.00838518
	X42	0.44709	0.510543	0.643945		X42	0.00568652	0.00816546	0.0133367	0.0090629	0.00838518
	X43	0.44709	0.513375	0.643945		X43	0.00568652	0.00821076	0.0133367	0.009078	0.00839915
	X44	0.646868	0.878949	1.17377		X44	0.00822749	0.0140576	0.0243099	0.0155317	0.0143702
	X45	1.00985	1.47564	2.0885		X45	0.0128442	0.0236008	0.043255	0.0265667	0.02458
	X46	0.633345	0.872122	1.19883		X46	0.00805549	0.0139484	0.0248289	0.015611	0.0144436
	X47	0.633345	0.867311	1.19883		X47	0.00805549	0.0138715	0.0248289	0.0155853	0.0144198
	X48	0.414076	0.510543	0.695287		X48	0.00526661	0.00816546	0.0144001	0.00927738	0.00858361
	X49	0.414076	0.517394	0.695287		X49	0.00526661	0.00827503	0.0144001	0.0093139	0.00861741
	X50	1.00985	1.48719	2.0885		X50	0.0128442	0.0237856	0.043255	0.0266283	0.024637
	X51	1.00985	1.46749	2.0885		X51	0.0128442	0.0234706	0.043255	0.0265233	0.0245398
	X52	0.403183	0.517741	0.714072		X52	0.00512806	0.00828058	0.0147891	0.00939926	0.00869638
	Sum	48.2835	62.5247	78.6229		Total Average				1.08082	1
	Inverse	0.020711	0.0159937	0.0127189
	Arrange	0.0127189	0.0159937	0.020711
[truncated: 107 more columns]

## Sheet: N (8)
	اسم الشركة	نوع الشركة	هل معتمدة ب ISO9000	تخصص الشركة	سنة التأسيس	المنصب	الدرجة العلمية الحاصل عليها	سنوات الخبرة في مجال العمل	عدد المشاريع المنفذة خلال الخمس سنوات الماضية	قيمة المشاريع المنفذة خلال الخمس سنوات الماضية (مليون جنيه مصرى)	قيمة المشروع الحالي	هل تطبق الشركة التي تعمل بها مفاهيم إدارة المشاريع ولديها نظام إدارة الجودة (QMS)	هل لديك أي علاقة بأنشطة إدارة الجودة ؟	1- طريقة تسليم المشروع أي الأجراء المحدد لإنهاء الخدمة التي يختارها العميل مثل ((Design-bid-build(DBB)/Design-build (DB)/Construction Manager at risk(CMAR)/Job order contracting /Fast track)	2- نوع العقد أي طريقة التعاقد بين الجهات المعنيه مثل (Unit price/ Lumpsum/ Cost plus fixed fee / Cost plus percentage fee/ Target cost / Other contract)	3- فئة المقاول أي درجة تصنيف المقاول طبقا لنظام تصنيف المقاولين مثل (درجة أولي - درجة ثانية - أخرى )	4- مدة المشروع أي التأخير عن الجدول الزمني المخطط لتسليم المشروع	5- موقع المشروع أي تأثير الاختيار الامثل لمكان المشروع	1- عدم متابعة العمل من قبل المشاركين في المشروع ( أي عدم قيام أطرف المشروع بمتابعه الاعمال بشكل دوري وعمل تقارير حول ما تم إنجازه )	2- عدم كفايه مواد البناء والمعدات وقطع الغيار ( أي النقص في الموارد المطلوبة وأعمال الصيانة )	3- عدم خبرة مديرين المشاريع، وفريق الإشراف في تحديد الاحتياجات ومتطلبات العمل ( أي عدم القدرة علي تحقيق التوازن بين مختلف المصالح والاحتياجات لأفراد فريق المشروع وأصحاب المصلحة )	4- عدم معرفةمدير مشروع بالتقنيات المناسبة ( أي هل تؤثر عدم معرفةمدير مشروع بالمهارات الفنية والتقنية علي تكلفة الجودة الرديئة ام معرفته بالمهارات الإدارية فقط )	5- المشاكل المتعلقة بالبيئه المحيطه للمشروع ( أي المشاكل المتعلقة بنظام البيئة مثل الهواء والماء والتربة وما إلي ذلك التي نشأت نتيجة للتدخل البشري أو سوء معاملة الأرض )	6- الخلافات والنزاعات بين المشاركين في المشروع ( أي الخلاف بين طرفي العقد بخصوص عقد المشروع او أحدي وثائقه )	7- ضعف تقنيات التخطيط والرقابة ( أي عدم تحقيق الأهداف المرسومة في ظل تحقيق الكفاءة في استخدام الموارد المتاحة )	8- عدم التنسيق بين المصممين والمقاولين ( أي عدم التنسيق بين الأطراف المشاركة لضمان التنفيذ الناجح لجميع المراحل وفقاً للأهداف المخططة )	9- عدم سرعة اتخاذ القرار بمشاركة جميع أطراف المشروع ( أي عدم القدرة علي رؤية الاختيارات المتاحة بوضوح )	10- نقص في تدريب الموارد البشرية على المهارات التي يتطلبها المشروع ( أي قله تدريب و تعزيز مهارات الموظفين لتطوير مهاراتهم وإمكانيتهم )	11- عدم التزام الإدارة بالتحسين المستمر للجودة ( أي قلة العمل علي تطوير العمليات والأنشطة المتعلقة بالالأت و المواد والأفراد وطرق الأنتاج بشكل مستمر )	12- عدم حساب تكلفة الجودة المخططة للمشروع ( أي عدم حساب التكاليف التي تتكبدها الشركة للتأكد من أن منتجاتها أو خدمتها تلبي معايير الجودة المطلوبة )	13- عدم خبرة فريق الإشراف ( أي عدم كفاءة التوجيه والإشراف علي الأعمال )	14- ترددمدير مشروع في اتخاذ القرار المالي ( أي عدم قدرةمدير مشروع في اي تغيير او تعديل علي سبيل المثال تغيير الميزانية المقدرة للمشروع )	15- التردد في اتخاذ القرار في الوقت المناسب من قبلمدير مشروع ( أي المماطلة المزمنة عند إتخاذ القرارات )	16- ضعف الإشراف ومتابعة العمل خلال ساعات العمل الإضافية ( أي ضعف تتبع ساعات نظام العمل الإضافي )	17- عدم مطابقة أهداف الجودة للمعايير والمواصفات ( أي عدم المطابقة لمتطلبات و مواصفات او خصائص معينة قادرة علي الوفاء بالمعايير والمتطلبات المتعارف عليها في المؤسسات المماثلة )	18- ضعف القيادة الفعالة لإدارة المشروع ( أي عدم القدرة علي توجيه وتحفيز الأفراد لتحقيق أهداف محددة )	19- عدم استخدام القوى العاملة الماهرة في التنفيذ ( أي تعيين عمالة بخبرات ضعيفة في أعمال التنفيذ )	20- عدم تخطيط التدفق النقدي ( أي عدم تطبيق نظام لمتابعة حركة الأموال داخل الشركة كل شهر اوخلال فترة معينة )	21- عدم وضوح الهيكل التنظيمي للعاملين بالمشروع ( أي عدم توضيح التنظيم والهيكل الإدراي للمؤسسة وتوزيع المهامات بفاعلية )	22- عدم استخدام أنظمة المشتريات المتكاملة ( أي ضعف ادارة عملية الشراء وعدم تحديد اهم احتياجات المنظمة )	23- ضعف التركيز علي عملية النفقات والمشتريات ( أي عدم متابعة الميزانية والتدفق النقدي )	24- ضعف الإنتاجية ( أي عدم إيجاد نظم وحلول جديدة لاستغلال الموارد المتاحة لتحقيق اعلي جودة في أفضل وقت وبأقل تكاليف ممكنة )	25- ضعف جودة الموارد المستخدمة ( أي عدم مطابقة الموارد للمواصفات و المعايير الفنية )	26- الفجوة بين الجدول الزمني المخطط والفعلي ( أي وجود فرق بين الوقت المخطط والوقت الفعلي المستغرق لإتمام المشروع )	27- الفجوة بين التكلفة المخططة والتكلفة الفعلية ( أي وجود فرق بين التكلفة المخططة والتكلفة الفعلية لإتمام المشروع )	28- الفجوة بين الهدف المخطط والفعلي ( أي وجود اختلاف بين الأداء الفعلي و الأداء المتوقع مستقبليأ للمؤسسة )	1- إهدار الموارد في الموقع ( أي إستخدام الموارد سواء مواد او ومعدات او عمالة بشكل غير جيد )	2- نقص الخبرة والموارد الفنية والمهنية لأداء المهمة ( أي ضعف المهارات لتقييم متطلبات المشروع وتحقيق النتايج المطلوبة )	3- عدم الوعي بالجودة لفريق المشروع ( أي عدم فهم قيمة الجودة والدقة في العمل لتقديم الخدمة بأفضل طريقة )
8	الشركة المصرية لنقل الكهرباء	عامة	نعم	مقاول	2000	مدير المشروع	ماجيستير	من 10 إلي 15سنة	من 5 إلي أقل من 10	أكثر من 500	١٠٠ مليون دولار	نعم	نعم	4	3	5	5	1	3	2	2	2	2	4	4	5	5	3	3	4	2	4	3	4	2	4	2	4	4	2	4	4	2	4	4	4	3	2	2
													8	X1	X2	X3	X4	X5	X6	X7	X8	X9	X10	X11	X12	X13	X14	X15	X16	X17	X18	X19	X20	X21	X22	X23	X24	X25	X26	X27	X28	X29	X30	X31	X32	X33	X34	X35	X36
														4	3	5	5	1	3	2	2	2	2	4	4	5	5	3	3	4	2	4	3	4	2	4	2	4	4	2	4	4	2	4	4	4	3	2	2
	X1			X2			X3			X4			X5			X6			X7			X8			X9			X10			X11			X12			X13			X14			X15			X16			X17
X1	1	1	1	1	2	3	1	0.5	0.333333	1	0.5	0.333333	3	4	5	1	2	3	2	3	4	2	3	4	2	3	4	2	3	4	1	1	1	1	1	1	1	0.5	0.333333	1	0.5	0.333333	1	2	3	1	2	3	1
X2	0.333333	0.5	1	1	1	1	0.5	0.333333	0.25	0.5	0.333333	0.25	2	3	4	1	1	1	1	2	3	1	2	3	1	2	3	1	2	3	1	0.5	0.333333	1	0.5	0.333333	0.5	0.333333	0.25	0.5	0.333333	0.25	1	1	1	1	1	1	1
X3	1	2	3	2	3	4	1	1	1	1	1	1	4	5	6	2	3	4	3	4	5	3	4	5	3	4	5	3	4	5	1	2	3	1	2	3	1	1	1	1	1	1	2	3	4	2	3	4	1
X4	1	2	3	2	3	4	1	1	1	1	1	1	4	5	6	2	3	4	3	4	5	3	4	5	3	4	5	3	4	5	1	2	3	1	2	3	1	1	1	1	1	1	2	3	4	2	3	4	1
X5	0.2	0.25	0.333333	0.25	0.333333	0.5	0.166667	0.2	0.25	0.166667	0.2	0.25	1	1	1	0.5	0.333333	0.25	1	0.5	0.333333	1	0.5	0.333333	1	0.5	0.333333	1	0.5	0.333333	0.333333	0.25	0.2	0.333333	0.25	0.2	0.25	0.2	0.166667	0.25	0.2	0.166667	0.5	0.333333	0.25	0.5	0.333333	0.25	0.333333
X6	0.333333	0.5	1	1	1	1	0.25	0.333333	0.5	0.25	0.333333	0.5	2	3	4	1	1	1	1	2	3	1	2	3	1	2	3	1	2	3	1	0.5	0.333333	1	0.5	0.333333	0.5	0.333333	0.25	0.5	0.333333	0.25	1	1	1	1	1	1	1
X7	0.25	0.333333	0.5	0.333333	0.5	1	0.2	0.25	0.333333	0.2	0.25	0.333333	1	2	3	0.333333	0.5	1	1	1	1	1	1	1	1	1	1	1	1	1	0.5	0.333333	0.25	0.5	0.333333	0.25	0.333333	0.25	0.2	0.333333	0.25	0.2	1	0.5	0.333333	1	0.5	0.333333	0.5
X8	0.25	0.333333	0.5	0.333333	0.5	1	0.2	0.25	0.333333	0.2	0.25	0.333333	1	2	3	0.333333	0.5	1	1	1	1	1	1	1	1	1	1	1	1	1	0.5	0.333333	0.25	0.5	0.333333	0.25	0.333333	0.25	0.2	0.333333	0.25	0.2	1	0.5	0.333333	1	0.5	0.333333	0.5
X9	0.25	0.333333	0.5	0.333333	0.5	1	0.2	0.25	0.333333	0.2	0.25	0.333333	1	2	3	0.333333	0.5	1	1	1	1	1	1	1	1	1	1	1	1	1	0.5	0.333333	0.25	0.5	0.333333	0.25	0.333333	0.25	0.2	0.333333	0.25	0.2	1	0.5	0.333333	1	0.5	0.333333	0.5
X10	0.25	0.333333	0.5	0.333333	0.5	1	0.2	0.25	0.333333	0.2	0.25	0.333333	1	2	3	0.333333	0.5	1	1	1	1	1	1	1	1	1	1	1	1	1	0.5	0.333333	0.25	0.5	0.333333	0.25	0.333333	0.25	0.2	0.333333	0.25	0.2	1	0.5	0.333333	1	0.5	0.333333	0.5
X11	1	1	1	1	2	3	0.333333	0.5	1	0.333333	0.5	1	3	4	5	1	2	3	2	3	4	2	3	4	2	3	4	2	3	4	1	1	1	1	1	1	1	0.5	0.333333	1	0.5	0.333333	1	2	3	1	2	3	1
X12	1	1	1	1	2	3	0.333333	0.5	1	0.333333	0.5	1	3	4	5	1	2	3	2	3	4	2	3	4	2	3	4	2	3	4	1	1	1	1	1	1	1	0.5	0.333333	1	0.5	0.333333	1	2	3	1	2	3	1
X13	1	2	3	2	3	4	1	1	1	1	1	1	4	5	6	2	3	4	3	4	5	3	4	5	3	4	5	3	4	5	1	2	3	1	2	3	1	1	1	1	1	1	2	3	4	2	3	4	1
X14	1	2	3	2	3	4	1	1	1	1	1	1	4	5	6	2	3	4	3	4	5	3	4	5	3	4	5	3	4	5	1	2	3	1	2	3	1	1	1	1	1	1	2	3	4	2	3	4	1
X15	0.333333	0.5	1	1	1	1	0.25	0.333333	0.5	0.25	0.333333	0.5	2	3	4	1	1	1	1	2	3	1	2	3	1	2	3	1	2	3	0.333333	0.5	1	0.333333	0.5	1	0.25	0.333333	0.5	0.25	0.333333	0.5	1	1	1	1	1	1	1
X16	0.333333	0.5	1	1	1	1	0.25	0.333333	0.5	0.25	0.333333	0.5	2	3	4	1	1	1	1	2	3	1	2	3	1	2	3	1	2	3	0.333333	0.5	1	0.333333	0.5	1	0.25	0.333333	0.5	0.25	0.333333	0.5	1	1	1	1	1	1	1
X17	1	1	1	1	2	3	0.333333	0.5	1	0.333333	0.5	1	3	4	5	1	2	3	2	3	4	2	3	4	2	3	4	2	3	4	1	1	1	1	1	1	0.333333	0.5	1	0.333333	0.5	1	1	2	3	1	2	3	1
X18	0.25	0.333333	0.5	0.333333	0.5	1	0.2	0.25	0.333333	0.2	0.25	0.333333	1	2	3	0.333333	0.5	1	1	1	1	1	1	1	1	1	1	1	1	1	0.25	0.333333	0.5	0.25	0.333333	0.5	0.2	0.25	0.333333	0.2	0.25	0.333333	0.333333	0.5	1	0.333333	0.5	1	0.25
X19	1	1	1	1	2	3	0.333333	0.5	1	0.333333	0.5	1	3	4	5	1	2	3	2	3	4	2	3	4	2	3	4	2	3	4	1	1	1	1	1	1	0.333333	0.5	1	0.333333	0.5	1	1	2	3	1	2	3	1
X20	0.333333	0.5	1	1	1	1	0.25	0.333333	0.5	0.25	0.333333	0.5	2	3	4	1	1	1	1	2	3	1	2	3	1	2	3	1	2	3	0.333333	0.5	1	0.333333	0.5	1	0.25	0.333333	0.5	0.25	0.333333	0.5	1	1	1	1	1	1	0.333333
X21	1	1	1	1	2	3	0.333333	0.5	1	0.333333	0.5	1	3	4	5	1	2	3	2	3	4	2	3	4	2	3	4	2	3	4	1	1	1	1	1	1	0.333333	0.5	1	0.333333	0.5	1	1	2	3	1	2	3	1
X22	0.25	0.333333	0.5	0.333333	0.5	1	0.2	0.25	0.333333	0.2	0.25	0.333333	1	2	3	0.333333	0.5	1	1	1	1	1	1	1	1	1	1	1	1	1	0.25	0.333333	0.5	0.25	0.333333	0.5	0.2	0.25	0.333333	0.2	0.25	0.333333	0.333333	0.5	1	0.333333	0.5	1	0.25
X23	1	1	1	1	2	3	0.333333	0.5	1	0.333333	0.5	1	3	4	5	1	2	3	2	3	4	2	3	4	2	3	4	2	3	4	1	1	1	1	1	1	0.333333	0.5	1	0.333333	0.5	1	1	2	3	1	2	3	1
X24	0.25	0.333333	0.5	0.333333	0.5	1	0.2	0.25	0.333333	0.2	0.25	0.333333	1	2	3	0.333333	0.5	1	1	1	1	1	1	1	1	1	1	1	1	1	0.25	0.333333	0.5	0.25	0.333333	0.5	0.2	0.25	0.333333	0.2	0.25	0.333333	0.333333	0.5	1	0.333333	0.5	1	0.25
X25	1	1	1	1	2	3	0.333333	0.5	1	0.333333	0.5	1	3	4	5	1	2	3	2	3	4	2	3	4	2	3	4	2	3	4	1	1	1	1	1	1	0.333333	0.5	1	0.333333	0.5	1	1	2	3	1	2	3	1
X26	1	1	1	1	2	3	0.333333	0.5	1	0.333333	0.5	1	3	4	5	1	2	3	2	3	4	2	3	4	2	3	4	2	3	4	1	1	1	1	1	1	0.333333	0.5	1	0.333333	0.5	1	1	2	3	1	2	3	1
X27	0.25	0.333333	0.5	0.333333	0.5	1	0.2	0.25	0.333333	0.2	0.25	0.333333	1	2	3	0.333333	0.5	1	1	1	1	1	1	1	1	1	1	1	1	1	0.25	0.333333	0.5	0.25	0.333333	0.5	0.2	0.25	0.333333	0.2	0.25	0.333333	0.333333	0.5	1	0.333333	0.5	1	0.25
X28	1	1	1	1	2	3	0.333333	0.5	1	0.333333	0.5	1	3	4	5	1	2	3	2	3	4	2	3	4	2	3	4	2	3	4	1	1	1	1	1	1	0.333333	0.5	1	0.333333	0.5	1	1	2	3	1	2	3	1
X29	1	1	1	1	2	3	0.333333	0.5	1	0.333333	0.5	1	3	4	5	1	2	3	2	3	4	2	3	4	2	3	4	2	3	4	1	1	1	1	1	1	0.333333	0.5	1	0.333333	0.5	1	1	2	3	1	2	3	1
X30	0.25	0.333333	0.5	0.333333	0.5	1	0.2	0.25	0.333333	0.2	0.25	0.333333	1	2	3	0.333333	0.5	1	1	1	1	1	1	1	1	1	1	1	1	1	0.25	0.333333	0.5	0.25	0.333333	0.5	0.2	0.25	0.333333	0.2	0.25	0.333333	0.333333	0.5	1	0.333333	0.5	1	0.25
X31	1	1	1	1	2	3	0.333333	0.5	1	0.333333	0.5	1	3	4	5	1	2	3	2	3	4	2	3	4	2	3	4	2	3	4	1	1	1	1	1	1	0.333333	0.5	1	0.333333	0.5	1	1	2	3	1	2	3	1
X32	1	1	1	1	2	3	0.333333	0.5	1	0.333333	0.5	1	3	4	5	1	2	3	2	3	4	2	3	4	2	3	4	2	3	4	1	1	1	1	1	1	0.333333	0.5	1	0.333333	0.5	1	1	2	3	1	2	3	1
X33	1	1	1	1	2	3	0.333333	0.5	1	0.333333	0.5	1	3	4	5	1	2	3	2	3	4	2	3	4	2	3	4	2	3	4	1	1	1	1	1	1	0.333333	0.5	1	0.333333	0.5	1	1	2	3	1	2	3	1
X34	0.333333	0.5	1	1	1	1	0.25	0.333333	0.5	0.25	0.333333	0.5	2	3	4	1	1	1	1	2	3	1	2	3	1	2	3	1	2	3	0.333333	0.5	1	0.333333	0.5	1	0.25	0.333333	0.5	0.25	0.333333	0.5	1	1	1	1	1	1	0.333333
X35	0.25	0.333333	0.5	0.333333	0.5	1	0.2	0.25	0.333333	0.2	0.25	0.333333	1	2	3	0.333333	0.5	1	1	1	1	1	1	1	1	1	1	1	1	1	0.25	0.333333	0.5	0.25	0.333333	0.5	0.2	0.25	0.333333	0.2	0.25	0.333333	0.333333	0.5	1	0.333333	0.5	1	0.25
X36	0.25	0.333333	0.5	0.333333	0.5	1	0.2	0.25	0.333333	0.2	0.25	0.333333	1	2	3	0.333333	0.5	1	1	1	1	1	1	1	1	1	1	1	1	1	0.25	0.333333	0.5	0.25	0.333333	0.5	0.2	0.25	0.333333	0.2	0.25	0.333333	0.333333	0.5	1	0.333333	0.5	1	0.25
X37	0.25	0.333333	0.5	0.333333	0.5	1	0.2	0.25	0.333333	0.2	0.25	0.333333	1	2	3	0.333333	0.5	1	1	1	1	1	1	1	1	1	1	1	1	1	0.25	0.333333	0.5	0.25	0.333333	0.5	0.2	0.25	0.333333	0.2	0.25	0.333333	0.333333	0.5	1	0.333333	0.5	1	0.25
X38	1	1	1	1	2	3	0.333333	0.5	1	0.333333	0.5	1	3	4	5	1	2	3	2	3	4	2	3	4	2	3	4	2	3	4	1	1	1	1	1	1	0.333333	0.5	1	0.333333	0.5	1	1	2	3	1	2	3	1
X39	1	1	1	1	2	3	0.333333	0.5	1	0.333333	0.5	1	3	4	5	1	2	3	2	3	4	2	3	4	2	3	4	2	3	4	1	1	1	1	1	1	0.333333	0.5	1	0.333333	0.5	1	1	2	3	1	2	3	1
X40	0.25	0.333333	0.5	0.333333	0.5	1	0.2	0.25	0.333333	0.2	0.25	0.333333	1	2	3	0.333333	0.5	1	1	1	1	1	1	1	1	1	1	1	1	1	0.25	0.333333	0.5	0.25	0.333333	0.5	0.2	0.25	0.333333	0.2	0.25	0.333333	0.333333	0.5	1	0.333333	0.5	1	0.25
X41	1	1	1	1	2	3	0.333333	0.5	1	0.333333	0.5	1	3	4	5	1	2	3	2	3	4	2	3	4	2	3	4	2	3	4	1	1	1	1	1	1	0.333333	0.5	1	0.333333	0.5	1	1	2	3	1	2	3	1
X42	1	1	1	1	2	3	0.333333	0.5	1	0.333333	0.5	1	3	4	5	1	2	3	2	3	4	2	3	4	2	3	4	2	3	4	1	1	1	1	1	1	0.333333	0.5	1	0.333333	0.5	1	1	2	3	1	2	3	1
X43	1	1	1	1	2	3	0.333333	0.5	1	0.333333	0.5	1	3	4	5	1	2	3	2	3	4	2	3	4	2	3	4	2	3	4	1	1	1	1	1	1	0.333333	0.5	1	0.333333	0.5	1	1	2	3	1	2	3	1
X44	0.333333	0.5	1	1	1	1	0.25	0.333333	0.5	0.25	0.333333	0.5	2	3	4	1	1	1	1	2	3	1	2	3	1	2	3	1	2	3	0.333333	0.5	1	0.333333	0.5	1	0.25	0.333333	0.5	0.25	0.333333	0.5	1	1	1	1	1	1	0.333333
X45	1	1	1	1	2	3	0.333333	0.5	1	0.333333	0.5	1	3	4	5	1	2	3	2	3	4	2	3	4	2	3	4	2	3	4	1	1	1	1	1	1	0.333333	0.5	1	0.333333	0.5	1	1	2	3	1	2	3	1
X46	0.333333	0.5	1	1	1	1	0.25	0.333333	0.5	0.25	0.333333	0.5	2	3	4	1	1	1	1	2	3	1	2	3	1	2	3	1	2	3	0.333333	0.5	1	0.333333	0.5	1	0.25	0.333333	0.5	0.25	0.333333	0.5	1	1	1	1	1	1	0.333333
X47	0.25	0.333333	0.5	0.333333	0.5	1	0.2	0.25	0.333333	0.2	0.25	0.333333	1	2	3	0.333333	0.5	1	1	1	1	1	1	1	1	1	1	1	1	1	0.25	0.333333	0.5	0.25	0.333333	0.5	0.2	0.25	0.333333	0.2	0.25	0.333333	0.333333	0.5	1	0.333333	0.5	1	0.25
X48	0.25	0.333333	0.5	0.333333	0.5	1	0.2	0.25	0.333333	0.2	0.25	0.333333	1	2	3	0.333333	0.5	1	1	1	1	1	1	1	1	1	1	1	1	1	0.25	0.333333	0.5	0.25	0.333333	0.5	0.2	0.25	0.333333	0.2	0.25	0.333333	0.333333	0.5	1	0.333333	0.5	1	0.25
X49	0.25	0.333333	0.5	0.333333	0.5	1	0.2	0.25	0.333333	0.2	0.25	0.333333	1	2	3	0.333333	0.5	1	1	1	1	1	1	1	1	1	1	1	1	1	0.25	0.333333	0.5	0.25	0.333333	0.5	0.2	0.25	0.333333	0.2	0.25	0.333333	0.333333	0.5	1	0.333333	0.5	1	0.25
X50	0.25	0.333333	0.5	0.333333	0.5	1	0.2	0.25	0.333333	0.2	0.25	0.333333	1	2	3	0.333333	0.5	1	1	1	1	1	1	1	1	1	1	1	1	1	0.25	0.333333	0.5	0.25	0.333333	0.5	0.2	0.25	0.333333	0.2	0.25	0.333333	0.333333	0.5	1	0.333333	0.5	1	0.25
X51	0.25	0.333333	0.5	0.333333	0.5	1	0.2	0.25	0.333333	0.2	0.25	0.333333	1	2	3	0.333333	0.5	1	1	1	1	1	1	1	1	1	1	1	1	1	0.25	0.333333	0.5	0.25	0.333333	0.5	0.2	0.25	0.333333	0.2	0.25	0.333333	0.333333	0.5	1	0.333333	0.5	1	0.25
X52	0.25	0.333333	0.5	0.333333	0.5	1	0.2	0.25	0.333333	0.2	0.25	0.333333	1	2	3	0.333333	0.5	1	1	1	1	1	1	1	1	1	1	1	1	1	0.25	0.333333	0.5	0.25	0.333333	0.5	0.2	0.25	0.333333	0.2	0.25	0.333333	0.333333	0.5	1	0.333333	0.5	1	0.25
		Geometric Mean					Fuzzy Weights			Average	Normalization
	X1	1.31573	1.61833	1.86263		X1	0.0174693	0.0266167	0.0388229	0.0276363	0.0258538
	X2	0.940714	0.926157	0.923136		X2	0.0124901	0.0152326	0.019241	0.0156545	0.0146448
	X3	1.70696	2.64612	3.51957		X3	0.0226638	0.0435208	0.0733586	0.0465144	0.0435142
	X4	1.70696	2.64612	3.51957		X4	0.0226638	0.0435208	0.0733586	0.0465144	0.0435142
	X5	0.509377	0.339842	0.263741		X5	0.00676314	0.00558939	0.00549717	0.0059499	0.00556613
	X6	0.915966	0.926157	0.948078		X6	0.0121615	0.0152326	0.0197608	0.0157183	0.0147045
	X7	0.652898	0.536607	0.482077		X7	0.0086687	0.0088256	0.0100479	0.00918075	0.00858859
	X8	0.652898	0.536607	0.482077		X8	0.0086687	0.0088256	0.0100479	0.00918075	0.00858859
	X9	0.652898	0.536607	0.482077		X9	0.0086687	0.0088256	0.0100479	0.00918075	0.00858859
	X10	0.652898	0.536607	0.482077		X10	0.0086687	0.0088256	0.0100479	0.00918075	0.00858859
	X11	1.26129	1.61833	1.94302		X11	0.0167466	0.0266167	0.0404985	0.0279539	0.0261509
	X12	1.26129	1.61833	1.94302		X12	0.0167466	0.0266167	0.0404985	0.0279539	0.0261509
	X13	1.70696	2.64612	3.51957		X13	0.0226638	0.0435208	0.0733586	0.0465144	0.0435142
	X14	1.70696	2.64612	3.51957		X14	0.0226638	0.0435208	0.0733586	0.0465144	0.0435142
	X15	0.854969	0.926157	1.01572		X15	0.0113517	0.0152326	0.0211706	0.0159183	0.0148916
	X16	0.854969	0.926157	1.01572		X16	0.0113517	0.0152326	0.0211706	0.0159183	0.0148916
	X17	1.20911	1.61833	2.02688		X17	0.0160537	0.0266167	0.0422464	0.0283056	0.0264799
	X18	0.58965	0.536607	0.533785		X18	0.00782895	0.0088256	0.0111257	0.00926009	0.00866281
	X19	1.20911	1.61833	2.02688		X19	0.0160537	0.0266167	0.0422464	0.0283056	0.0264799
	X20	0.819596	0.926157	1.05956		X20	0.010882	0.0152326	0.0220843	0.0160663	0.01503
	X21	1.20911	1.61833	2.02688		X21	0.0160537	0.0266167	0.0422464	0.0283056	0.0264799
	X22	0.562136	0.536607	0.559913		X22	0.00746363	0.0088256	0.0116703	0.00931984	0.00871871
	X23	1.20911	1.61833	2.02688		X23	0.0160537	0.0266167	0.0422464	0.0283056	0.0264799
	X24	0.554692	0.536607	0.567426		X24	0.0073648	0.0088256	0.0118269	0.00933909	0.00873673
	X25	1.20911	1.61833	2.02688		X25	0.0160537	0.0266167	0.0422464	0.0283056	0.0264799
	X26	1.20911	1.61833	2.02688		X26	0.0160537	0.0266167	0.0422464	0.0283056	0.0264799
	X27	0.5401	0.536607	0.582757		X27	0.00717105	0.0088256	0.0121464	0.00938102	0.00877595
	X28	1.20911	1.61833	2.02688		X28	0.0160537	0.0266167	0.0422464	0.0283056	0.0264799
	X29	1.20911	1.5845	2.02688		X29	0.0160537	0.0260603	0.0422464	0.0281201	0.0263064
	X30	0.525891	0.548064	0.598502		X30	0.0069824	0.00901404	0.0124746	0.00949035	0.00887822
	X31	1.20911	1.61833	2.02688		X31	0.0160537	0.0266167	0.0422464	0.0283056	0.0264799			تقيمم fuzzy ahp		تقييم الاستبيان
	X32	1.20911	1.61833	2.02688		X32	0.0160537	0.0266167	0.0422464	0.0283056	0.0264799			1		1
	X33	1.20911	1.5969	2.02688		X33	0.0160537	0.0262643	0.0422464	0.0281881	0.02637			3		2
	X34	0.677674	0.918964	1.28145		X34	0.00899767	0.0151142	0.0267093	0.0169404	0.0158478			5		3
	X35	0.494713	0.536607	0.636221		X35	0.00656844	0.0088256	0.0132608	0.00955161	0.00893553			7		4
	X36	0.494713	0.536607	0.636221		X36	0.00656844	0.0088256	0.0132608	0.00955161	0.00893553			9		5
	X37	0.494713	0.548064	0.636221		X37	0.00656844	0.00901404	0.0132608	0.00961442	0.00899429
	X38	1.20911	1.61833	2.02688		X38	0.0160537	0.0266167	0.0422464	0.0283056	0.0264799
	X39	1.20911	1.5845	2.02688		X39	0.0160537	0.0260603	0.0422464	0.0281201	0.0263064
	X40	0.481698	0.548064	0.65341		X40	0.00639565	0.00901404	0.0136191	0.00967625	0.00905213
	X41	1.20911	1.61833	2.02688		X41	0.0160537	0.0266167	0.0422464	0.0283056	0.0264799
	X42	1.20911	1.61833	2.02688		X42	0.0160537	0.0266167	0.0422464	0.0283056	0.0264799
	X43	1.20911	1.5969	2.02688		X43	0.0160537	0.0262643	0.0422464	0.0281881	0.02637
	X44	0.609739	0.938585	1.42423		X44	0.00809568	0.015437	0.0296852	0.0177393	0.0165951
	X45	1.20911	1.5969	2.02688		X45	0.0160537	0.0262643	0.0422464	0.0281881	0.02637
	X46	0.596992	0.918964	1.45464		X46	0.00792643	0.0151142	0.0303191	0.0177866	0.0166393
	X47	0.437792	0.536607	0.718941		X47	0.00581269	0.0088256	0.0149849	0.0098744	0.0092375
	X48	0.437792	0.536607	0.718941		X48	0.00581269	0.0088256	0.0149849	0.0098744	0.0092375
	X49	0.437792	0.536607	0.718941		X49	0.00581269	0.0088256	0.0149849	0.0098744	0.0092375
	X50	0.437792	0.536607	0.718941		X50	0.00581269	0.0088256	0.0149849	0.0098744	0.0092375
	X51	0.437792	0.536607	0.718941		X51	0.00581269	0.0088256	0.0149849	0.0098744	0.0092375
	X52	0.437792	0.54164	0.718941		X52	0.00581269	0.00890838	0.0149849	0.00990199	0.00926332
	Sum	47.9777	60.8012	75.3166		Total Average				1.06895	1
	Inverse	0.020843	0.016447	0.0132773
	Arrange	0.0132773	0.016447	0.020843
[truncated: 107 more columns]

[truncated: 116 more sheets: N (9), N (10), N (11), N (12), N (13), N (14), N (15), N (16), N (17), N (18), N (19), N (20), N (21), N (22), N (23), N (24), N (25), N (26), N (27), N (28) …]
